# Supplementary material for: How do children and adolescents experience healthcare professionals? Scoping review and interpretive synthesis
Source: PubMed Central journal article supplement — BMJ Open. 2021 Jul 9;11(7):e054368. doi: 10.1136/bmjopen-2021-054368 (PMC8273482; doi:10.1136/bmjopen-2021-054368), 2021-07-09
Supplement: bmjopen-2021-054368.draft_revisions.pdf [file bmjopen-2021-054368.draft_revisions.pdf]

# BMJ Open

BMJ Open is committed to open peer review. As part of this commitment we make the peer review history of every article we publish publicly available.

When an article is published we post the peer reviewers' comments and the authors' responses online. We also post the versions of the paper that were used during peer review. These are the versions that the peer review comments apply to.

The versions of the paper that follow are the versions that were submitted during the peer review process. They are not the versions of record or the final published versions. They should not be cited or distributed as the published version of this manuscript.

BMJ Open is an open access journal and the full, final, typeset and author-corrected version of record of the manuscript is available on our site with no access controls, subscription charges or pay-per-view fees (<http://bmjopen.bmj.com>).

If you have any questions on BMJ Open's open peer review process please email [info.bmjopen@bmj.com](mailto:info.bmjopen@bmj.com)

# BMJ Open

## How do children and adolescents experience healthcare professionals? Scoping review and interpretive synthesis

|                               |                                                                                                                                                                                                                                                                                                                                                                                                                                                                                                             |
|-------------------------------|-------------------------------------------------------------------------------------------------------------------------------------------------------------------------------------------------------------------------------------------------------------------------------------------------------------------------------------------------------------------------------------------------------------------------------------------------------------------------------------------------------------|
| Journal:                      | <i>BMJ Open</i>                                                                                                                                                                                                                                                                                                                                                                                                                                                                                             |
| Manuscript ID                 | bmjopen-2021-054368                                                                                                                                                                                                                                                                                                                                                                                                                                                                                         |
| Article Type:                 | Original research                                                                                                                                                                                                                                                                                                                                                                                                                                                                                           |
| Date Submitted by the Author: | 09-Jun-2021                                                                                                                                                                                                                                                                                                                                                                                                                                                                                                 |
| Complete List of Authors:     | Davison, Gail; Queen's University Belfast, Centre for Medical Education; Royal Belfast Hospital for Sick Children, Children's Emergency Department<br>Kelly, Martina; University of Calgary, Department of Family Medicine<br>Conn, Richard; Queen's University Belfast; Royal Belfast Hospital for Sick Children, General Paediatrics<br>Thompson, Andrew; Royal Belfast Hospital for Sick Children, General Paediatrics Department<br>Dornan, T; Queen's University Belfast, Centre for Medical Education |
| Keywords:                     | PAEDIATRICS, Quality in health care < HEALTH SERVICES ADMINISTRATION & MANAGEMENT, QUALITATIVE RESEARCH                                                                                                                                                                                                                                                                                                                                                                                                     |
|                               |                                                                                                                                                                                                                                                                                                                                                                                                                                                                                                             |

SCHOLARONE™  
Manuscripts

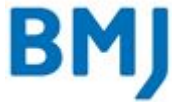

I, the Submitting Author has the right to grant and does grant on behalf of all authors of the Work (as defined in the below author licence), an exclusive licence and/or a non-exclusive licence for contributions from authors who are: i) UK Crown employees; ii) where BMJ has agreed a CC-BY licence shall apply, and/or iii) in accordance with the terms applicable for US Federal Government officers or employees acting as part of their official duties; on a worldwide, perpetual, irrevocable, royalty-free basis to BMJ Publishing Group Ltd ("BMJ") its licensees and where the relevant Journal is co-owned by BMJ to the co-owners of the Journal, to publish the Work in this journal and any other BMJ products and to exploit all rights, as set out in our [licence](#).

The Submitting Author accepts and understands that any supply made under these terms is made by BMJ to the Submitting Author unless you are acting as an employee on behalf of your employer or a postgraduate student of an affiliated institution which is paying any applicable article publishing charge ("APC") for Open Access articles. Where the Submitting Author wishes to make the Work available on an Open Access basis (and intends to pay the relevant APC), the terms of reuse of such Open Access shall be governed by a Creative Commons licence – details of these licences and which [Creative Commons](#) licence will apply to this Work are set out in our licence referred to above.

Other than as permitted in any relevant BMJ Author's Self Archiving Policies, I confirm this Work has not been accepted for publication elsewhere, is not being considered for publication elsewhere and does not duplicate material already published. I confirm all authors consent to publication of this Work and authorise the granting of this licence.

1  
2  
3  
4  
5 1 **TITLE PAGE**  
6

7 2 **How do children and adolescents experience healthcare professionals? Scoping review and**  
8  
9 3 **interpretive synthesis**  
10

11  
12 4 Gail Davison<sup>1,2</sup>, Martina Ann Kelly<sup>3</sup>, Richard Conn<sup>1</sup>, Andrew Thompson<sup>4</sup>, Tim Dornan<sup>5</sup>  
13  
14

15 5 **Institution addresses:**  
16

17  
18 6 <sup>1</sup>Centre for Medical Education, Queen's University Belfast, Mulhouse Building, Mulhouse Road,  
19  
20 7 Belfast, BT12 6DP, Northern Ireland, UK  
21  
22

23  
24 8 <sup>2</sup>Children's Emergency Department, Royal Belfast Hospital for Sick Children, Belfast Health and  
25  
26 9 Social Care Trust, 180 Falls Road, Belfast, BT12 6BE, Northern Ireland, UK  
27  
28

29 10 <sup>3</sup>Department of Family Medicine, Cumming School of Medicine, University of Calgary, 2500  
30  
31 11 University Dr. NW, Calgary AB, T2N 1N4, Canada  
32  
33

34 12 <sup>4</sup>General Paediatrics Department, Royal Belfast Hospital for Sick Children, Belfast Health and  
35  
36 13 Social Care Trust, 180 Falls Road, Belfast, BT12 6BE, Northern Ireland, UK  
37  
38

39 14 <sup>5</sup>Centre for Medical Education, Queen's University Belfast, Whitla Medical Building, 97 Lisburn  
40  
41 15 Road, Belfast, BT9 7BL, Northern Ireland, UK  
42  
43

44 16 **Email addresses:**  
45

46  
47 17 Gail Davison, [gdavison05@qub.ac.uk](mailto:gdavison05@qub.ac.uk), 00447796264757 (phone), no fax available, orcid ID 0000-  
48  
49 18 0003-4875-8331 (corresponding author)  
50  
51

52 19 Martina Ann Kelly, [makelly@ucalgary.ca](mailto:makelly@ucalgary.ca), 00 1 403-210-6318 (phone), 001 403-210-9746 (fax),  
53  
54 20 orcid ID 0000-0002-8763-7092  
55  
56

57 21 Richard Conn, [r.conn@qub.ac.uk](mailto:r.conn@qub.ac.uk), 00447845081449 (phone), no fax available, orcid ID 0000-  
58  
59 22 0002-2564-254X  
60

1

1  
2  
3  
4  
5  
6  
7  
8  
9  
10  
11  
12  
13  
14  
15  
16  
17  
18  
19  
20  
21  
22  
23  
24  
25  
26  
27  
28  
29  
30  
31  
32  
33  
34  
35  
36  
37  
38  
39  
40  
41  
42  
43  
44  
45  
46  
47  
48  
49  
50  
51  
52  
53  
54  
55  
56  
57  
58  
59  
60

23 Andrew Thompson, [andrew.thompson@belfasttrust.hscni.net](mailto:andrew.thompson@belfasttrust.hscni.net), 00447879410712 (phone), no fax  
24 available, orcid ID 0000-0003-4177-4136

25 Tim Dornan, [t.dornan@qub.ac.uk](mailto:t.dornan@qub.ac.uk), 00447712528565 (phone), no fax available, orcid ID 0000-  
26 0001-7830-0183

27 **Word count: 4,143**

28 Dryad unique identifier doi:10.5061/dryad.z08kprrc2

For peer review only

1  
2  
3  
4  
5 30 **ABSTRACT**

6  
7 31 **Objective**

8  
9  
10 32 Explore children's and adolescents' (CADs') lived experiences of healthcare professionals (HCPs).

11  
12  
13 33 **Design**

14  
15  
16 34 Scoping review methodology provided a six-step framework to, first, identify and organise  
17  
18 35 existing evidence. Interpretive phenomenology provided methodological principles for, second,  
19  
20 36 an interpretive synthesis of the life-worlds of CADs receiving healthcare, as represented by  
21  
22 37 verbatim accounts of their experiences.

23  
24  
25 38 **Data Sources**

26  
27  
28 39 Five key databases (Ovid MEDLINE, Embase, Scopus, CINAHL Plus, and Web of Science), from  
29  
30 40 inception through to January 2019, reference lists, and opportunistically identified publications.

31  
32  
33 41 **Eligibility criteria**

34  
35  
36 42 Research articles containing direct first-person quotations by CADs (aged 0-18 years inclusive)  
37  
38 43 describing how they experienced HCPs.

39  
40  
41 44 **Data extraction and synthesis**

42  
43  
44 45 Tabulation of study characteristics, contextual information, and verbatim extraction of all  
45  
46 46 'relevant' (as defined above) direct quotations. Analysis of basic scope of the evidence-base. The  
47  
48 47 research team worked reflexively and collaboratively to interpret the qualitative data and  
49  
50 48 construct a synthesis of children's experiences. To consolidate and elaborate the interpretation,  
51  
52 49 we held two focus groups with CAD inpatients in a children's hospital.

53  
54  
55 50 **Results**

1  
2  
3  
4  
5 51 669 quotations from 99 studies described CADs' experiences of HCPs. Favourable experiences  
6  
7 52 were of forming trusting relationships and being involved in healthcare discussions and  
8  
9 53 decisions; less favourable experiences were of not relating to or being unable to trust HCPs  
10  
11 54 and/or being excluded from conversations about them. HCPs fostered trusting relationships by  
12  
13 55 being personable, wise, sincere, and relatable. HCPs made CADs feel involved by including them  
14  
15 56 in conversations, explaining medical information, and listening to CADs' wider needs and  
16  
17 57 preferences.  
18  
19  
20

## 21 58 **Conclusion**

22  
23  
24 59 These findings strengthen the case for making CADs partners in healthcare despite their youth.  
25  
26 60 We propose that a criterion for high-quality child-centred healthcare should be that HCPs  
27  
28 61 communicate in ways that engender trust and involvement.  
29  
30

## 31 62 **STRENGTHS AND LIMITATIONS OF THIS STUDY**

- 32  
33  
34 63 • Our findings have advanced current evidence by providing a comprehensive overview of  
35  
36 64 CADs' experiences of HCPs, while providing a blueprint for the child-centred care  
37  
38 65 conceptual model.  
39  
40  
41 66 • In addition to completing a scoping review in line with a published protocol, this article  
42  
43 67 reports an interpretive phenomenological synthesis of the evidence-base  
44  
45 68 • Restricting included articles to the English language limited the scope of our review  
46  
47  
48 69 • Limitations in the metadata provided by primary researchers prevented subgroup  
49  
50 70 analyses  
51  
52 71 • The subjectivity of interpretive synthesis is both a limitation and a strength: a limitation,  
53  
54 72 because it does not meet quantitative, experimental standards of proof; and a strength  
55  
56 73 because we used our subject position as clinicians to help fellow clinicians earn the trust  
57  
58 74 of CADs.  
59  
60

## 75 **BACKGROUND**

76 Children's experiences, like patients' experiences in general, are of fundamental importance in  
77 healthcare.[1–3] Research consistently shows that favourable experiences are associated with a  
78 wide range of positive health outcomes, including adherence to recommended treatments,  
79 uptake of preventive care, and utilisation of healthcare resources.[3] Exploring, understanding,  
80 and adapting to patients' experiences, particularly those concerning interpersonal  
81 communication, is the hallmark of patient-centred care (PCC), which is what patients 'strongly  
82 want'. [4,5] Accordingly, PCC has become the dominant ideology in healthcare design and  
83 delivery.[6]

84 In the case of children, however, it has proven more difficult to establish a model of PCC.  
85 Children and adolescents (CADs) are distinct from adults; they are developing physically,  
86 intellectually, and emotionally, and they occupy different positions in society and by law.[7]  
87 CADs, therefore, typically experience healthcare as part of a family unit, accompanied by  
88 parents or guardians who often act on their behalf. These factors affect the roles that CADs  
89 occupy within healthcare settings – how they interact and communicate with others – and  
90 predispose them to asymmetric relationships with adults. To address this, two specific  
91 theoretical models of care – family-centred care (FCC) and child-centred care (CCC) – have been  
92 developed for use in paediatric practice, based on the principles of PCC but incorporating  
93 modified conceptualisations of centredness.[8]

94 In FCC, the family is the central unit of care, with the aspiration of an equal partnership between  
95 healthcare professionals (HCPs) and families. FCC, which first originated in the 1950s, was an  
96 important conceptual advance because, up to this point, no framework existed to involve  
97 parents in their children's care.[7] Recent research shows, however, that even within the FCC  
98 framework, parents and professionals tend to predominate and CADs struggle to be true  
99 participants.[9] In contrast, the newer concept of CCC situates CADs at the centre of healthcare



1  
2  
3  
4  
5 100 practice, giving primacy to their voices and experiences. Rather than being guided by outsider  
6  
7 101 perspectives of children's best interests, CCC compels HCPs to consciously perceive and  
8  
9 102 understand children's conditions, experiences, and priorities, as viewed through their  
10  
11 103 eyes:[8,10,11]

14 104 "[CCC] requires providers to critically consider the child's  
15  
16 105 perspective in every situation while ensuring collaboration  
17  
18 106 with the family who the [child] is part of." [8]

21 107 While aspects of FCC and CCC may be pertinent in different clinical contexts,[12] experts now  
22  
23 108 advocate a move towards CCC,[13] arguing that it better upholds values laid down by the UN  
24  
25 109 Convention on the Rights of the Child and governing bodies (such as the General Medical  
26  
27 110 Council),[14,15] and could improve how CADs experience healthcare.[8,13]

31 111 Adopting the CCC approach, however, requires a major shift in thinking and practice. Research  
32  
33 112 suggests that HCPs' realities are incompatible with CADs', with HCPs focused on prioritizing  
34  
35 113 tasks, 'getting the job done', and mitigating, rather than engaging with, CADs' demands.[16]  
36  
37 114 Furthermore, HCPs' communication strategies adopted for consulting CADs are largely  
38  
39 115 underpinned and conceptualized by biomedical or psychosocial models, from the clinical  
40  
41 116 gaze,[17] with little or no input from CADs.[18,19] And while CADs' healthcare experiences  
42  
43 117 overall are generally positive, large-scale studies have identified shortcomings in how HCPs  
44  
45 118 interact and communicate,[20–22] impacting on CADs' ability to manage their conditions and  
46  
47 119 participate in decision-making.[23] HCPs, too, continue to find communicating with CADs  
48  
49 120 challenging, supporting a change in thinking and practice.[19]

54 121 To achieve the vision of CCC, then, HCPs need greater insight into the experiences of sick  
55  
56 122 children.[11] This reflects a wider drive towards co-production (providers and service users  
57  
58 123 working in equal partnership to effect change) in children's healthcare;[24,25] and also

1  
2  
3  
4  
5 124 complements the present impetus to acknowledge and examine CADs' *own* experiences,  
6  
7 125 opinions, and priorities, within research,[26,27] quality improvement,[28–30] and standard  
8  
9 126 setting.[31] To date, however, most research and surveys examining experiences in paediatric  
10  
11 127 settings have relied on parents' accounts, while CADs have participated less, if at all.[32]  
12  
13 128 Nevertheless, the few studies that have explored CADs' own experiential accounts have found  
14  
15 129 them to be informative and distinct from parents'.[23,33] At present, these accounts are widely  
16  
17 130 dispersed, yet if compiled, synthesised, and interpreted, these could provide a rich account of  
18  
19 131 CADs' lived experiences of how they encounter HCPs.  
20  
21  
22

23 132 This study aimed to explore how CADs experience HCPs within interpersonal interactions, in  
24  
25 133 order to provide practitioners, organisations, and policymakers with evidence that could  
26  
27 134 promote child-centred communication. First, we conducted a scoping literature review to  
28  
29 135 systematically gather evidence on CADs' experiences of HCPs. Second, we interpreted CADs'  
30  
31 136 extracted quotations from the perspective of phenomenology. This well-established  
32  
33 137 methodological tradition, grounded in philosophy, enables researchers to produce valid  
34  
35 138 interpretations by examining and interpreting participants' verbatim accounts of their lived  
36  
37 139 experience.[34] Finally, we organised the interpretation into a synthetic account of how CADs  
38  
39 140 experience their interactions with HCPs.  
40  
41  
42  
43

## 44 141 **METHODS**

### 45 142 **Methodological orientation**

46 143 Scoping review methodology has a pragmatic orientation in the sense that it sets out to map  
47  
48 144 existing published evidence on a topic but it is adaptable in the sense that the usefulness of its  
49  
50 145 procedures is not tied to any one specific epistemology (theory of the nature of knowledge).[35–  
51  
52 146 37] As in our previously published research,[38] this review augments scoping review  
53  
54 147 procedures with interpretive phenomenology. The latter has an ontology (theory of the nature  
55  
56 148 of being) derived from the philosophy of Husserl, according to which the lived experience of  
57  
58  
59  
60

1  
2  
3  
4  
5 149 research participants is a legitimate topic of qualitative inquiry.[34] Interpretive phenomenology  
6  
7 150 helps researchers respond reflexively to spoken or written words and arrive at valid, subjective  
8  
9 151 interpretations. Phenomenologists typically take a reflexive stance that consciously sets aside  
10  
11 152 strong a priori preconceptions whilst allowing their own experiences (such as, in our case, having  
12  
13 153 experience of caring for sick children) to help them construct an informative interpretation. The  
14  
15 154 quality of a constructivist interpretation is to be judged by its trustworthiness, authenticity, and  
16  
17 155 ability to catalyse action – which, in this case, would be to improve future children’s healthcare  
18  
19 156 experiences.[39]

### 23 157 **Study procedures**

25 158 The research followed a published protocol (accessible at <https://rdcu.be/b2FFk>),[40] which  
26  
27 159 proposed to supplement traditional scoping review procedures with an interpretive synthesis,  
28  
29 160 the distinction between which is explained in the previous paragraph. The scoping component  
30  
31 161 followed the 6-step framework outlined by Arksey & O’Malley,[35] Levac et al.,[36] and  
32  
33 162 Colquhoun et al.,[37] adhering to PRISMA-ScR reporting guidance (included in online  
34  
35 163 supplementary file 1).[41]

### 39 164 **Step 1: Defining the research question**

42 165 This was: *‘What is known about children’s and adolescents’ experiences of healthcare*  
43  
44 166 *professionals, from their present perspective?’*, the final phrase emphasizing our commitment to  
45  
46 167 CADs’ contemporaneous accounts of their experiences expressed in their own words, rather  
47  
48 168 than parents’ descriptions or adults describing childhood memories.

### 51 169 **Step 2: Identifying relevant articles**

54 170 We designed a STARLITE search strategy (summarised in table 1) to identify all published articles  
55  
56 171 containing CADs’ experiences of HCPs expressed as first-person direct quotations.[42] A subject  
57  
58 172 librarian constructed a database search (included in online supplementary file 2), using the

173 population, context, and concept framework,[43] combining the terms ‘children’ or  
 174 ‘adolescents’, ‘healthcare’, and ‘experience’ (and synonyms), limiting it to English language  
 175 articles, ‘qualitative research’, and ‘0 to 18 years’, and then running it on Ovid MEDLINE,  
 176 Embase, Scopus, CINAHL Plus, and Web of Science from inception to 11<sup>th</sup> January 2019. We  
 177 included other articles found by searching relevant reference lists or found opportunistically.

**Table 1 STARLITE summary of search strategy[42]**

|                                  |                                                                                                                                                                 |
|----------------------------------|-----------------------------------------------------------------------------------------------------------------------------------------------------------------|
| Sampling strategy                | Comprehensive: attempting to identify all published materials                                                                                                   |
| Types of studies                 | Any published study contributing to the research question: qualitative (with or without other methodologies (i.e., mixed method)); primary or secondary sources |
| Approaches                       | Electronic database searching; manual searching of reference lists; articles found opportunistically                                                            |
| Range of years                   | From database inception until 11 <sup>th</sup> January 2019                                                                                                     |
| Limits                           | Articles published in English language; ‘qualitative research’; children aged 0-18 years (inclusive)                                                            |
| Inclusion and exclusion criteria | See table 2 and Step 3: Study selection                                                                                                                         |
| Terms used                       | See online supplementary file 2                                                                                                                                 |
| Electronic databases             | Ovid MEDLINE; Embase; Scopus; CINAHL Plus; Web of Science                                                                                                       |

178 **Step 3: Study selection**

179 Refinement of selection criteria

180 As is customary in scoping review, the process iterated between searching, selecting, extracting  
 181 data, and refining the research question. To enhance the rigour of this process, and in keeping  
 182 with our interpretive stance, we responded reflexively to the accumulating evidence, discussing  
 183 our interpretations, and articulating a clear rationale for each refinement. All records were  
 184 imported to Mendeley Reference Manager, duplicates removed, titles and abstracts screened  
 185 against five screening questions (Box 1), and full texts of those that screened positive reviewed  
 186 against eligibility criteria.

**Box 1 Screening questions**

1. Are the participants CADs ( $\leq$  18 years)?
2. Is the study examining an aspect of health, illness, or healthcare?
3. Are CADs participating as recipients of healthcare?
4. Are participants aged > 18 years excluded from the study?
5. Do children or adolescents describe experiences?

1  
2  
3  
4  
5 187 These criteria, at first provisional (table 2A), were progressively refined in response to the  
6  
7 188 heterogeneity of evidence. Table 2B shows final criteria. GD led the process of first-screening,  
8  
9 189 annotating, sorting, and collating articles. MK & TD supported her by second-screening 10% of  
10  
11 190 records, discussing results, assessing articles whose eligibility was in doubt, and responding to  
12  
13 191 the often-imprecise details given by researchers. Any ambiguities (i.e., lack of age ranges) during  
14  
15 192 screening led to full-text review and a final decision about eligibility against criteria. To optimise  
16  
17 193 validity of the selection process, GD rescreened all records and annotations after each  
18  
19 194 refinement and, finally, after definitive criteria had been set.

#### 22 195 Rationale for criteria

23  
24 196 We included children up to and including 18 years because late adolescents are increasingly  
25  
26 197 cared for in paediatric settings.[44,45] Our age range conforms, also, with the United Nations'  
27  
28 198 influential definition of adolescence.[46] We included articles that contained verbatim  
29  
30 199 quotations irrespective of methodology. Judgement of methodological quality was not a  
31  
32 200 criterion for three reasons: it is not standard practice in scoping reviews; it is notoriously difficult  
33  
34 201 to judge qualitative research categorically;[46] and the interpretive synthesis used verbatim  
35  
36 202 quotations, whose validity does not depend on what the primary researchers did with CADs'  
37  
38 203 words. Because authors often failed to report the exact age of patient participants they quoted,  
39  
40 204 we excluded any study that included patient participants aged > 18 years (see, for example,  
41  
42 205 Tjaden et al. [47]).  
43  
44  
45  
46  
47  
48  
49  
50  
51  
52  
53  
54  
55  
56  
57  
58  
59  
60

| <b>Table 2 Eligibility criteria for article selection</b>                                                                                                                                                                                                                        |                                                                                                                                                                                                                                                                                                                                                                                                                                                                                                                                                                                                                   |
|----------------------------------------------------------------------------------------------------------------------------------------------------------------------------------------------------------------------------------------------------------------------------------|-------------------------------------------------------------------------------------------------------------------------------------------------------------------------------------------------------------------------------------------------------------------------------------------------------------------------------------------------------------------------------------------------------------------------------------------------------------------------------------------------------------------------------------------------------------------------------------------------------------------|
| <b>A. Provisional</b>                                                                                                                                                                                                                                                            | <b>B. Definitive</b>                                                                                                                                                                                                                                                                                                                                                                                                                                                                                                                                                                                              |
| Inclusion criteria:                                                                                                                                                                                                                                                              |                                                                                                                                                                                                                                                                                                                                                                                                                                                                                                                                                                                                                   |
| <ol style="list-style-type: none"> <li>CADs speaking about HCPs, through first-person direct quotations.</li> <li>HCP defined as a member of a healthcare team.</li> <li>CADs defined as <math>\leq 18</math> years old, regardless of health status or illness type.</li> </ol> | <ol style="list-style-type: none"> <li>CADs speaking about one or more HCPs, on one or more instances, from any experience, through first-person direct quotation(s), where there had been direct contact between the two parties, and where CADs were the persons receiving healthcare.</li> <li>An HCP defined as a member of a healthcare team with professional qualifications and training, such as a qualified doctor, nurse, therapist, psychologist, or social workers, regardless of grade.</li> <li>CADs defined as <math>\leq 18</math> years, regardless of health status or illness type.</li> </ol> |
| Exclusion criteria:                                                                                                                                                                                                                                                              |                                                                                                                                                                                                                                                                                                                                                                                                                                                                                                                                                                                                                   |
| <ol style="list-style-type: none"> <li>Adults aged <math>&gt;18</math> years included in the study.</li> <li>Non-English language publications.</li> </ol>                                                                                                                       | <ol style="list-style-type: none"> <li>Adult <u>patients</u> aged <math>&gt;18</math> years included in the study with or without CADs as defined above.</li> <li>Non-English language publications.</li> <li>CADs speaking about HCP(s) not from memory of personal experience as a patient; for example, third-party description (e.g., parent).</li> <li>Age range of CAD participants unclear.</li> <li>No full-text manuscript available; only an abstract available, or unobtainable by searching online, directly emailing authors, or by university librarians requesting inter-library loans.</li> </ol> |

1  
2  
3  
4  
5 207 **Step 4: Charting the data**

6  
7 208 GD and MK piloted a spreadsheet to chart study characteristics, contextual information, and all  
8  
9 209 CADs' verbatim quotations on 10 articles; this resulted in the final dataset shown in box 2, which  
10  
11  
12 210 GD then used to extract data on the remaining articles.

13  
14  
15 **Box 2 Data extracted**

16  
17 Study characteristics:

- 18 - First author
- 19 - Year published
- 20 - Country of origin
- 21 - No. CAD participants
- 22 - Age range of CAD participants
- 23 - Male to female (or non-binary) ratio
- 24 - Other participants (e.g., parents)
- 25 - Methods
- 26 - Methodology (or analytical approach)

27  
28  
29 Contextual information:

- 30 - Study focus (the experience being explored)
- 31 - Health setting
- 32 - Health condition
- 33 - Length of healthcare encounter being explored

34  
35  
36 CADs' quotations:

- 37 - All first-person direct quotations, where CADs are talking about HCPs
- 38 - Age and gender referenced to each quotation

39  
40 211 When key information was missing or unclear, we sought clarification from primary authors. All  
41  
42 212 authors independently reviewed the extracted information for its fitness to address the aims  
43  
44 213 and purpose of the study, subsequently conferring to optimise the validity of the dataset.

45  
46  
47 214 **Step 5: Collating, summarising, and reporting the results**

48  
49  
50 215 We first analysed the basic characteristics of included studies. We then identified themes in the  
51  
52 216 verbatim quotations following Braun and Clarke's method of thematic analysis as defined by  
53  
54 217 their checklist (included in online supplementary file 3).[48,49] GD immersed herself in the data,  
55  
56 218 reviewing all quotations on Microsoft Excel, using NVivo 12 qualitative analysis software to  
57  
58 219 support generation of codes and construction of themes.[50] Other team members supported

1  
2  
3  
4  
5 220 her interpretation, by reviewing quotations first individually, and then collectively. We  
6  
7 221 systematically interrogated the data for themes that had meaning in relation to the research  
8  
9 222 question, revising candidate themes periodically (with the aid of a visual thematic map) to  
10  
11 223 ensure these were coherent, distinctive, complementary, and relevant. The ensuing thematic  
12  
13 224 structure had central concepts, which we used to organise subordinate themes and their  
14  
15 225 associated codes. Throughout this process, we constantly compared our evolving interpretation  
16  
17 226 against the original data, including a final 'quality control' check of the synthesis against all  
18  
19 227 quotations.[49]

20  
21  
22  
23 228 In keeping with our interpretive stance, we used our different subject positions as  
24  
25 229 paediatricians, a family doctor, and an adult internist to interpret CADs' words reflexively and  
26  
27 230 arrive at 'beyond-surface insights', so that the themes were amenable to an additional stage of  
28  
29 231 phenomenological synthesis.[48,49] As we did this, the gamut of emotional content in CADs'  
30  
31 232 words became an increasingly compelling influence on our interpretation. CADs' emotional  
32  
33 233 expressions tended to have quite distinct 'valence' (defined as the attractiveness [positive  
34  
35 234 valence] or averseness [negative valence] of the emotions described) which linked in recurring  
36  
37 235 ways to HCPs' reported behaviours.[51,52] So, for example, a HCP who related well to a child  
38  
39 236 might engender trust, while an HCP who related poorly might engender mistrust.

40  
41  
42  
43  
44 237 Whilst crude dichotomies between positive/negative emotions and behaviours do not reflect  
45  
46 238 the subtlety of interpretive research, links between these contrasting behaviours were so clearly  
47  
48 239 present that they offered a parsimonious way of presenting our results. The Results section uses  
49  
50 240 the terms 'favourable' and 'unfavourable' to specify what are, in reality, nuanced polarities. To  
51  
52 241 epitomize these important themes in ways that could encourage HCPs to emulate favourable  
53  
54 242 behaviours, we present predominantly favourable behaviours, but provide negative counter-  
55  
56 243 examples to emphasize the breadth of CADs' experiences. As in previous research,[53] we used  
57  
58 244 CADs' own words, as far as possible, to construct a narrative of findings that was as true as  
59  
60 13



1  
2  
3  
4  
5 245 possible to the phenomena experienced and narrated by children. We use the wording 'HCPs did  
6  
7 246 X' as a shorthand for the more correct wording, 'CADs experienced HCPs as doing X'.  
8  
9

#### 10 247 **Step 6: Stakeholder consultations**

11  
12 248 As recommended by Levac et al.,[36] GD, AT, and RC (with research ethics and governance  
13  
14 249 approvals) recruited CADs aged 8-16 from inpatient wards in the Royal Belfast Hospital for Sick  
15  
16 250 Children (RBHSC) to two focus groups whose aim was to consolidate and elaborate on findings.  
17  
18 251 Participants and parents chose whether parents should attend. We presented candidate themes  
19  
20 252 along with exemplar quotations and facilitated discussions, asking participants to comment on  
21  
22 253 provisional findings and provide suggestions for practice. We audio-recorded sessions and  
23  
24 254 transcribed recordings verbatim. We reviewed transcripts alongside the provisional findings to  
25  
26 255 authenticate, build upon, and summarise a final narrative of results. Participants' identities are  
27  
28 256 pseudonymised in the results section.  
29  
30  
31  
32

#### 33 257 **Patient and public involvement**

34  
35  
36 258 The essence of this research was to involve children, albeit as expressed verbatim by other  
37  
38 259 researchers. The stakeholder consultation further fulfilled the patient and public involvement  
39  
40 260 component of the research by ensuring findings disseminated were intelligible and relevant.  
41  
42  
43

## 44 261 **RESULTS**

45  
46 262 We identified 1,359 articles, excluding 1,015 by screening and 245 by reviewing full texts, and  
47  
48 263 categorised reasons for exclusion on a PRISMA flow diagram (shown in figure 1).  
49  
50

#### 51 264 **Overview of included studies**

52  
53  
54 265 Table 3 presents an overview of included studies (n=99), published between 1992 and 2018. In  
55  
56 266 total, 4,448 CADs, aged 11 months to 18 years, participated. Most studies included 8 to 50  
57  
58 267 participants (n=73), aged 7 or older (n=70), and used interviews only (n=64). Studies commonly  
59  
60

1  
2  
3  
4  
5 268 included CADs with chronic and potentially debilitating or life-threatening conditions (such as  
6  
7 269 asthma and cancers), explored long-term experiences (over months to years), and focused on  
8  
9 270 hospital care. Further descriptive findings and figures are presented in online supplementary file  
10  
11 271 4.  
12  
13  
14  
15  
16  
17  
18  
19  
20  
21  
22  
23  
24  
25  
26  
27  
28  
29  
30  
31  
32  
33  
34  
35  
36  
37  
38  
39  
40  
41  
42  
43  
44  
45  
46  
47  
48  
49  
50  
51  
52  
53  
54  
55  
56  
57  
58  
59  
60

For peer review only

Table 3 Study characteristics

| Study details                                |          | CAD participants |           |         | Design             |                                          | Contextual information          |                |                           |                     | Data       |
|----------------------------------------------|----------|------------------|-----------|---------|--------------------|------------------------------------------|---------------------------------|----------------|---------------------------|---------------------|------------|
| First author, year                           | Country  | n                | Age (yrs) | M:F     | Methods            | Methodology/analytical approach          | Study focus (experience of)     | Health setting | Health condition          | Length of encounter | Quotes (n) |
| Aalsma <i>et al.</i> , 2014[54]              | US       | 19               | 11-17     | 12:7    | INT                | Qualitative                              | CAMHS                           | Non-specific   | Mental health illness     | Long-term           | 5          |
| Alex MR, 1992[55]                            | Canada   | 24               | 7-11      | 13:11   | INT, Q             | Content analysis                         | Pain                            | Hospital       | Surgical (post-op)        | Short-term          | 4          |
| Anderson <i>et al.</i> , 2017[56]            | England  | 6                | 15-18     | 3:3     | INT                | Interpretative phenomenological analysis | Lung transplantation            | Hospital       | Post-lung transplantation | Long-term           | 6          |
| Ångström-Brännström <i>et al.</i> , 2008[57] | Sweden   | 7                | 4-10      | 3:4     | INT (PT)           | Thematic analysis                        | Being comforted                 | Hospital       | Chronic                   | Short-term          | 6          |
| Ångström-Brännström <i>et al.</i> , 2014[58] | Sweden   | 9                | 3-9       | 5:4     | INT                | Content analysis                         | Comfort during cancer treatment | Hospital       | Cancer                    | Long-term           | 3          |
| Beresford <i>et al.</i> , 2003[59]           | England  | 63               | 11-16     | 27:36   | INT, FG (PT)       | Framework method                         | Communicating                   | Hospital       | Chronic                   | Long-term           | 14         |
| Boyd <i>et al.</i> , 1998[60]                | Canada   | 6                | 10-13     | 2:4     | INT (PT), WT       | Grounded theory                          | Hospital and coping strategies  | Hospital       | Surgical (chronic)        | Long-term           | 3          |
| Brown <i>et al.</i> , 2014[61]               | US       | 19               | 11-17     | 12:7    | INT                | Grounded theory                          | Therapeutic alliances           | Hospital       | Mental health illness     | ~                   | 16         |
| Carney <i>et al.</i> , 2003[62]              | Scotland | 213              | 4-17      | 115:98  | INT, FTQ           | Thematic analysis                        | Healthcare                      | Hospital       | Non-specific              | Non-specific        | 9          |
| Cheng <i>et al.</i> , 2003[63]               | Taiwan   | 90               | 5-14      | 45:45   | INT                | Content analysis                         | Pain                            | Hospital       | Non-specific              | Non-specific        | 1          |
| Cheng <i>et al.</i> , 2016[64]               | Taiwan   | 11               | 12-18     | 7:4     | INT                | Content analysis                         | Cancer recovery                 | Hospital       | Cancer                    | Long-term           | 1          |
| Christofides <i>et al.</i> , 2016[65]        | Canada   | 19               | 8-18      | 7:12    | INT                | Thematic analysis                        | Research participation          | Hospital       | Cystic fibrosis           | Long-term           | 3          |
| Clift <i>et al.</i> , 2007[66]               | Wales    | 6                | 11-15     | 3:3     | INT                | Qualitative                              | Emergency admission             | Hospital       | Non-specific              | Short-term          | 7          |
| Colver <i>et al.</i> , 2018[67]              | England  | 374              | 14-18     | 219:155 | INT, Q, OBS        | Constant comparison                      | Transition                      | Hospital       | Medical                   | Long-term           | 2          |
| Corsano <i>et al.</i> , 2015[68]             | Italy    | 27               | 6-15      | 12:15   | INT                | Qualitative                              | Emotional events                | Hospital       | Cancer/ blood disorders   | Long-term           | 4          |
| Coyne, 2006[69]                              | Ireland  | 55               | 7-18      | 30:25   | INT, FG            | Constant comparison analysis             | Participating/ decision-making  | Hospital       | Non-specific              | Non-specific        | 52         |
| Coyne, 2006a[70]                             | Ireland  | 11               | 7-14      | ~       | INT                | Grounded theory                          | Hospitalisation                 | Hospital       | Non-specific              | ~                   | 1          |
| Coyne, 2006b[71]                             | Ireland  | 11               | 9-14      | ~       | INT (PT), FTQ, OBS | Grounded theory                          | Participating                   | Hospital       | Non-specific              | ~                   | 4          |
| Coyne <i>et al.</i> , 2007[72]               | Ireland  | 17               | 7-16      | ~       | INT                | Qualitative                              | Hospitalisation                 | Hospital       | Non-specific              | Non-specific        | 8          |

| Study details                        |           | CAD participants |           |       | Design        |                                                | Contextual information               |                |                       |                     | Data       |
|--------------------------------------|-----------|------------------|-----------|-------|---------------|------------------------------------------------|--------------------------------------|----------------|-----------------------|---------------------|------------|
| First author, year                   | Country   | n                | Age (yrs) | M:F   | Methods       | Methodology/analytical approach                | Study focus (experience of)          | Health setting | Health condition      | Length of encounter | Quotes (n) |
| Coyne, 2011[73]                      | Ireland   | 55               | 7-18      | 31:24 | INT, FG       | Qualitative                                    | Communicating/ decision-making       | Hospital       | Non-specific          | Non-specific        | 20         |
| Coyne, 2012[74]                      | Ireland   | 38               | 7-18      | ~     | INT (PT)      | Content analysis                               | Hospital and HCPs                    | Hospital       | ~                     | ~                   | 24         |
| Coyne, 2014[75]                      | Ireland   | 20               | 7-16      | 11:9  | INT (PT)      | Constant comparison analysis                   | Participating/ decision-making       | Hospital       | Cancer                | Long-term           | 2          |
| Coyne <i>et al.</i> , 2015[76]       | Ireland   | 15               | 12-18     | 6:9   | INT, FG       | Thematic analysis                              | CAMHS                                | Non-specific   | Mental health illness | Long-term           | 6          |
| Coyne <i>et al.</i> , 2016[77]       | Ireland   | 20               | 7-16      | 11:9  | INT           | Grounded theory                                | Communicating                        | Hospital       | Cancer                | Long-term           | 6          |
| Curtis <i>et al.</i> , 2017[78]      | England   | 17               | 5-16      | ~     | INT (PT), OBS | Ethnographic                                   | Single/ shared rooms                 | Hospital       | ~                     | ~                   | 3          |
| Das <i>et al.</i> , 2017[79]         | India     | 14               | 8-15      | ~     | FG            | Qualitative                                    | Living with HIV                      | Non-specific   | HIV                   | Long-term           | 1          |
| Day <i>et al.</i> , 2006[80]         | England   | 11               | 9-14      | 5:6   | FG            | Thematic Analysis                              | CAMHS                                | Non-specific   | Mental health illness | Long-term           | 13         |
| Dell'Api <i>et al.</i> , 2007[81]    | Canada    | 5                | 10-17     | 2:3   | INT           | Qualitative                                    | Interacting with HCPs                | Hospital       | Non-specific          | Long-term           | 19         |
| Dixon-Woods <i>et al.</i> , 2002[82] | England   | 20               | 8-16      | 9:11  | INT           | Constant comparison analysis                   | Asthma services                      | Community      | Asthma                | Long-term           | 12         |
| Edgecombe <i>et al.</i> , 2010[83]   | England   | 22               | 11-18     | 16:6  | INT           | Thematic analysis                              | Asthma services                      | Hospital       | Asthma                | Long-term           | 5          |
| Ekra <i>et al.</i> , 2012[84]        | Norway    | 9                | 7-12      | 5:4   | INT, OBS (PT) | Hermeneutic phenomenology                      | Hospitalisation                      | Hospital       | TIDM                  | Long-term           | 2          |
| Engvall <i>et al.</i> , 2016[85]     | Sweden    | 13               | 5-15      | 6:7   | INT (PT)      | Content Analysis                               | Radiotherapy                         | Hospital       | Cancer                | Long-term           | 2          |
| Forsner <i>et al.</i> , 2005[86]     | Sweden    | 7                | 7-10      | 4:3   | INT           | Thematic analysis                              | Illness                              | Hospital       | ~                     | Short-term          | 4          |
| Forsner <i>et al.</i> , 2009[87]     | Sweden    | 9                | 7-11      | 2:7   | INT, OBS      | Hermeneutic phenomenology                      | Fear                                 | Hospital       | Non-specific          | Short-term          | 4          |
| Garth <i>et al.</i> , 2009[88]       | Australia | 10               | 8-12      | 3:7   | INT           | Grounded theory                                | Participating                        | Non-specific   | Cerebral palsy        | Long-term           | 3          |
| Gill <i>et al.</i> , 2016[89]        | England   | 12               | 14-17     | 2:10  | INT           | Thematic analysis                              | CAMHS inpatient ward                 | Non-specific   | Mental health illness | Long-term           | 2          |
| Griffiths <i>et al.</i> , 2011[90]   | Australia | 9                | 8-16      | ~     | INT           | Interpretative phenomenological analysis       | Living with cancer                   | Non-specific   | Cancer                | Long-term           | 3          |
| Haase <i>et al.</i> , 1994[91]       | US        | 7                | 5-18      | 3:4   | INT (PT)      | Colaizzi's method of phenomenological analysis | Completing cancer treatment          | Non-specific   | Cancer                | Long-term           | 6          |
| Hall <i>et al.</i> , 2013[92]        | England   | 17               | 8-17      | ~     | INT           | Thematic analysis                              | Life with repaired cleft lip/ palate | Non-specific   | Cleft lip/ palate     | Long-term           | 1          |

1  
2  
3  
4  
5  
6  
7  
8  
9  
10  
11  
12  
13  
14  
15  
16  
17  
18  
19  
20  
21  
22  
23  
24  
25  
26  
27  
28  
29  
30  
31  
32  
33  
34  
35  
36  
37  
38  
39  
40  
41  
42  
43  
44  
45  
46

| Study details                          |           | CAD participants |           |       | Design           |                                                    | Contextual information          |                |                        |                     | Data       |
|----------------------------------------|-----------|------------------|-----------|-------|------------------|----------------------------------------------------|---------------------------------|----------------|------------------------|---------------------|------------|
| First author, year                     | Country   | n                | Age (yrs) | M:F   | Methods          | Methodology/analytical approach                    | Study focus (experience of)     | Health setting | Health condition       | Length of encounter | Quotes (n) |
| Han <i>et al.</i> , 2011[93]           | China     | 29               | 7-14      | 16:13 | INT              | Content analysis                                   | Cancer                          | Hospital       | Cancer                 | Long-term           | 2          |
| Hanson <i>et al.</i> , 2017[94]        | US        | 30               | 4-14      | 16:14 | INT              | Narrative analysis                                 | Pain                            | Hospital       | Fractured arm          | Short-term          | 5          |
| Harper <i>et al.</i> , 2013[95]        | England   | 10               | 16-18     | 3:7   | INT              | Interpretative phenomenological analysis           | CAMHS                           | Non-specific   | Mental health illness  | Long-term           | 8          |
| Hart <i>et al.</i> , 2018[96]          | England   | 14               | 14-16     | ~     | INT              | Thematic analysis                                  | CAMHS                           | Non-specific   | Mental health illness  | Long-term           | 2          |
| Hawthorne <i>et al.</i> , 2011[97]     | England   | 21               | 7-16      | 12:9  | FG               | Thematic analysis                                  | Diabetes services               | Hospital       | T1DM                   | Long-term           | 8          |
| Hinton <i>et al.</i> , 2015[98]        | England   | 21               | 8-17      | 6:15  | INT (PT)         | Constant comparison analysis                       | A multiple sclerosis diagnosis  | Non-specific   | Multiple sclerosis     | Long-term           | 3          |
| Hodgins <i>et al.</i> , 1997[99]       | Canada    | 85               | 5-13      | 38:41 | INT, Q           | Mixed-method                                       | Venepuncture                    | Hospital       | Non-specific           | Short-term          | 3          |
| Hutton, 2005[100]                      | Australia | 7                | 13-18     | 3:4   | INT (PT)         | Qualitative                                        | Adolescent wards                | Hospital       | Cystic fibrosis/asthma | Long-term           | 3          |
| Jachyra <i>et al.</i> , 2018a[101]†    | Canada    | 8                | 11-17     | 4:4   | INT              | Interpretative phenomenological analysis           | Talking about weight            | Non-specific   | ASD                    | Long-term           | 6          |
| Jachyra <i>et al.</i> , 2018b[102]†    | Canada    | 8                | 11-17     | 4:4   | INT              | Interpretative phenomenological analysis           | Talking about weight            | Non-specific   | ASD                    | Long-term           | 4          |
| Jensen <i>et al.</i> , 2012[103]       | Denmark   | 8                | 8-10      | 5:3   | INT (PT)         | Thematic analysis                                  | Acute hospitalisation           | Hospital       | Medical                | Short-term          | 6          |
| Jongudomkarn <i>et al.</i> , 2006[104] | Thailand  | 49               | 4-18      | 31:18 | INT, FG, OBS, PT | Content analysis                                   | Pain                            | Non-specific   | Non-specific           | Long-term           | 1          |
| Kluthe <i>et al.</i> , 2018[105]       | Canada    | 18               | 6-17      | 11:7  | INT              | Content analysis                                   | IBD diagnosis                   | Hospital       | IBD                    | Long-term           | 1          |
| Koller <i>et al.</i> , 2010[106]       | Canada    | 21               | 5-18      | 12:9  | INT (PT)         | Grounded theory                                    | Hospitalisation during SARS     | Hospital       | Non-specific           | Long-term           | 2          |
| Koller, 2017[107]                      | Canada    | 26               | 5-18      | 11:15 | INT (PT)         | Thematic analysis                                  | Medical education/participating | Hospital       | Chronic                | Long-term           | 10         |
| Kortesluoma <i>et al.</i> , 2006[108]† | Finland   | 44               | 4-11      | ~     | INT              | Content analysis                                   | Pain                            | Hospital       | Non-specific           | Non-specific        | 1          |
| Kortesluoma <i>et al.</i> , 2008[109]† | Finland   | 44               | 4-11      | 27:17 | INT              | Content analysis                                   | Pain                            | Hospital       | Non-specific           | Non-specific        | 7          |
| Lewis <i>et al.</i> , 2007[110]        | Australia | 9                | 8-16      | 5:4   | INT              | Cognitive mapping                                  | Receiving care                  | Hospital       | ~                      | ~                   | 5          |
| Livesley <i>et al.</i> , 2013[16]      | England   | 15               | 5-15      | 3:2   | INT (PT), OBS    | Critical ethnography, constant comparison analysis | Hospitalisation                 | Hospital       | Surgical               | Long-term           | 4          |
| Lowes <i>et al.</i> , 2015[23]         | Wales     | 518              | 7-15      | ~     | FTQ              | Qualitative descriptive analysis                   | Life with T1DM and services     | Hospital       | T1DM                   | Long-term           | 8          |

| Study details                                         |           | CAD participants |           |           | Design              |                                                | Contextual information            |                |                          |                     | Data       |
|-------------------------------------------------------|-----------|------------------|-----------|-----------|---------------------|------------------------------------------------|-----------------------------------|----------------|--------------------------|---------------------|------------|
| First author, year                                    | Country   | n                | Age (yrs) | M:F       | Methods             | Methodology/analytical approach                | Study focus (experience of)       | Health setting | Health condition         | Length of encounter | Quotes (n) |
| Macartney <i>et al.</i> , 2014[111]                   | Canada    | 12               | 9-18      | 6:6       | INT                 | Content analysis                               | Life after a brain tumour         | Non-specific   | Brain tumour             | Long-term           | 1          |
| Manookian <i>et al.</i> , 2014[112]                   | Iran      | 6                | 6-17      | 3:3       | INT                 | Interpretative phenomenological analysis       | Stem cell transplantation         | Hospital       | Cancer & blood disorders | Long-term           | 4          |
| Marcinowicz <i>et al.</i> , 2016[113]                 | Poland    | 22               | 10-16     | 8:14      | INT                 | Content analysis                               | Nurse relationships and wards     | Hospital       | ~                        | ~                   | 7          |
| Marshman <i>et al.</i> , 2010[114]                    | England   | 10               | 12-14     | 5:5       | INT, Q              | Framework analysis                             | Malocclusion treatment            | Non-specific   | Malocclusion             | Long-term           | 1          |
| McNelis <i>et al.</i> , 2007[115]                     | India     | 11               | 7-15      | 6:5       | FG                  | Thematic analysis                              | Living with epilepsy              | Non-specific   | Epilepsy                 | Long-term           | 2          |
| McPherson <i>et al.</i> , 2017[116]                   | Canada    | 17               | 6-18      | 8:9       | INT                 | Phenomenology, thematic analysis               | Talking about weight              | Hospital       | Spina Bifida             | Long-term           | 3          |
| McPherson <i>et al.</i> , 2018[117]                   | Canada    | 18               | 10-17     | 9:9       | INT, FG             | Thematic analysis                              | Talking about weight              | Hospital       | Non-specific             | Long-term           | 3          |
| Moules, 2009[118]                                     | England   | 138              | 9-14      | 82:56     | INT (PT)            | Framework analysis                             | Hospital care                     | Hospital       | ~                        | ~                   | 3          |
| Nguyen <i>et al.</i> , 2010[119]                      | Sweden    | 40               | 7-12      | ~         | INT, Q, vital signs | Content analysis                               | Music therapy for lumbar puncture | Hospital       | Cancer                   | Short-term          | 1          |
| Nilsson <i>et al.</i> , 2011[120]                     | Sweden    | 39               | 5-10      | 32:7      | INT                 | Content analysis                               | Pain                              | Hospital       | Skin trauma              | Short-term          | 4          |
| Noreña Peña AL <i>et al.</i> , 2011[121] <sup>†</sup> | Spain     | 30               | 8-14      | 13:17     | INT, OBS            | Critical incident technique                    | Communicating with nurses         | Hospital       | Surgical                 | ~                   | 24         |
| Noreña Peña AL <i>et al.</i> , 2014[122] <sup>†</sup> | Spain     | 30               | 8-14      | 13:17     | INT, OBS            | Critical incident technique                    | Communicating with nurses         | Hospital       | Surgical                 | ~                   | 22         |
| Olausson <i>et al.</i> , 2006[123]                    | Sweden    | 18               | 4-18      | 8:10      | INT                 | Hermeneutic phenomenology                      | Life after transplantation        | Non-specific   | Post- transplant         | Long-term           | 6          |
| Pelander <i>et al.</i> , 2004[124]                    | Finland   | 40               | 4-11      | 28:12     | INT                 | Content analysis                               | Nursing care                      | Hospital       | Chronic (T1DM & other)   | Long-term           | 3          |
| Pelander <i>et al.</i> , 2010[125]                    | Finland   | 388              | 7-11      | 198:188 * | FTQ                 | Content analysis                               | Hospitalisation                   | Hospital       | Non-specific             | Non-specific        | 2          |
| Pölkki <i>et al.</i> , 1999[126]                      | Finland   | 20               | 7-11      | ~         | INT, WT             | Content analysis                               | Pain                              | Hospital       | Non-specific             | ~                   | 1          |
| Pope <i>et al.</i> , 2018[127]                        | Australia | 15               | 4-8       | 11:4      | INT (PT)            | Thematic analysis                              | Pain and nurses' roles            | Hospital       | Trauma                   | Short-term          | 1          |
| Randall, 2012[128]                                    | England   | 21               | 0.9-17    | 8:12 *    | INT, FG (PT), PTD   | Colaizzi's method of phenomenological analysis | Community children's nursing      | Community      | Non-specific             | Long-term           | 4          |
| Rankin <i>et al.</i> , 2018[129]                      | Scotland  | 24               | 9-12      | 13:11     | INT (PT)            | Thematic analysis                              | Managing T1DM                     | Non-specific   | T1DM                     | Long-term           | 1          |
| Roper <i>et al.</i> , 2018[27]                        | England   | 16               | 7-15      | 9:7       | INT                 | Qualitative                                    | Research participation/ consent   | Hospital       | Asthma or anaphylaxis    | Short-term          | 7          |

1  
2  
3  
4  
5  
6  
7  
8  
9  
10  
11  
12  
13  
14  
15  
16  
17  
18  
19  
20  
21  
22  
23  
24  
25  
26  
27  
28  
29  
30  
31  
32  
33  
34  
35  
36  
37  
38  
39  
40  
41  
42  
43  
44  
45  
46

| Study details                        |                 | CAD participants |           |        | Design       |                                                | Contextual information           |                    |                       |                     | Data       |
|--------------------------------------|-----------------|------------------|-----------|--------|--------------|------------------------------------------------|----------------------------------|--------------------|-----------------------|---------------------|------------|
| First author, year                   | Country         | n                | Age (yrs) | M:F    | Methods      | Methodology/analytical approach                | Study focus (experience of)      | Health setting     | Health condition      | Length of encounter | Quotes (n) |
| Ruhe <i>et al.</i> , 2016[130]       | Switzerland     | 17               | 9-17      | 11:6   | INT          | Thematic analysis                              | Participating                    | Hospital           | Cancer                | Long-term           | 1          |
| Ryals, 2011[131]                     | US              | 8                | 13-17     | 6:2    | INT          | Phenomenology                                  | Therapeutic relationships        | Non-specific       | Mental health illness | Long-term           | 59         |
| Saarikoski <i>et al.</i> , 2018[132] | Finland         | 19               | 6-12      | 7:12   | FG           | Content analysis                               | Therapeutic intervention         | Community (school) | Enuresis              | Long-term           | 1          |
| Salmela <i>et al.</i> , 2010[133]    | Finland         | 90               | 4-6       | ~      | INT          | Colaizzi's method of phenomenological analysis | Hospital related fears           | Hospital           | ~                     | ~                   | 4          |
| Schalkers <i>et al.</i> , 2014[134]  | The Netherlands | 63               | 6-18      | 31:32  | INT (PT), WT | Action research                                | Hospital care                    | Hospital           | Non-specific          | ~                   | 8          |
| Schmidt <i>et al.</i> , 2007[135]    | US              | 65               | 5-18      | 34:31  | INT, FTQ     | Thematic analysis                              | Nurses in hospital               | Hospital           | Non-specific          | Non-specific        | 45         |
| Spalding <i>et al.</i> , 2016[136]   | England         | 7                | 8-14      | 2:5    | WS (PT)      | Action research, thematic analysis             | Good doctors                     | Hospice            | Palliative            | Long-term           | 3          |
| Stevens <i>et al.</i> , 2006[137]    | Canada          | 14               | 7-16      | 9:5    | INT          | Content analysis                               | Home chemotherapy                | Community (home)   | Cancer                | Long-term           | 1          |
| Taylor <i>et al.</i> , 2010[138]     | England         | 14               | 12-18     | ~      | INT          | Framework analysis                             | Life after transplantation       | Non-specific       | Liver transplant      | Long-term           | 6          |
| Vejzovic <i>et al.</i> , 2014[139]   | Sweden          | 17               | 10-17     | 5:12   | INT          | Content analysis                               | Preparing for colonoscopy        | Hospital           | Suspected IBD         | Short-term          | 4          |
| Vindrola-Padros, 2012[140]           | Argentina       | 10               | 8-16      | 5:5    | INT (PT)     | Narrative analysis                             | Living with cancer               | Non-specific       | Cancer                | Long-term           | 4          |
| Wangmo <i>et al.</i> , 2016[141]     | Switzerland     | 17               | 9-17      | 11:6   | INT          | Qualitative                                    | Cancer services and treatment    | Hospital           | Cancer                | Long-term           | 5          |
| Watson <i>et al.</i> , 2009[142]     | US              | 9                | 14-18     | 7:1:1# | INT          | Grounded theory                                | Assessing CAMHS & mental illness | Non-specific       | Mental health illness | Long-term           | 1          |
| Wen <i>et al.</i> , 2013[143]§       | Singapore       | 203              | 4-18      | ~      | INT, OBS     | Thematic analysis                              | Pain                             | Non-specific       | Surgical (post-op)    | Non-specific        | 15         |
| Wise, 2002[144]                      | US              | 9                | 7-15      | ~      | INT (PT)     | Hermeneutic phenomenology                      | Transplantation                  | Non-specific       | Liver transplant      | Long-term           | 7          |
| Wong <i>et al.</i> , 2012[145]       | China           | 79               | 10-13     | 54:25  | FG           | Qualitative                                    | Weight-loss program              | Community (school) | Obesity               | Long-term           | 1          |
| Woodgate, 2008[146]                  | Canada          | 13               | 9-17      | 7:6    | INT          | Constant comparison analysis                   | Cancer symptoms                  | Non-specific       | Cancer                | Long-term           | 1          |
| Wray <i>et al.</i> , 2018[147]       | England         | 543              | 8-16      | ~      | INT, FG, Q   | Framework Analysis                             | Healthcare                       | Hospital           | ~                     | ~                   | 5          |
| Xie <i>et al.</i> , 2016[148]        | China           | 21               | 7-12      | 12:9   | INT          | Content Analysis                               | Lumbar puncture                  | Hospital           | ALL                   | Short-term          | 15         |
| Young <i>et al.</i> , 2003[149]      | England         | 13               | 8-17      | 8:5    | INT          | Constant comparison analysis                   | Communicating                    | Hospital           | Cancer                | Long-term           | 7          |

1  
2  
3  
4  
5  
6  
7  
8  
9  
10  
11  
12  
13  
14  
15  
16  
17  
18  
19  
20  
21  
22  
23  
24  
25  
26  
27  
28  
29  
30  
31  
32  
33  
34  
35  
36  
37  
38  
39  
40  
41  
42  
43  
44  
45  
46

Note:

Non-specific, not focusing on a certain type or area; ALL, acute lymphoblastic leukaemia; ASD, autism spectrum disorder; CAMHS, child and adolescent mental health service; HIV, human immunodeficiency virus; IDB, inflammatory bowel disease; SARS, severe acute respiratory syndrome; T1DM, type 1 diabetes mellitus. FG, focus groups; FTQ, free-text questionnaires; INT, interviews; OBS, observations; PT, participatory techniques employed; PTD, photo talk diaries; Q, quantitative questionnaires; WS, workshops; WT, writings; ~, unable to ascertain; \*, numerical inconsistency detected in source article; †, same study with different quotations presented; §, qualitative systematic review; #, non-binary gender.



1  
2  
3  
4  
5 **279 Children's and adolescents' experiences**  
6

7  
8 280 Six-hundred and sixty-nine quotations referred to CADs' experiences of HCPs, most of whom  
9  
10 281 were doctors or nurses. CADs also spoke about their experiences with counsellors,  
11  
12 282 psychologists, social workers, and dentists. CADs' ages (available for 397 quotations), ranged  
13  
14 283 from 5-18 years (average 13); male and female participants were equally represented (see  
15  
16 284 supplementary file 5). All quotations extracted are available at doi:10.5061/dryad.z08kprrc2;  
17  
18 285 quotations presented below are cited in online supplementary file 6.  
19  
20

21  
22 286 CADs' favourable experiences were of HCPs forming trusting relationships and involving them in  
23  
24 287 healthcare discussions and decisions and their unfavourable experiences were generally towards  
25  
26 288 the opposite pole.  
27

28  
29 289 Forming trusting relationships  
30

31  
32 290 *Their nature*  
33

34  
35 291 Being in a trusting relationship was feeling a 'bond', having an 'emotional attachment', or having  
36  
37 292 a 'best friend'. CADs and HCPs knew each other, could 'relate to' each other, and really  
38  
39 293 understood each other. There was openness, transparency, and there was trust. CADs trusted in  
40  
41 294 HCPs to provide 'good care', knowing they would do everything necessary, and do it right.  
42  
43  
44

45 295 *Their origins*  
46

47  
48 296 At first, HCPs were 'strangers'; CADs did not know the HCPs, who they were, and how they were.  
49  
50 297 HCPs, likewise, did not know CADs, their histories, or their personalities. Repeated contact and  
51  
52 298 dialogue built and reinforced relationships: 'As time passed, [...] we created that bond.'  
53  
54  
55 299 HCPs engendered trusting relationships by demonstrating positive attributes, including being  
56  
57 300 able to empathise. CADs trusted in HCPs who were 'very smart', 'experienced', '[knew] what to  
58  
59  
60

1  
2  
3  
4  
5 301 do', '[took] care', and did 'everything the best they [could]'. They trusted HCPs who were  
6  
7 302 'truthful', '100% with you', and 'just [told] you straight up.' Such HCPs did 'not tell children any  
8  
9 303 lies'; 'nothing [was] hidden'. CADs built trusting relationships with HCPs who were 'really nice',  
10  
11 304 'nurturing, caring, and helpful people who [were] there for you', and had a 'good sense of  
12  
13  
14 305 [humour]'.  
15  
16

17 306 HCPs related to CADs by understanding them: 'she knew what I was talking about, she knew  
18  
19 307 what I was feeling, she knew how I was feeling.' HCPs 'took time to get to know' CADs and had  
20  
21 308 'real conversations, not just [HCP]-patient discussions', in which they shared experiences and  
22  
23 309 got to know each other personally. CADs could better relate to HCPs who were 'down to earth'  
24  
25  
26 310 and had 'a lot in common'.  
27  
28

### 29 311 *Their effects*

30  
31  
32 312 Trust was vital: 'you gotta have trust.' Trusting relationships improved CADs' healthcare  
33  
34 313 experiences by promoting positive emotions. CADs felt 'satisfied' and 'happy'. They enjoyed  
35  
36 314 their time with HCPs and had 'good memories'. CADs were more able to 'open up' or 'tell  
37  
38 315 anything' to HCPs whom they trusted. Trusting relationships gave CADs hope that HCPs could  
39  
40 316 'cure [the] illness' or help lessen the pain. CADs who trusted HCPs submitted themselves more  
41  
42 317 willingly to recommended treatments: 'whatever happens I let them [HCPs] do what they have  
43  
44 318 to do to help me get better.' And they consciously chose to remain with or seek out HCPs they  
45  
46 319 trusted. CADs admired trustworthy HCPs: 'individually [they're] all heroes.' And they aspired to  
47  
48  
49 320 be like them: 'Because you can save people [...] I'm going to be a children's doctor.'

### 50 51 52 321 Being involved in healthcare discussions and decisions

### 53 54 55 322 *The nature of involvement*

1  
2  
3  
4  
5 323 CADs who were fully involved in healthcare discussions felt they knew everything; 'everything  
6  
7 324 [was] always clear' to them. They had a seat at the table to discuss issues that affected them and  
8  
9  
10 325 felt acknowledged as key stakeholders. CADs worked 'together' with HCPs and parents; they felt  
11  
12 326 as though they were respected, taken 'seriously', and treated 'as an equal'.

13  
14  
15 327 *Its origins*

16  
17 328 HCPs involved CADs by including them in conversations, sharing information, providing  
18  
19 329 opportunities to ask questions, taking time to answer, and listening to their wider needs and  
20  
21 330 preferences. HCPs who promoted involvement used simple words, communicated in a timely  
22  
23 331 way, gave accurate information at the right pace, and explained things so that CADs understood.  
24  
25 332 These HCPs brought CADs 'into all the conversations' by talking to CADs 'as much as they [talked  
26  
27 333 to the] parents'. Parents facilitated CADs' involvement in the presence of HCPs or afterwards by  
28  
29 334 '[breaking] the words down in an easier explanation'. HCPs promoted participation by 'listening'  
30  
31 335 to and respecting CADs' requests: 'I tell them I don't want this and they ... understand'. For more  
32  
33 336 complex decisions, CADs took a joint approach: 'me because I know my own body, my parents  
34  
35 337 because they know what's best for me [...] and the paediatrician because they are qualified.'

36  
37  
38  
39  
40  
41 338 *Its effects*

42  
43 339 CADs viewed involvement as 'most important, as in the end it is about [them]'. CADs enjoyed  
44  
45 340 being involved; it was 'brilliant', and they looked forward to their next visit. CADs were more  
46  
47 341 satisfied with healthcare; they found it 'interesting and informational'. Getting to 'learn  
48  
49 342 something new' made them feel 'comfortable and confident'. CADs could 'make better  
50  
51 343 decisions' because they were 'fully informed'. This promoted self-advocacy and self-efficacy:  
52  
53 344 'I'm asking the doctor more questions myself than having my Dad do it.'

54  
55  
56  
57 345 Not forming trusting relationships or being involved

1  
2  
3  
4  
5 346 CADs described unfavourable experiences, which broadly *mirrored* favourable ones. For  
6  
7 347 instance, trust was undermined by HCPs getting things wrong, being 'nasty', and not '[seeming]  
8  
9 348 that concerned'. HCPs being unfamiliar to CADs because they were 'too busy' or because HCPs  
10  
11 349 or CADs moved to other services prevented trusting relationships forming. HCPs excluded CADs  
12  
13 350 by using 'big words', speaking too fast, or telling them nothing, so that CADs could not  
14  
15 351 understand. HCPs neglecting to ask CADs or asking in a tokenistic way prevented them 'having a  
16  
17 352 say': 'they [HCPs] might ask me "is that ok" [...] in such a way that I kind of feel like I don't have  
18  
19 353 any other option but [to] agree with them'. HCPs and parents side-lined CADs by talking behind  
20  
21 354 the curtains so CADs could not hear or sticking them 'in the middle' of a conversation where  
22  
23 355 they could not interrupt. Some parents told CADs to keep quiet or dominated conversations:  
24  
25 356 'you try to say something but then your parents just say shhhhh! [...] They come out and say, [...]  
26  
27 357 did you understand that, you say no, they say, you should have asked them, and then you say,  
28  
29 358 oh you didn't let me, they say rubbish!'  
30  
31  
32  
33  
34  
35 359 Not trusting people or understanding what was happening made CADs fearful. HCPs who made  
36  
37 360 CADs feel 'rejected' and objectified, 'like a piece of machinery', enraged them. CADs found it  
38  
39 361 'hard to talk', disengaged in conversations, and left the talking to their parents. Not trusting in  
40  
41 362 HCPs or being uninvolved meant some CADs hated hospital or clinic, they objected to attending,  
42  
43 363 and sought information or guidance from other sources.  
44  
45  
46

#### 364 Stakeholder consultations

47  
48  
49 365 Two CAD inpatients participated in each of two focus groups (3 females and 1 male, aged 11-15  
50  
51 366 years) lasting 67 and 93 minutes respectively. Their medical conditions included type 1 diabetes,  
52  
53 367 coeliac disease, spina bifida, and spinal/brain surgery. No parents attended. Three authors (GD,  
54  
55 368 AT, & RC) attended both consultations and a hospital play specialist attended the first  
56  
57 369 consultation. Participants identified with the provisional findings and elaborated on them (table  
58  
59  
60

1  
2  
3  
4  
5  
6  
7  
8  
9  
10  
11  
12  
13  
14  
15  
16  
17  
18  
19  
20  
21  
22  
23  
24  
25  
26  
27  
28  
29  
30  
31  
32  
33  
34  
35  
36  
37  
38  
39  
40  
41  
42  
43  
44  
45  
46  
47  
48  
49  
50  
51  
52  
53  
54  
55  
56  
57  
58  
59  
60

370 4). All wanted some degree of involvement in their own care though the amount of information  
371 and level of participation they wanted depended on their age, what was being discussed, and  
372 individual preferences. Box 3 offers take-home messages for HCPs.

For peer review only

373 **Table 4 Stakeholder findings: Focus group participants' experiences mapped to overarching themes**

| Overarching themes       | Forming trusting relationships                                                                                                                                                                                                                                                                                                                                                                                                                                                                                                                                                                                                                                                                                                                                                                                                                                                                                                                                                                                                                                                                                                                                                                  | Being involved in healthcare discussions and decisions                                                                                                                                                                                                                                                                                                                                                                                                                                                                                                                                                                                                                                                                                                                                                                                                                                                                                                                                                                                                                                                                                                                                                                                                                                                                                                                                                                                                                                                                                           |
|--------------------------|-------------------------------------------------------------------------------------------------------------------------------------------------------------------------------------------------------------------------------------------------------------------------------------------------------------------------------------------------------------------------------------------------------------------------------------------------------------------------------------------------------------------------------------------------------------------------------------------------------------------------------------------------------------------------------------------------------------------------------------------------------------------------------------------------------------------------------------------------------------------------------------------------------------------------------------------------------------------------------------------------------------------------------------------------------------------------------------------------------------------------------------------------------------------------------------------------|--------------------------------------------------------------------------------------------------------------------------------------------------------------------------------------------------------------------------------------------------------------------------------------------------------------------------------------------------------------------------------------------------------------------------------------------------------------------------------------------------------------------------------------------------------------------------------------------------------------------------------------------------------------------------------------------------------------------------------------------------------------------------------------------------------------------------------------------------------------------------------------------------------------------------------------------------------------------------------------------------------------------------------------------------------------------------------------------------------------------------------------------------------------------------------------------------------------------------------------------------------------------------------------------------------------------------------------------------------------------------------------------------------------------------------------------------------------------------------------------------------------------------------------------------|
| Favourable experiences   | <p>Rachel, a young girl with diabetes, described having a very good relationship with the diabetic team and ward staff: <i>'Hm, it's just the nurses really like nice. Like, the first night I was staying over they were staying it's a sleepover and stuff.'</i> (Rachel, FG1, line 746 &amp; 747) She acknowledged how continuity of care helped her become more familiar with the staff: <i>'they're always in the clinic when I am there.'</i> (Rachel, FG1, line 678) She commented on how the diabetic team got to know her, by chatting casually and taking an interest in her wider life: <i>'they like asked me what school I'm going to this year' and about 'my baby sister and stuff.'</i> (Rachel, FG1, line 815-819)</p> <p>Participants experienced some HCPs as being easier to talk to than others. Rachel felt that she could talk to the diabetic team: <i>'[...] I can talk to them more 'cos you know them.'</i> (Rachel, FG1, line 621) From the perspective of Laura, a young girl with a recent diagnosis of diabetes, a caring nature was an important factor: <i>'[HCPs who] make you feel as if they care [were easier to talk to].'</i> (Laura, FG2, line 432)</p> | <p>Laura was well informed by her hospital consultant, who had seen her when she was first diagnosed with diabetes: <i>'My consultant like came the day before [...] and he explained the whole thing in detail.'</i> (Laura, FG2, line) Laura's experience of being well informed resembled Rachel's: <i>'The doctor like normally tells me everything that I need to know anyway and they put it in like ways that I like, know.'</i> (Rachel, FG1, line 657 &amp; 658)</p> <p>Sarah, an adolescent with spina bifida and scoliosis, felt she had some control over her treatment: <i>'Uhm, I might have to get the surgery on my back, because I've got scoliosis, em, so if it gets like really, it's not too bad but if it gets worse I have to have surgery so I feel as if I have like a choice because I don't have to have it, and I don't want it. [...] I don't want to have it.'</i> (Sarah, FG2, line 743-748)</p> <p>Although all participants wanted to be informed, the oldest participant, Darren, a young boy with spina bifida and epilepsy, preferred his parents to ask and answer questions, and doctors to make decisions on his behalf:<br/> <i>'GD: Do you ever have any questions [Darren]?'<br/>                 Darren: Ah...don't think so.<br/>                 AT: Are you happy for your parents to ask the questions?<br/>                 Darren: Yeah.<br/>                 AT: And you just listen?<br/>                 Darren: Yeah [smiling and laughing].'</i> (Verbatim excerpt, FG1, line 555-560)</p> |
| Unfavourable experiences | <p>Sarah found it difficult to trust HCPs who were uncaring: <i>'Well yesterday I had to get a line [cannula] in and there was four different doctors that tried [...] and I thought like the doctors didn't really care, they were just gonna get it in, they didn't really care what I was thinking. [...] Well I know they needed to do it. But they didn't care, [...] they didn't care if they hurt me.'</i> (Sarah, FG2, line 438-441 &amp; 512)</p>                                                                                                                                                                                                                                                                                                                                                                                                                                                                                                                                                                                                                                                                                                                                      | <p>During her cannulation experience, Sarah felt angry because HCPs failed to grant her wishes: <i>'I always tell them to put it, try my feet first because I don't have any feeling in my feet [...] I told the doctor not to put it in there and they still did it. [...] I was really cross after it because I thought all that pain.'</i> (Sarah, FG2, line 460-465)</p> <p>Sarah spoke about feeling excluded when a doctor spoke discretely to her mother: <i>'No but it does happen to people like they feel they're left out. [...] Today, [...] a doctor was explaining something to me and he was just about to leave and when he was just about to leave he said to my mum, "If you want to ask a question I can come back" so I kind of thought is he doing that because he doesn't want me to hear my mother asking the question.'</i> (Sarah, FG2, line 612 &amp; 619-622)</p>                                                                                                                                                                                                                                                                                                                                                                                                                                                                                                                                                                                                                                                     |

374 Note: Rachel, Laura, Sarah, and Darren are pseudonyms (participants aged 11-15 years)

375

376 **Box 3 Take-home messages for HCPs**

Focus group participants provided take-home messages about how HCPs, could deliver high-quality child-centred care:

1. *'Explain.'* (Laura, FG2, line 409) *'Explain it in a child friendly way.'* (Sarah, FG2, line 411) *'Because if the child is really young it has to be explained in a different way. At an age you're able to understand [or HCPs will] scare them.'* (Sarah, FG2, line 658-663)
2. *'They should explain what they are going to do before they do it, and like [...] always say who they are and what they're gonna do [...] [and at] what time [...], and explain what was gonna happen and why [...].'* (Rachel, FG1, line 498-510)
3. *'I think just tell everyone together. [...] Because like telling your mum and dad first you'll see the expression on their face and then you're already gonna know.'* (Laura, FG2, line 651-654)
4. *'Always like ask [children] do you have any questions [...] ask [to check understanding].'* (Sarah, FG2, line 388 & 416-417)
5. *'Whenever [children] come in, try and treat them like nicer, em.'* (Darren, FG1, line 992) *'Like treat them the same as everybody else so they all feel the same.'* (Rachel, FG1, line 993)

377 Note: Rachel, Laura, Sarah, and Darren are pseudonyms (participants aged 11-15 years)

378 **DISCUSSION**

379 CADs' experiences were influenced by HCPs forming relationships and involving them:

380 engendering trust and involving CADs satisfied them, made them happier when undergoing  
 381 procedures and treatments, and better able to confide. HCPs did this by being personable, wise,  
 382 and sincere, relating at a personal level, bringing CADs into conversations and decisions, and  
 383 speaking in child-friendly ways. Conversely, not relating to or involving CADs, communicating  
 384 ineffectively by using inappropriately technical language or positioning CADs as 'piggy-in-the-  
 385 middle' between HCPs and parents resulted in CADs being fearful, angry, resistant, and  
 386 disengaged.

387 These findings add to earlier studies, which identified intimate relationships,[77,110,150]  
 388 trust,[77] and involvement,[47,151] as important ingredients of caring well for CADs. They  
 389 corroborate a recent systematic review of decision-making experiences, which found that HCPs  
 390 (and parents) made adolescents feel fearful, anxious, and depersonalised when they withheld

1  
2  
3  
4  
5 391 information or denied involvement.[151] Parents had a significant influence on HCPs'  
6  
7 392 experiences in our study too, by facilitating or impeding communication. Overcoming parental  
8  
9 393 primacy, over-involvement, over-protectiveness,[47,77,151] and wish to withhold information  
10  
11  
12 394 remains a substantial challenge for HCPs.[77]  
13  
14

### 15 395 **Strengths and limitations**

16  
17 396 Our synthesis advances understanding of CADs' experiences of HCPs because of its  
18  
19 397 comprehensiveness, analysis of interrelationships between the nature, origins, and effects of  
20  
21 398 trust and involvement, and its advocacy for CADs' autonomy. It provides a blueprint for CCC,  
22  
23 399 which has, until now, largely depended on theory and expert consensus rather than empirical  
24  
25 400 evidence.[8] Our findings endorse the concept and importance of CCC, whilst showing how  
26  
27 401 much work is needed to put this principle into practice. Our review was innovative in the way it  
28  
29 402 used phenomenology, a theory that is highly relevant to the topic, to inform a rigorous  
30  
31 403 interpretive synthesis. This allows us to go beyond cataloguing publications and draw empirically  
32  
33 404 supported conclusions about how HCPs could care more effectively for CADs. This, we suggest, is  
34  
35 405 a significant contribution to the scholarship of evidence synthesis.  
36  
37  
38  
39  
40

41 406 As with most qualitative syntheses, we present a broad overview, whose findings are potentially  
42  
43 407 transferable across a range of clinical contexts. We took an iterative approach to article  
44  
45 408 selection and ensured adequate time for rigorous interpretive analysis; while some evidence  
46  
47 409 may have been published since we searched the databases, this is an inherent limitation in  
48  
49 410 research that goes to such lengths to analyse a huge evidence-base and synthesise information.  
50  
51 411 We doubt that this materially affects our conclusions since the nature of human relationships  
52  
53 412 are unlikely to change in 12 months. Consulting with stakeholders, whilst obviously desirable, is  
54  
55 413 often omitted from scoping reviews.[152] Our consultation sample was admittedly small and  
56  
57  
58  
59  
60



1  
2  
3  
4  
5 414 relatively homogenous, but participants spoke informatively about their experiences, which  
6  
7 415 helped consolidate and authenticate the findings.  
8  
9

10 416 Our conclusions are susceptible to both publication and interpretation bias because more  
11  
12 417 emotive material tends to attract greater attention. This limitation is partially offset by our  
13  
14 418 rigorous adherence to methodological standards. Another limitation, imposed by the non-  
15  
16 419 specific nature of studies and inexplicit reporting of metadata by primary authors, is that we  
17  
18 420 could not analyse how different types of HCP, or participants' ages or illnesses, affected CADs'  
19  
20 421 experiences. Restricting the scope to English language publications excluded non-English  
21  
22 422 speaking children from distinct cultural groups.[40] This is an important topic for future study.  
23  
24  
25

### 26 423 **Implications for policy, research, and practice**

27  
28  
29 424 Our findings add impetus to the movement to design, deliver, and further characterise child-  
30  
31 425 centred healthcare which has important implications for HCPs, educators, researchers, and  
32  
33 426 policymakers.[153] Our empirical augmentation of this conceptual model supports these  
34  
35 427 initiatives. To achieve the vision of CCC, there is a need for communication strategies, training,  
36  
37 428 assessments, and feedback (from CADs, specifically) at both the undergraduate and  
38  
39 429 postgraduate levels of health professions education. Further research will be needed to address  
40  
41 430 the long-term sustainability and effectiveness of CCC. Evidence on how healthcare policy,  
42  
43 431 practice, and legislation can influence child-centred approaches is long overdue. Further  
44  
45 432 research could also examine how age, illness, gender, and the cultures of different professions  
46  
47 433 influence the drive for CCC. Further implications for practice include the need for HCPs to  
48  
49 434 examine how professional boundaries between themselves and CADs are characterized, and  
50  
51 435 consider how best to respect CADs' preferences when it goes against 'best practice'.  
52  
53  
54  
55

### 56 436 **ABBREVIATIONS**

1  
2  
3  
4  
5 437 CADs- Children and adolescents  
6  
7

8 438 CCC- Child-centred care  
9

10  
11 439 CINAHL- Cumulative Index to Nursing and Allied Health Literature  
12

13  
14 440 FCC- Family-centred care  
15

16  
17 441 HCPs- Healthcare professionals  
18

19  
20 442 PCC- Patient-centred care  
21

22  
23 443 RBHSC- Royal Belfast Hospital for Sick Children  
24

25  
26 444 **DECLARATIONS**  
27

28 445 **Ethics approval and consent to participate**  
29

30  
31 446 Ethical approval for focus groups was obtained from the Office for Research Ethics Committees  
32

33 447 Northern Ireland (reference: 19/NI/0070), while research governance was obtained from the  
34

35  
36 448 Belfast Health and Social Care Trust, Northern Ireland.  
37

38  
39 449 **Consent for publication**  
40

41  
42 450 Consent for publication was gained.  
43

44  
45 451 **Availability of data and materials**  
46

47 452 All data are available in this article, or supplementary materials and open access repositories.  
48  
49

50 453 **Supplementary materials**  
51

52  
53 454 The content has been supplied by the authors.  
54

55  
56 455 **Competing interests**  
57

58  
59 456 None declared.  
60

1  
2  
3  
4  
5 **457 Funding**  
6

7  
8 458 This work was supported by the Royal Belfast Hospital for Sick Children, Charitable Funds  
9  
10 459 Department, by award of a Research Fellowship, grant number 71817005. Funders had no direct  
11  
12 460 involvement with conceptualisation or completion. Queen's University Belfast (QUB) sponsored  
13  
14  
15 461 the study in accordance with the UK Policy Framework for Health and Social Care.  
16

17  
18 **462 Authors' contributions**  
19

20 463 GD conceived the review, sought approvals, secured funding, led the execution, and led the  
21  
22  
23 464 write-up. GD, AT & RC completed the focus groups. MK, RC, AT & TD assisted with data  
24  
25 465 selection, analyses, and manuscript revision. All authors read and approved the final manuscript.  
26

27  
28 **466 Acknowledgements**  
29

30  
31 467 The authors would like to acknowledge Richard Fallis, for his assistance with the search strategy,  
32  
33 468 Richard McCrory, for his advice in the early stages of this review, and Jenne McDonald, for  
34  
35 469 attending the first stakeholder consultation.  
36

37  
38 **470 Authors' information**  
39

40  
41 471 GD is a doctoral student at QUB and recipient of a Research Fellowship Award from the RBHSC.  
42  
43 472 She has obtained a MB Bch BAO, MSc Clinical Education, MRCPCH (membership of RCPCH) and  
44  
45 473 has completed 6 years of paediatric specialty training.  
46

47  
48 474 MK is a General Practitioner, Associate Professor and Director of undergraduate Family  
49  
50  
51 475 Medicine at The University of Calgary.  
52

53  
54 476 RC is a post-doctoral Clinical Academic Lecturer at QUB and a Paediatric Registrar.  
55

56  
57 477 AT is a Paediatric Consultant in RBHSC.  
58

59  
60 478 TD is a Professor of Medical Education at QUB.  
32

479 **REFERENCES**

- 480 1. Wolfe A. Institute of Medicine Report: Crossing the Quality Chasm: A New Health Care  
481 System for the 21st Century. *Policy, Polit Nurs Pract.* 2001;2(3):233–6.
- 482 2. Raleigh V, Foot C. Getting the measure of quality: Opportunities and challenges The King's  
483 Fund [Internet]. 2010;8:9-12. Available from: [www.kingsfund.org.uk/publications](http://www.kingsfund.org.uk/publications)  
484 (accessed 1 September 2020).
- 485 3. Doyle C, Lennox L, Bell D. A systematic review of evidence on the links between patient  
486 experience and clinical safety and effectiveness. *BMJ Open.* 2013;3:e001570.  
487 doi:10.1136/bmjopen-2012-001570.
- 488 4. Little P, Everitt H, Williamson I et al. Preferences of patients for patient centred approach  
489 to consultation in primary care: Observational study. *Br Med J.* 2001;322(7284):468–72.
- 490 5. Coulter A, Fitzpatrick R, Cornwell J. Measures of patients' experience in hospital:  
491 purpose, methods and uses. The King's Fund [Internet]. 2009;(July):1–32. Available from:  
492 [https://www.kingsfund.org.uk/sites/default/files/Point-of-Care-Measures-of-patients-](https://www.kingsfund.org.uk/sites/default/files/Point-of-Care-Measures-of-patients-experience-in-hospital-Kings-Fund-July-2009_0.pdf)  
493 [experience-in-hospital-Kings-Fund-July-2009\\_0.pdf](https://www.kingsfund.org.uk/sites/default/files/Point-of-Care-Measures-of-patients-experience-in-hospital-Kings-Fund-July-2009_0.pdf) (accessed 10 October 2018).
- 494 6. Picker. Influence, inspire, empower: impact report 2017-2018 [Internet]. Oxford; 2018.  
495 Available from: <https://www.picker.org/about-us/> (accessed 30 June 2019).
- 496 7. Carter B, Bray L, Dickinson A et al. Child-Centred Nursing: Promoting Critical Thinking.  
497 London: Sage Publications, Ltd.; 2014.
- 498 8. Coyne I, Holmström I, Söderbäck M. Centeredness in Healthcare: A Concept Synthesis of  
499 Family-centered Care, Person-centered Care and Child-centered Care. *J Pediatr Nurs*  
500 [Internet]. 2018;42:45–56. Available from: <https://doi.org/10.1016/j.pedn.2018.07.001>

- 1  
2  
3  
4  
5 501 9. Pritchard Kennedy A. Systematic ethnography of school-age children with bleeding  
6  
7 502 disorders and other chronic illnesses: exploring children's perceptions of partnership  
8  
9 503 roles in family-centred care of their chronic illness. *Child Care Health Dev.*  
10  
11 504 2012;38(6):863–9.
- 15 505 10. Sommer D, Pramling Samuelsson I, Hundeide K. Early childhood care and education: A  
16  
17 506 child perspective paradigm. *Eur Early Child Educ Res J.* 2013;21(4):459–75.
- 20 507 11. Söderbäck M, Coyne I, Harder M. The importance of including both a child perspective  
21  
22 508 and the child's perspective within health care settings to provide truly child-centred care.  
23  
24 509 *J Child Heal Care.* 2011;15(2):99–106.
- 27 510 12. Hughes JC, Bamford C, May C. Types of centredness in health care: themes and concepts.  
28  
29 511 *Med Heal Care Philos.* 2008;11(4):455–63. Available from:  
30  
31 512 <https://doi.org/10.1007/s11019-008-9131-5>
- 35 513 13. Coyne I, Hallström I, Söderbäck M. Reframing the focus from a family-centred to a child-  
36  
37 514 centred care approach for children's healthcare. *J Child Heal Care.* 2016;20(4):494–502.
- 40 515 14. UNICEF. The United Nations Convention on the Rights of the child. UNICEF; 1990. p. 5.
- 43 516 15. GMC. 0-18 years: Guidance for all doctors [Internet]. London; 2007. Available from:  
44  
45 517 <https://www.gmc-uk.org/->  
46  
47 518 [/media/documents/0\\_18\\_years\\_english\\_0418pdf\\_48903188.pdf](https://www.gmc-uk.org/-/media/documents/0_18_years_english_0418pdf_48903188.pdf) (accessed 2 May 2018).
- 50 519 16. Livesley J, Long T. Children's experiences as hospital in-patients: Voice, competence and  
51  
52 520 work. Messages for nursing from a critical ethnographic study. *Int J Nurs Stud.*  
53  
54 521 2013;50(10):1292–303.
- 57 522 17. Lachman P. Redefining the clinical gaze. *BMJ Qual Saf.* 2013;22(11):888–90.

- 1  
2  
3  
4  
5 523 18. Doukrou M, Segal TY. Fifteen-minute consultation: Communicating with young people -  
6  
7 524 How to use HEEADSSS, a psychosocial interview for adolescents. *Arch Dis Child Educ Pract*  
8  
9 525 *Ed.* 2018;103(1):15–9.
- 12 526 19. Levetown M. Communicating with children and families: From everyday interactions to  
13  
14 527 skill in conveying distressing information. *Pediatrics.* 2008;121(5).
- 18 528 20. Care Quality Commission. 2016 Children and young people’s inpatient and day case survey:  
19  
20 529 Statistical release [Internet]. Newcastle Upon Tyne; 2017. Available from:  
21  
22 530 <https://www.cqc.org.uk/about-us> (accessed 23 Jan 2019).
- 25 531 21. Care Quality Commission. Children and young people’s inpatient and day case survey  
26  
27 532 2014: National results [Internet]. Newcastle Upon Tyne; 2015. p. 1–78. Available from:  
28  
29 533 [https://www.cqc.org.uk/sites/default/files/20150626\\_cypsurvey\\_results\\_tables.pdf](https://www.cqc.org.uk/sites/default/files/20150626_cypsurvey_results_tables.pdf)  
30  
31 534 (accessed 9 Jan 2019).
- 35 535 22. Linney M. RCPCH responds to CQC’s Children and young people’s inpatient and day case  
36  
37 536 survey [Internet]. November. 2017 [cited 2019 Jun 5]. Available from:  
38  
39 537 [https://www.rcpch.ac.uk/news-events/news/rcpch-responds-cqcs-children-young-](https://www.rcpch.ac.uk/news-events/news/rcpch-responds-cqcs-children-young-peoples-inpatient-day-case-survey)  
40  
41 538 [peoples-inpatient-day-case-survey](https://www.rcpch.ac.uk/news-events/news/rcpch-responds-cqcs-children-young-peoples-inpatient-day-case-survey)
- 44 539 23. Lowes L, Eddy D, Channon S, McNamara R, Robling M, Gregory JW, et al. The experience  
45  
46 540 of living with type 1 diabetes and attending clinic from the perception of children,  
47  
48 541 adolescents and carers: analysis of qualitative data from the DEPICTED study. *J Pediatr*  
49  
50 542 *Nurs.* 2015;30(1):54–62.
- 54 543 24. NHS England; NHS Improvement and Coalition for Personalised Care. A co-production  
55  
56 544 model [Internet]. Coalition for Personalised Care. 2020 [cited 2021 Apr 28]. p. 1. Available  
57  
58 545 from: <https://coalitionforpersonalisedcare.org.uk/resources/a-co-production-model/>

- 1  
2  
3  
4  
5 546 25. Kennedy I. Getting it right for children and young people: Overcoming cultural barriers in  
6  
7 547 the NHS so as to meet their needs. 2010;(September):125. Available from:  
8  
9 548 <https://doi.org/10.1037/e610142011-001> (accessed 20 March 2018).  
10  
11  
12 549 26. Royal College of Paediatrics and Child Health. The Development of a Patient Reported  
13  
14 550 Experience Measure for Paediatrics Patients (0-16 years) in Urgent and Emergency Care:  
15  
16 551 Research Report. October 2012 [Internet]. 2012. Available from:  
17  
18 552 [https://www.rcpch.ac.uk/resources/patient-reported-experience-measure-prem-urgent-](https://www.rcpch.ac.uk/resources/patient-reported-experience-measure-prem-urgent-emergency-care)  
19  
20  
21 553 [emergency-care](https://www.rcpch.ac.uk/resources/patient-reported-experience-measure-prem-urgent-emergency-care) (accessed 21 March 2018).  
22  
23  
24 554 27. Roper L, Sherratt FC, Young B et al. Children's views on research without prior consent in  
25  
26 555 emergency situations: A UK qualitative study. *BMJ Open*. 2018 Jun;8:e022894.  
27  
28 556 doi:10.1136/bmjopen-2018-022894 (accessed 14 Aug 2019).  
29  
30  
31 557 28. Royal College of Paediatrics and Health. State of Child Health. 2017;(January):1–134.  
32  
33 558 Available from: [https://www.rcpch.ac.uk/system/files/protected/page/SoCH 2017 UK](https://www.rcpch.ac.uk/system/files/protected/page/SoCH%2017%20UK%20web%20updated.pdf)  
34  
35 559 [web updated.pdf](https://www.rcpch.ac.uk/system/files/protected/page/SoCH 2017 UK web updated.pdf) (accessed 21 Jan 2020).  
36  
37  
38 560 29. Royal College of Paediatrics and Child Health (RCPCH). State of Child Health England-Two  
39  
40 561 Years On. 2019;(January):1–24. Available from: [www.rcpch.ac.uk/state-of-child-health](http://www.rcpch.ac.uk/state-of-child-health)  
41  
42 562 (accessed 21 Jan 2020).  
43  
44  
45 563 30. NHS Digital. NHS Outcomes Framework 2020/21: Indicator and Domain Summary Tables  
46  
47 564 [Internet]. London; 2020. Available from: [https://digital.nhs.uk/data-and-](https://digital.nhs.uk/data-and-information/publications/statistical/nhs-outcomes-framework/august-2020)  
48  
49 565 [information/publications/statistical/nhs-outcomes-framework/august-2020](https://digital.nhs.uk/data-and-information/publications/statistical/nhs-outcomes-framework/august-2020) (accessed 2  
50  
51 566 Sept 2020).  
52  
53  
54  
55 567 31. National Institute of Clinical Excellence. Babies, children and young people's experience  
56  
57 568 of healthcare, Guideline Scope [Internet]. London; 2019. Available from:

- 1  
2  
3  
4  
5 569 <https://www.nice.org.uk/guidance/gid-ng10119/documents/final-scope> (accessed 3 Sept  
6  
7 570 2020).
- 8  
9  
10 571 32. Hargreaves DS, Viner RM. Children's and young people's experience of the National  
11  
12 572 Health Service in England: A review of national surveys 2001-2011. *Arch Dis Child*.  
13  
14 573 2012;97(7):661-6.
- 15  
16  
17 574 33. Hargreaves DS, Sizmur S, Pitchforth J et al. Children and young people's versus parents'  
18  
19 575 responses in an English national inpatient survey. *Arch Dis Child*. 2018;103(5):486-91.
- 20  
21  
22  
23 576 34. Zahavi D. Phenomenology the basics. Routledge; 2018.
- 24  
25  
26 577 35. Arksey H, O'Malley L. Scoping studies: Towards a methodological framework. *Int J Soc Res*  
27  
28 578 *Methodol Theory Pract*. 2005;8(1):19-32.
- 29  
30  
31 579 36. Levac D, Colquhoun H, O'Brien KK. Scoping studies: advancing the methodology.  
32  
33 580 *Implement Sci*. 2010;5(69):1-9.
- 34  
35  
36 581 37. Colquhoun HL, Levac D, O'Brien KK et al. Scoping reviews: Time for clarity in definition,  
37  
38 582 methods, and reporting. *J Clin Epidemiol*. 2014;67(12):1291-4.
- 39  
40  
41 583 38. Gillespie H, Kelly M, Duggan S et al. How do patients experience caring? Scoping review.  
42  
43 584 *Patient Educ Couns*. 2017;100(9):1622-33. Available from:  
44  
45 585 <http://dx.doi.org/10.1016/j.pec.2017.03.029>
- 46  
47  
48 586 39. Morse J. Reframing Rigor in Qualitative Inquiry. In: Denzin NK, Lincoln YS, editors. The  
49  
50 587 SAGE Handbook of Qualitative Research. Fifth. London; 2017.
- 51  
52  
53 588 40. Davison G, Kelly MA, Thompson A et al. Children's and adolescents' experiences of  
54  
55 589 healthcare professionals: scoping review protocol. *BMC Syst Rev*. 2020;1-6. Available  
56  
57 590 from: <https://rdcu.be/b2FFk>



- 1  
2  
3  
4  
5 591 41. Tricco AC, Lillie E, Zarin W et al. PRISMA Extension for Scoping Reviews (PRISMA-ScR):  
6  
7 592 Checklist and Explanation. *Ann Intern Med*. 2018;169(7):467–73.  
8  
9  
10 593 42. Booth A. “Brimful of STARLITE”: Toward standards for reporting literature searches. *J*  
11  
12 594 *Med Libr Assoc*. 2006;94(4):421–30.  
13  
14  
15 595 43. Peters M, Godfrey C, McInerney P et al. Scoping Reviews. In: Aromataris E, Munn Z,  
16  
17 596 editors. Joanna Briggs Institute Reviewer’s Manual [Internet]. JBI; 2017. Available from:  
18  
19 597 <https://doi.org/10.46658/JBIMES-20-12> (accessed 1 May 2020).  
20  
21  
22  
23 598 44. Hardin AP, Hackell JM, Simon GR et al. Age limit of pediatrics. *Pediatrics*. 2017;140(3).  
24  
25  
26 599 45. Sawyer SM, McNeil R, Francis KL et al. The age of paediatrics. *Lancet Child Adolesc Heal*  
27  
28 600 [Internet]. 2019 Nov 1;3(11):822–30. Available from: <https://doi.org/10.1016/S2352->  
29  
30 601 [4642\(19\)30266-4](https://doi.org/10.1016/S2352-4642(19)30266-4) (accessed 10 Jan 2020).  
31  
32  
33 602 46. UNICEF. Adolescents overview [Internet]. UNICEF. 2019 [cited 2021 May 7]. p. 1.  
34  
35 603 Available from: <https://data.unicef.org/topic/adolescents/overview/> (accessed 1 May  
36  
37 604 2021).  
38  
39  
40 605 47. Mays N, Pope C. Qualitative research in health care: Assessing quality in qualitative  
41  
42 606 research. *Br Med J*. 2000;320(7226):50–2.  
43  
44  
45 607 48. Tjaden L, Tong A, Henning P et al. Children’s experiences of dialysis: A systematic review  
46  
47 608 of qualitative studies. *Arch Dis Child*. 2012;97(5):395–402.  
48  
49  
50  
51 609 49. Braun V, Clarke V. Using thematic analysis in psychology. *Qual Res Psychol*. 2006;3(2):77–  
52  
53 610 101.  
54  
55  
56 611 50. Braun V, Clarke V. Successful qualitative research: a practical guide for beginners.  
57  
58 612 London: SAGE Publications Ltd; 2013.

- 1  
2  
3  
4  
5 613 51. QRS International. NVivo Qualitative Data Analysis Software [Internet]. 2021 [cited 2021  
6  
7 614 Jan 20]. p. 1. Available from: [https://www.qsrinternational.com/nvivo-qualitative-data-](https://www.qsrinternational.com/nvivo-qualitative-data-analysis-software/home)  
8  
9 615 [analysis-software/home](https://www.qsrinternational.com/nvivo-qualitative-data-analysis-software/home)  
10  
11  
12 616 52. Scherer KR, Shuman V et al. The GRID meets the wheel: assessing emotional feeling via  
13  
14 617 self-report. In: J.J.R. Fontaine, K.R. Scherer & C. Soriano. Components of emotional  
15  
16 618 meaning: A sourcebook. Oxford University Press, 2013;315–38.  
17  
18 619 doi:10.1093/acprof:oso/9780199592746.003.0019  
19  
20  
21  
22 620 53. Plutchik R. The nature of emotions: Human emotions have deep evolutionary roots, a  
23  
24 621 fact that may explain their complexity and provide tools for clinical practice. *Am Sci*.  
25  
26 622 2001;89(4):344–50.  
27  
28  
29 623 54. Gillespie H, Kelly M, Gormley G et al. How can tomorrow’s doctors be more caring? A  
30  
31 624 phenomenological investigation. *Med Educ*. 2018;52(10):1052–63.  
32  
33  
34 625 55. Aalsma MC, Brown JR, Holloway ED et al. Connection to mental health care upon  
35  
36 626 community reentry for detained youth: a qualitative study. *BMC Public Health*.  
37  
38 627 2014;14:117.  
39  
40  
41  
42 628 56. Alex MR, Ritchie JA. School-aged children’s interpretation of their experience with acute  
43  
44 629 surgical pain. *J Pediatr Nurs*. 1992;7:171–80.  
45  
46  
47 630 57. Anderson SM, Wray J, Ralph A et al. Experiences of adolescent lung transplant recipients:  
48  
49 631 A qualitative study. *Pediatr Transplant*. 2017;21(3).  
50  
51  
52 632 58. Ångström-Brännström C, Norberg A, Jansson L. Narratives of Children With Chronic  
53  
54 633 Illness About Being Comforted. *J Pediatr Nurs*. 2008;23(4):310–6.  
55  
56  
57 634 59. Ångström-Brännstrom C, Norberg A. Children Undergoing Cancer Treatment Describe  
58  
59  
60

- 1  
2  
3  
4  
5 635 Their Experiences of Comfort in Interviews and Drawings. *J Pediatr Oncol Nurs*.  
6  
7 636 2014;31(3):135–46.  
8  
9  
10 637 60. Beresford BA, Sloper P. Chronically ill adolescents' experiences of communicating with  
11  
12 638 doctors: A qualitative study. *J Adolesc Heal*. 2003;33(3):172–9.  
13  
14  
15 639 61. Boyd JR, Hunsberger M. Chronically ill children coping with repeated hospitalizations:  
16  
17 640 their perceptions and suggested interventions. *J Pediatr Nurs*. 1998;13(6):330–42.  
18  
19  
20 641 62. Brown JR, Holloway ED, Akakpo TF et al. "Straight up": enhancing rapport and  
21  
22 642 therapeutic alliance with previously-detained youth in the delivery of mental health  
23  
24 643 services. *Community Ment Health J*. 2014;50(2):193–203.  
25  
26  
27 644 63. Carney T, Murphy S, McClure J et al. Children's views of hospitalization: an exploratory  
28  
29 645 study of data collection. *J Child Heal Care*. 2003;7:27–40.  
30  
31  
32 646 64. Cheng S, Foster R, Hester N et al. A qualitative inquiry of Taiwanese children's pain  
33  
34 647 experiences. *J Nurs Res*. 2003;11(4):241–50.  
35  
36  
37 648 65. Cheng Y-C, Huang C-Y, Wu W-W et al. The lived experiences of aboriginal adolescent  
38  
39 649 survivors of childhood cancer during the recovering process in Taiwan: A descriptive  
40  
41 650 qualitative research. *Eur J Oncol Nurs*. 2016;22:78–84.  
42  
43  
44 651 66. Christofides E, Dobson JA, Solomon M et al. Heuristic decision-making about research  
45  
46 652 participation in children with cystic fibrosis. *Soc Sci Med*. 2016;162:32–40.  
47  
48  
49 653 67. Clift L, Dampier S, Timmons S. Adolescents' experiences of emergency admission to  
50  
51 654 children's wards. *J Child Heal Care*. 2007;11(3):195–207.  
52  
53  
54 655 68. Colver A, Pearse R, Watson RM et al. How well do services for young people with long  
55  
56 656 term conditions deliver features proposed to improve transition? *BMC Health Serv Res*.  
57  
58  
59  
60

- 1  
2  
3  
4  
5 657 2018 May;18. (accessed 8 Feb 2019).  
6  
7  
8 658 69. Corsano P, Cigala A, Majorano M et al. Speaking about emotional events in hospital: The  
9  
10 659 role of health-care professionals in children emotional experiences. *J Child Heal Care*.  
11  
12 660 2015;19(1):84–92.  
13  
14  
15 661 70. Coyne I, Hayes E, Gallagher P et al. Giving Children a Voice: Investigation of Children’s  
16  
17 662 Experiences of Participation in Consultation and Decision-making in Irish Hospitals  
18  
19 663 [Internet]. Office of the Minister for Children. 2006. Available from:  
20  
21 664 <http://eprints.hud.ac.uk/id/eprint/25352/> (accessed 18 Jan 2018).  
22  
23  
24  
25 665 71. Coyne I. Children’s experiences of hospitalization. *J Child Heal Care*. 2006;10(4):326–36.  
26  
27  
28 666 72. Coyne I. Consultation with children in hospital: Children, parents’ and nurses’  
29  
30 667 perspectives. *J Clin Nurs*. 2006;15(1):61–71.  
31  
32  
33 668 73. Coyne I, Conlon J. Children’s and young people’s views of hospitalization: ‘It’s a scary  
34  
35 669 place.’ *J Child Young People’s Nurs*. 2007;1(1):16–21.  
36  
37  
38 670 74. Coyne I, Gallagher P. Participation in communication and decision-making: children and  
39  
40 671 young people’s experiences in a hospital setting. *J Clin Nurs*. 2011;20(15/16):2334–43.  
41  
42  
43 672 75. Coyne I, Kirwan L. Ascertaining children’s wishes and feelings about hospital life. *J Child*  
44  
45 673 *Health Care*. 2012;16(3):293–304.  
46  
47  
48 674 76. Coyne I, Amory A, Kiernan G et al. Children’s participation in shared decision-making:  
49  
50 675 children, adolescents, parents and healthcare professionals’ perspectives and  
51  
52 676 experiences. *Eur J Oncol Nurs*. 2014;18(3):273–80.  
53  
54  
55  
56 677 77. Coyne I, McNamara N, Healy M et al. Adolescents’ and parents’ views of Child and  
57  
58 678 Adolescent Mental Health Services (CAMHS) in Ireland. *J Psychiatr Ment Health Nurs*.  
59  
60

- 1  
2  
3  
4  
5 679 2015;22(8):561–9.  
6  
7  
8 680 78. Coyne I, Amory A, Gibson F et al. Information-sharing between healthcare professionals,  
9  
10 681 parents and children with cancer: more than a matter of information exchange. *Eur J*  
11  
12 682 *Cancer Care (Engl)*. 2016;25(1):141–56.  
13  
14  
15 683 79. Curtis P, Northcott A. The impact of single and shared rooms on family-centred care in  
16  
17 684 children’s hospitals. *J Clin Nurs*. 2017;26(11–12):1584–96.  
18  
19  
20 685 80. Das A, Detels R, Javanbakht M et al. Living with HIV in West Bengal, India: perceptions of  
21  
22 686 infected children and their caregivers. *AIDS Care*. 2017;29(6):800–6.  
23  
24  
25 687 81. Day C, Carey M, Surgenor T. Children’s key concerns: Piloting a qualitative approach to  
26  
27 688 understanding their experience of mental health care. *Clin Child Psychol Psychiatry*.  
28  
29 689 2006;11(1):139–55.  
30  
31  
32 690 82. Dell’Api M, Rennick J, Rosmus C. Childhood chronic pain and health care professional  
33  
34 691 interactions: shaping the chronic pain experiences of children. *J Child Heal Care*.  
35  
36 692 2007;11(4):269–86.  
37  
38  
39 693 83. Dixon-Woods M, Anwar Z, Young B et al. Lay evaluation of services for childhood asthma.  
40  
41 694 *Health Soc Care Community*. 2002;10(6):503–11.  
42  
43  
44 695 84. Edgecombe K, Latter S, Peters S et al. Health experiences of adolescents with  
45  
46 696 uncontrolled severe asthma. *Arch Dis Child*. 2010;95(12):985–91.  
47  
48  
49 697 85. Ekra EMR, Gjengedal E. Being hospitalized with a newly diagnosed chronic illness-A  
50  
51 698 phenomenological study of children’s lifeworld in the hospital. *Int J Qual Stud Health*  
52  
53 699 *Well-being*. 2012;7(4898):1–9.  
54  
55  
56 700 86. Engvall G, Ångström-Brännström C, Mullaney T et al. It is tough and tiring but it works-

- 1  
2  
3  
4  
5 701 children's experiences of undergoing radiotherapy. *PLoS One*. 2016;11(4).  
6  
7  
8 702 87. Forsner M, Jansson L, Sørli V. The experience of being ill as narrated by hospitalized  
9  
10 703 children aged 7-10 years with short-term illness. *J Child Heal Care*. 2005;9(2):153–65.  
11  
12  
13 704 88. Forsner M, Jansson L, Söderberg A. Afraid of Medical Care. School-Aged Children's  
14  
15 705 Narratives About Medical Fear. *J Pediatr Nurs*. 2009;24(6):519–28.  
16  
17  
18 706 89. Garth B, Murphy GC, Reddihough DS. Perceptions of participation: Child patients with a  
19  
20 707 disability in the doctor-parent-child partnership. *Patient Educ Couns*. 2009;74(1):45–52.  
21  
22  
23 708 90. Gill F, Butler S, Pistrang N. The experience of adolescent inpatient care and the  
24  
25 709 anticipated transition to the community: Young people's perspectives. *J Adolesc*.  
26  
27 710 2016;46:57–65.  
28  
29  
30  
31 711 91. Griffiths M, Schweitzer R, Yates P. Childhood experiences of cancer: An interpretative  
32  
33 712 phenomenological analysis approach. *J Pediatr Oncol Nurs* [Internet]. 2011;28(2):83–92.  
34  
35 713 Available from: <https://doi.org/10.1177/1043454210377902> (accessed 16 Aug 2019).  
36  
37  
38 714 92. Haase J, Rostad M. Experiences of completing cancer therapy: Children's Perspectives.  
39  
40 715 *Oncol Nurs Forum*. 1994;21:1483–92.  
41  
42  
43 716 93. Hall MJ, Gibson BJ, James A et al. Children's and Adolescents' Perspectives on Cleft Lip  
44  
45 717 and/or Palate. *Cleft Palate-craniofacial J*. 2013 Mar;50(2):E18–26.  
46  
47  
48 718 94. Han J, Liu J-E, Xiao Q et al. The Experiences and Feelings of Chinese Children Living With  
49  
50 719 Leukemia A Qualitative Study. *Cancer Nurs*. 2011;34(2):134–41.  
51  
52  
53 720 95. Hanson A, Drendel AL. A qualitative study of the at-home pain experience for children  
54  
55 721 with an arm fracture. *Paediatr Child Heal*. 2017;22(4):207–10.  
56  
57  
58 722 96. Harper B, Dickson J, Bramwell R. Experiences of young people in a 16-18 Mental Health  
59  
60 43

- 1  
2  
3  
4  
5 723 Service. *Child Adolesc Ment Health*. 2014;19:90–6.  
6  
7  
8 724 97. Hart T, O'Reilly M. 'The challenges of sharing information when a young person is  
9  
10 725 experiencing severe emotional difficulties': implications for schools and CAMHS. *Child*  
11  
12 726 *Adolesc Ment Health*. 2018;23(3):235–42.  
13  
14  
15 727 98. Hawthorne K, Bennert K, Lowes L et al. The experiences of children and their parents in  
16  
17 728 paediatric diabetes services should inform the development of communication skills for  
18  
19 729 healthcare staff (the DEPICTED Study). *Diabet Med*. 2011;28(9):1103–8.  
20  
21  
22  
23 730 99. Hinton D, Kirk S. Paediatric multiple sclerosis: a qualitative study of families' diagnosis  
24  
25 731 experiences. *Arch Dis Child*. 2015;100(7):623–9.  
26  
27  
28 732 100. Hodgins M, Lander J. Children's Coping with Venipuncture. *J Pain Symptom Manage*.  
29  
30 733 1997;13(5):274–85.  
31  
32  
33 734 101. Hutton A. Consumer perspectives in adolescent ward design. *J Clin Nurs*. 2005;14(5):537–  
34  
35 735 45.  
36  
37  
38 736 102. Jachyra P, Anagnostou E, Knibbe TJ et al. "Girls don't have big tummies": The experiences  
39  
40 737 of weight-related discussions for children with autism spectrum disorders. *Autism*.  
41  
42 738 2018;00(0):1–10.  
43  
44  
45 739 103. Jachyra P, Anagnostou E, Knibbe TJ et al. Weighty Conversations: Caregivers', Children's,  
46  
47 740 and Clinicians' Perspectives and Experiences of Discussing Weight-Related Topics in  
48  
49 741 Healthcare Consultations. *Autism Res*. 2018 Nov;11(11):1500–10.  
50  
51  
52  
53 742 104. Jensen CS, Jackson K, Kolbæk R et al. Children's experiences of acute hospitalisation to a  
54  
55 743 paediatric emergency and assessment unit - A qualitative study. *J Child Heal Care*.  
56  
57 744 2012;16(3):263–73.  
58  
59  
60

- 1  
2  
3  
4  
5 745 105. Jongudomkarn D, Aungsupakorn N, Camfield L. The meanings of pain: A qualitative study  
6  
7 746 of the perspectives of children living with pain in north-eastern Thailand. *Nurs Heal Sci*.  
8  
9 747 2006;8(3):156–63.  
10  
11  
12 748 106. Kluthe C, Isaac D, Hiller K et al. Qualitative Analysis of Pediatric Patient and Caregiver  
13  
14 749 Perspectives After Recent Diagnosis With Inflammatory Bowel Disease. *J Pediatr Nurs*.  
15  
16 750 2018;38:106–13.  
17  
18  
19 751 107. Koller D, Nicholas D, Gearing R et al. Paediatric pandemic planning: children’s  
20  
21 752 perspectives and recommendations. *Health Soc Care Community*. 2010;18(4):369–77.  
22  
23  
24 753 108. Koller D. “Kids need to talk too”: inclusive practices for children’s healthcare education  
25  
26 754 and participation. *J Clin Nurs*. 2017;26(17–18):2657–68.  
27  
28  
29 755 109. Kortessluoma R, Nikkonen M. “The most disgusting ever”: Children’s pain descriptions and  
30  
31 756 views of the purpose of pain. *J Child Heal Care*. 2006;10(3):213–27.  
32  
33  
34 757 110. Kortessluoma R-L, Nikkonen M, Serlo W. “You Just Have to Make the Pain Go Away”-  
35  
36 758 Children’s Experiences of Pain Management. *Pain Manag Nurs*. 2008;9(4):143-149.e5.  
37  
38  
39 759 111. Lewis P, Kelly M, Wilson V et al. What did they say? How children, families and nurses  
40  
41 760 experience ‘care.’ *J Child Young People’s Nurs*. 2007;1(6):259–66.  
42  
43  
44 761 112. Macartney G, Stacey D, Harrison MB et al. Symptoms, coping, and quality of life in  
45  
46 762 pediatric brain tumor survivors: A qualitative study. *Oncol Nurs Forum*. 2014;41(4):390–8.  
47  
48  
49 763 113. Manookian A, Nasrabadi AN, Asadi M. Children’s lived experiences of hematopoietic  
50  
51 764 stem cell transplantation. *Nurs Heal Sci*. 2014;16(3):314–20.  
52  
53  
54 765 114. Marcinowicz L, Abramowicz P, Zarzycka D et al. How hospitalized children and parents  
55  
56 766 perceive nurses and hospital amenities: A qualitative descriptive study in Poland. *J Child*  
57  
58  
59  
60



- 1  
2  
3  
4  
5 767 *Heal Care*. 2016;20(1):120–8.  
6  
7  
8 768 115. Marshman Z, Gibson BJ, Benson PE. Is the short-form child perceptions questionnaire  
9  
10 769 meaningful and relevant to children with malocclusion in the UK? *J Orthod*.  
11  
12 770 2010;37(1):29–36.  
13  
14  
15 771 116. McNelis AM, Buelow J, Myers J et al. Concerns and needs of children with epilepsy and  
16  
17 772 their parents. *Clin Nurse Spec*. 2007;21(4):195–202.  
18  
19  
20 773 117. McPherson AC, Swift JA, Peters M et al. Communicating about obesity and weight-related  
21  
22 774 topics with children with a physical disability and their families: spina bifida as an  
23  
24 775 example. *Disabil Rehabil*. 2017;39(8):791–7.  
25  
26  
27  
28 776 118. McPherson AC, Knibbe TJ, Oake M et al. “Fat is really a four-letter word”: Exploring  
29  
30 777 weight-related communication best practices in children with and without disabilities and  
31  
32 778 their caregivers. *Child Care Health Dev*. 2018;44(4):636–43.  
33  
34  
35 779 119. Moules T. “They wouldn’t know how it feels...”: Characteristics of quality care from  
36  
37 780 young people’s perspectives: A participatory research project. *J Child Heal Care*.  
38  
39 781 2009;13(4):322–32.  
40  
41  
42  
43 782 120. Nguyen TN, Nilsson S, Hellström A-L et al. Music therapy to reduce pain and anxiety in  
44  
45 783 children with cancer undergoing lumbar puncture: A randomized clinical trial. *J Pediatr*  
46  
47 784 *Oncol Nurs*. 2010;27(3):146–55.  
48  
49  
50 785 121. Nilsson S, Hallqvist C, Sidenvall B et al. Children’s experiences of procedural pain  
51  
52 786 management in conjunction with trauma wound dressings. *J Adv Nurs*. 2011;67(7):1449–  
53  
54 787 57.  
55  
56  
57 788 122. Norena Pena AL, Cibanal Juan L. The experience of hospitalized children regarding their  
58  
59  
60

- 1  
2  
3  
4  
5 789 interactions with nursing professionals. *Rev Lat Am Enfermagem*. 2011;19(6):1429–36.  
6  
7  
8 790 123. Noreña Peña AL, Rojas JG. Ethical aspects of children’s perceptions of information-giving  
9  
10 791 in care. *Nurs Ethics*. 2014;21(2):245–56.  
11  
12  
13 792 124. Olausson B, Utbult Y, Hansson S et al. Transplanted children’s experiences of daily living:  
14  
15 793 Children’s narratives about their lives following transplantation. *Pediatr Transplant*.  
16  
17 794 2006;10(5):575–85.  
18  
19  
20 795 125. Pelander T, Leino-Kilpi H. Quality in pediatric nursing care: Children’s expectations.  
21  
22 796 *Compr Child Adolesc Nurs*. 2004;27(3):139–51.  
23  
24  
25 797 126. Pelander T, Leino-Kilpi H. Children’s best and worst experiences during hospitalisation.  
26  
27 798 *Scand J Caring Sci*. 2010;24(4):726–33.  
28  
29  
30 799 127. Pölkki T, Pietilä A, Rissanen L et al. Pain in children: qualitative research of Finnish school-  
31  
32 800 aged children’s experiences of pain in hospital. *Int J Nurs Pract*. 1999;5(1):21–8.  
33  
34  
35 801 128. Pope N, Tallon M, Leslie G et al. Ask me: Children’s experiences of pain explored using  
36  
37 802 the draw, write, and tell method. *J Spec Pediatr Nurs*. 2018 Jul;23:e12218.  
38  
39 803 <https://doi.org/10.1111/jspn.12218> (accessed 8 Feb 2019).  
40  
41  
42 804 129. Randall D. Children’s regard for nurses and nursing: A mosaic of children’s views on  
43  
44 805 community nursing. *J Child Heal Care*. 2012;16(1):91–104.  
45  
46  
47 806 130. Rankin D, Harden J, Barnard KD et al. Pre-adolescent children’s experiences of receiving  
48  
49 807 diabetes-related support from friends and peers: A qualitative study. *Heal Expect*. 2018  
50  
51 808 Oct;21(5):870–7.  
52  
53  
54 809 131. Ruhe KM, Wangmo T, De Clercq E et al. Putting patient participation into practice in  
55  
56 810 pediatrics-results from a qualitative study in pediatric oncology. *Eur J Pediatr*.  
57  
58  
59  
60

- 1  
2  
3  
4  
5 811 2016;175(9):1147–55.  
6  
7  
8 812 132. Ryals J. Liberated voices: Juvenile offenders' perceptions of therapeutic relationships. *J*  
9  
10 813 *Theor Philos Criminol.* 2011;3(2):1–26.  
11  
12  
13 814 133. Saarikoski A, Koppeli R, Salanterä S et al. Voiding school as a treatment of daytime  
14  
15 815 incontinence or enuresis: Children's experiences of the intervention. *J Pediatr Urol.*  
16  
17 816 2018;14(1):56.e1-56.e7.  
18  
19  
20 817 134. Salmela M, Aronen ET, Salanterä S. The experience of hospital-related fears of 4- to 6-  
21  
22 818 year-old children. *Child Care Health Dev.* 2010;37(5):719–26.  
23  
24  
25 819 135. Schalkers I, Dedding CWM, Bunders JFG. "[I would like] a place to be alone, other than  
26  
27 820 the toilet" - Children's perspectives on paediatric hospital care in the Netherlands. *Heal*  
28  
29 821 *Expect.* 2014;18(6):2066–78.  
30  
31  
32  
33 822 136. Schmidt C, Bernaix L, Koski A et al. Hospitalized Children's Perceptions of Nurses and  
34  
35 823 Nurse Behaviours. *Am J Matern Child Nurs.* 2007;32(6):336–42.  
36  
37  
38 824 137. Spalding J, Yardley S. 'The nice thing about doctors is that you can sometimes get a day  
39  
40 825 off school': an action research study to bring lived experiences from children, parents and  
41  
42 826 hospice staff into medical students' preparation for practice. *BMJ Support Palliat Care.*  
43  
44 827 2016 Dec;6(4):459–64.  
45  
46  
47  
48 828 138. Stevens B, McKeever P, Law MP et al. Children receiving chemotherapy at home:  
49  
50 829 Perceptions of children and parents. *J Pediatr Oncol Nurs.* 2006;23(5):276–85.  
51  
52  
53 830 139. Taylor RM, Franck LS, Dhawan A et al. The stories of young people living with a liver  
54  
55 831 transplant. *Qual Health Res.* 2010;20(8):1076–90.  
56  
57  
58 832 140. Vejzovic V, Wennick A, Idvall E et al. A private affair: Children's experiences prior to  
59  
60

- 1  
2  
3  
4  
5 833 colonoscopy. *J Clin Nurs*. 2014;24(7–8):1038–47.  
6  
7  
8 834 141. Vindrola-Padros C. The Everyday Lives of Children with Cancer in Argentina: Going  
9  
10 835 beyond the Disease and Treatment. *Child Soc*. 2012;26(6):430–42.  
11  
12  
13 836 142. Wangmo T, Ruhe KM, Badarau DO et al. Parents' and patients' experiences with  
14  
15 837 paediatric oncology care in Switzerland--satisfaction and some hurdles. *Swiss Med Wkly*.  
16  
17 838 2016;146:w14309. <https://dx.doi.org/10.4414/smw.2016.14309> (accessed 15 Feb 2018).  
19  
20 839 143. Watson AC, Kelly BL, Vidalon TM. Examining the meaning attached to mental illness and  
21  
22 840 mental health services among justice system-involved youth and their parents. *Qual*  
23  
24 841 *Health Res*. 2009;19(8):1087–99.  
25  
26  
27 842 144. Wen SQ, Taylor BJ, Lixia Z et al. Children's experiences of their postoperative pain  
28  
29 843 management: A qualitative systematic review. *JBI Database Syst Rev Implement Reports*.  
30  
31 844 2013;22(7):958–968.  
32  
33  
34 845 145. Wise B. In their own words: the lived experience of pediatric liver transplantation. *Qual*  
35  
36 846 *Health Res*. 2002;12(1):74–90.  
37  
38  
39 847 146. Wong EMY, Sit JWH, Tarrant MA et al. The perceptions of obese school children in Hong  
40  
41 848 Kong toward their weight-loss experience. *J Sch Nurs*. 2012;28(5):370–8.  
42  
43  
44 849 147. Woodgate RL. Feeling states: a new approach to understanding how children and  
45  
46 850 adolescents with cancer experience symptoms. *Cancer Nurs*. 2008;31(3):229–38.  
47  
48  
49 851 148. Wray J, Hobden S, Knibbs S et al. Hearing the voices of children and young people to  
50  
51 852 develop and test a patient-reported experience measure in a specialist paediatric setting.  
52  
53 853 *Arch Dis Child*. 2018;103:272–9.  
54  
55  
56 854 149. Xie A, Shan Y, Niu M et al. Experience and nursing needs of school-age children  
57  
58  
59  
60

- 1  
2  
3  
4  
5 855 undergoing lumbar puncture during the treatment of acute lymphoblastic leukaemia: a  
6  
7 856 descriptive and qualitative study. *J Clin Nurs*. 2016 Nov;26(21–22):3328–35.  
8  
9  
10 857 150. Young B, Dixon-woods M, Windridge KC et al. Managing communication with young  
11  
12 858 people who have a life threatening chronic illness: a qualitative study of patients and  
13  
14 859 parents. *Br Med J*. 2003;326(7384):305.  
15  
16  
17 860 151. Corsano P, Majorano M, Vignola V et al. Hospitalized children’s representations of their  
18  
19 861 relationship with nurses and doctors. *J Child Heal Care*. 2013;17(3):294–304.  
20  
21  
22 862 152. Jordan A, Wood F, Edwards A et al. What adolescents living with long-term conditions say  
23  
24 863 about being involved in decision-making about their healthcare: A systematic review and  
25  
26 864 narrative synthesis of preferences and experiences. *Patient Educ Couns* [Internet].  
27  
28 865 2018;101(10):1725–35. Available from: <http://dx.doi.org/10.1016/j.pec.2018.06.006>  
29  
30  
31 866 153. Pham MT, Rajić A, Greig JD et al. A scoping review of scoping reviews: Advancing the  
32  
33 867 approach and enhancing the consistency. *Res Synth Methods*. 2014;5(4):371–85.  
34  
35  
36 868 154. Ford K, Campbell S, Carter B et al. The concept of child-centered care in healthcare: a  
37  
38 869 scoping review protocol. *JBI database Syst Rev Implement reports*. 2018;16(4):845–51.  
39  
40  
41  
42

43 **FIGURE CAPTIONS**

44  
45  
46 871 Figure 1 PRISMA flow diagram  
47  
48  
49  
50  
51  
52  
53  
54  
55  
56  
57  
58  
59  
60

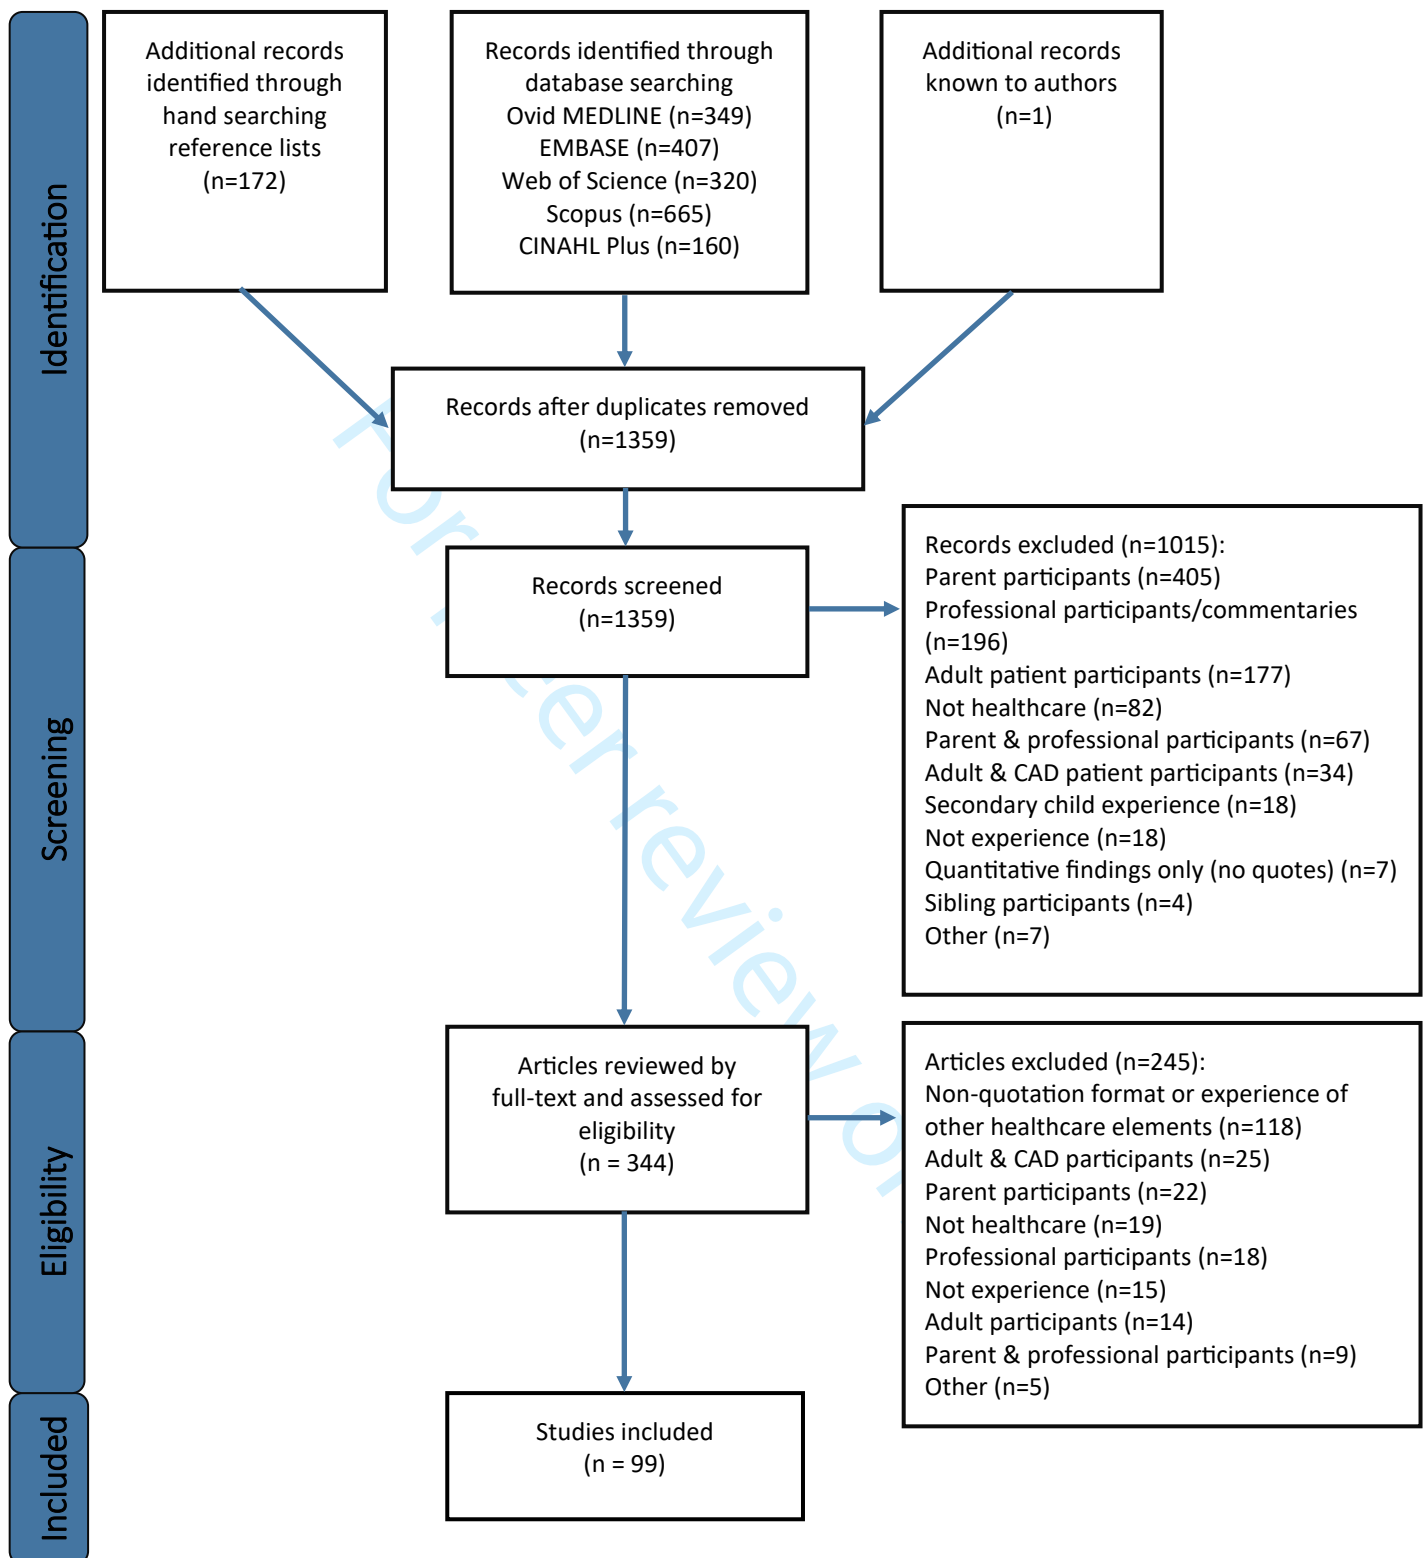

Note 'Other' (n=12) reasons for excluding records/articles included: participants' ages unclear (n=4); no full-text available or unobtainable in English (n=7); same study as included article (n=1).

### PRISMA-ScR Checklist

This supplementary information includes the Preferred Reporting Items for Systematic reviews and Meta-Analyses extension for Scoping Reviews (PRISMA-ScR) Checklist (1).

| SECTION                           | ITEM | PRISMA-ScR CHECKLIST ITEM                                                                                                                                                                                                                                                                                  | REPORTED ON PAGE # (untracked version)                             |
|-----------------------------------|------|------------------------------------------------------------------------------------------------------------------------------------------------------------------------------------------------------------------------------------------------------------------------------------------------------------|--------------------------------------------------------------------|
| <b>TITLE</b>                      |      |                                                                                                                                                                                                                                                                                                            |                                                                    |
| Title                             | 1    | Identify the report as a scoping review.                                                                                                                                                                                                                                                                   | p.1                                                                |
| <b>ABSTRACT</b>                   |      |                                                                                                                                                                                                                                                                                                            |                                                                    |
| Structured summary                | 2    | Provide a structured summary that includes (as applicable): background, objectives, eligibility criteria, sources of evidence, charting methods, results, and conclusions that relate to the review questions and objectives.                                                                              | p.3-4, background not required in abstract as per journal guidance |
| <b>INTRODUCTION</b>               |      |                                                                                                                                                                                                                                                                                                            |                                                                    |
| Rationale                         | 3    | Describe the rationale for the review in the context of what is already known. Explain why the review questions/objectives lend themselves to a scoping review approach.                                                                                                                                   | p.6-8                                                              |
| Objectives                        | 4    | Provide an explicit statement of the questions and objectives being addressed with reference to their key elements (e.g., population or participants, concepts, and context) or other relevant key elements used to conceptualize the review questions and/or objectives.                                  | p.8 & 9                                                            |
| <b>METHODS</b>                    |      |                                                                                                                                                                                                                                                                                                            |                                                                    |
| Protocol and registration         | 5    | Indicate whether a review protocol exists; state if and where it can be accessed (e.g., a Web address); and if available, provide registration information, including the registration number.                                                                                                             | p.9 and reference list. Not registered.                            |
| Eligibility criteria              | 6    | Specify characteristics of the sources of evidence used as eligibility criteria (e.g., years considered, language, and publication status), and provide a rationale.                                                                                                                                       | p.9-12 (Table 2)                                                   |
| Information sources*              | 7    | Describe all information sources in the search (e.g., databases with dates of coverage and contact with authors to identify additional sources), as well as the date the most recent search was executed.                                                                                                  | p. 9 & 10 (Table 1)                                                |
| Search                            | 8    | Present the full electronic search strategy for at least 1 database, including any limits used, such that it could be repeated.                                                                                                                                                                            | p. 9 & 10, Supp file 2                                             |
| Selection of sources of evidence† | 9    | State the process for selecting sources of evidence (i.e., screening and eligibility) included in the scoping review.                                                                                                                                                                                      | p. 10 & 11                                                         |
| Data charting process‡            | 10   | Describe the methods of charting data from the included sources of evidence (e.g., calibrated forms or forms that have been tested by the team before their use, and whether data charting was done independently or in duplicate) and any processes for obtaining and confirming data from investigators. | p. 13 (box 2)                                                      |
| Data items                        | 11   | List and define all variables for which data were                                                                                                                                                                                                                                                          | p. 13                                                              |

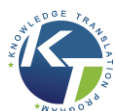

| SECTION                                               | ITEM | PRISMA-ScR CHECKLIST ITEM                                                                                                                                                                             | REPORTED ON PAGE # (untracked version)         |
|-------------------------------------------------------|------|-------------------------------------------------------------------------------------------------------------------------------------------------------------------------------------------------------|------------------------------------------------|
|                                                       |      | sought and any assumptions and simplifications made.                                                                                                                                                  |                                                |
| Critical appraisal of individual sources of evidence§ | 12   | If done, provide a rationale for conducting a critical appraisal of included sources of evidence; describe the methods used and how this information was used in any data synthesis (if appropriate). | Critical appraisal not done. Rationale on p.11 |
| Synthesis of results                                  | 13   | Describe the methods of handling and summarizing the data that were charted.                                                                                                                          | p. 13-15                                       |
| <b>RESULTS</b>                                        |      |                                                                                                                                                                                                       |                                                |
| Selection of sources of evidence                      | 14   | Give numbers of sources of evidence screened, assessed for eligibility, and included in the review, with reasons for exclusions at each stage, ideally using a flow diagram.                          | p. 15 (Figure 1)                               |
| Characteristics of sources of evidence                | 15   | For each source of evidence, present characteristics for which data were charted and provide the citations.                                                                                           | p. 15 (Table 2)                                |
| Critical appraisal within sources of evidence         | 16   | If done, present data on critical appraisal of included sources of evidence (see item 12).                                                                                                            | N/A                                            |
| Results of individual sources of evidence             | 17   | For each included source of evidence, present the relevant data that were charted that relate to the review questions and objectives.                                                                 | p. 15 (Table 2) & Dryad data                   |
| Synthesis of results                                  | 18   | Summarize and/or present the charting results as they relate to the review questions and objectives.                                                                                                  | p. 15, 16, 23-26, & supp file 4.               |
| <b>DISCUSSION</b>                                     |      |                                                                                                                                                                                                       |                                                |
| Summary of evidence                                   | 19   | Summarize the main results (including an overview of concepts, themes, and types of evidence available), link to the review questions and objectives, and consider the relevance to key groups.       | p. 29-30                                       |
| Limitations                                           | 20   | Discuss the limitations of the scoping review process.                                                                                                                                                | P. 30-31                                       |
| Conclusions                                           | 21   | Provide a general interpretation of the results with respect to the review questions and objectives, as well as potential implications and/or next steps.                                             | p. 31                                          |
| <b>FUNDING</b>                                        |      |                                                                                                                                                                                                       |                                                |
| Funding                                               | 22   | Describe sources of funding for the included sources of evidence, as well as sources of funding for the scoping review. Describe the role of the funders of the scoping review.                       | p. 32                                          |

JBI = Joanna Briggs Institute; PRISMA-ScR = Preferred Reporting Items for Systematic reviews and Meta-Analyses extension for Scoping Reviews.

\* Where *sources of evidence* (see second footnote) are compiled from, such as bibliographic databases, social media platforms, and Web sites.

† A more inclusive/heterogeneous term used to account for the different types of evidence or data sources (e.g., quantitative and/or qualitative research, expert opinion, and policy documents) that may be eligible in a scoping review as opposed to only studies. This is not to be confused with *information sources* (see first footnote).

‡ The frameworks by Arksey and O'Malley (6) and Levac and colleagues (7) and the JBI guidance (4, 5) refer to the process of data extraction in a scoping review as data charting.

§ The process of systematically examining research evidence to assess its validity, results, and relevance before using it to inform a decision. This term is used for items 12 and 19 instead of "risk of bias" (which is more applicable

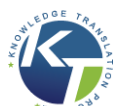



1  
2  
3 to systematic reviews of interventions) to include and acknowledge the various sources of evidence that may be used  
4 in a scoping review (e.g., quantitative and/or qualitative research, expert opinion, and policy document).  
5

6  
7 REFERENCE:

- 8  
9 1. Tricco AC, Lillie E, Zarin W, O'Brien KK, Colquhoun H, Levac D, et al. PRISMA extension for scoping reviews (PRISMA-  
10 ScR): Checklist and explanation. *Ann Intern Med.* 2018;169(7):467–73. doi: [10.7326/M18-0850](https://doi.org/10.7326/M18-0850).  
11  
12  
13  
14  
15  
16  
17  
18  
19  
20  
21  
22  
23  
24  
25  
26  
27  
28  
29  
30  
31  
32  
33  
34  
35  
36  
37  
38  
39  
40  
41  
42  
43  
44  
45  
46  
47  
48  
49  
50  
51  
52  
53  
54  
55  
56  
57

For peer review only

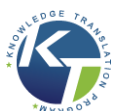

| MEDLINE search |                                                                                                                                                                                                                                                                                            |
|----------------|--------------------------------------------------------------------------------------------------------------------------------------------------------------------------------------------------------------------------------------------------------------------------------------------|
| 1.             | health?care.mp.                                                                                                                                                                                                                                                                            |
| 2.             | Hospitals/                                                                                                                                                                                                                                                                                 |
| 3.             | Community Mental Health Services/ or Mental Health Services/ or Community Health Services/ or Community Health Nursing/                                                                                                                                                                    |
| 4.             | School Health Services/                                                                                                                                                                                                                                                                    |
| 5.             | 1 or 2 or 3 or 4                                                                                                                                                                                                                                                                           |
| 6.             | Stress, Psychological/                                                                                                                                                                                                                                                                     |
| 7.             | Emotions/                                                                                                                                                                                                                                                                                  |
| 8.             | emotion*.mp.                                                                                                                                                                                                                                                                               |
| 9.             | experienc*.mp.                                                                                                                                                                                                                                                                             |
| 10.            | 6 or 7 or 8 or 9                                                                                                                                                                                                                                                                           |
| 11.            | 5 and 10                                                                                                                                                                                                                                                                                   |
| 12.            | limit 11 to "all child (0 to 18 years)"                                                                                                                                                                                                                                                    |
| 13.            | ((child* or infant* or adolescen* or teen?age* or boy* or girl* or toddler*) adj5 (view* or opinion* or feeling* or emotion* or experience* or perception* or first?hand* or their* or say?in or decision* or choice* or choos* or autonomon* or interview* or art or "art* therap*")).mp. |
| 14.            | 12 and 13                                                                                                                                                                                                                                                                                  |
| 15.            | Qualitative Research/                                                                                                                                                                                                                                                                      |
| 16.            | 14 and 15                                                                                                                                                                                                                                                                                  |

key: mp, multi-purpose search; adj5, search within adjacent 5 words.

## Braun &amp; Clarke 15-point Thematic Analysis Checklist

| Process        | No. | Criteria                                                                                                                                                        | Response                                                                                                                                                                                                                                                                                                                                                           |
|----------------|-----|-----------------------------------------------------------------------------------------------------------------------------------------------------------------|--------------------------------------------------------------------------------------------------------------------------------------------------------------------------------------------------------------------------------------------------------------------------------------------------------------------------------------------------------------------|
| Transcription  | 1   | The data have been transcribed to an appropriate level of detail, and the transcripts have been checked against the tapes for 'accuracy'                        | Both focus group transcripts transcribed to an appropriate level of detail and checked against tapes.                                                                                                                                                                                                                                                              |
| Coding         | 2   | Each data item has been given equal attention in the coding process                                                                                             | We reviewed all quotations to generate coding.                                                                                                                                                                                                                                                                                                                     |
|                | 3   | Themes have not been generated from a few vivid examples (an anecdotal approach), but instead the coding process has been thorough, inclusive and comprehensive | Themes, and the findings described herein, were developed from a complete coding process of the entire dataset. The coding process was thorough, inclusive and comprehensive, as all quotations were used to generate codes, and develop themes. Each theme was developed based on numerous codes gathered across a range of articles and participants quotations. |
|                | 4   | All relevant extracts for all each theme have been collated                                                                                                     | Yes.                                                                                                                                                                                                                                                                                                                                                               |
|                | 5   | Themes have been checked against each other and back to the original data set                                                                                   | Yes.                                                                                                                                                                                                                                                                                                                                                               |
|                | 6   | Themes are internally coherent, consistent, and distinctive                                                                                                     | Yes.                                                                                                                                                                                                                                                                                                                                                               |
| Analysis       | 7   | Data have been analysed- interpreted, made sense of- rather than just paraphrased or described                                                                  | Yes, evident from the results.                                                                                                                                                                                                                                                                                                                                     |
|                | 8   | Analysis and data match each other- the extracts illustrate the analytic claims                                                                                 | The analysis and findings from it closely match the data set.                                                                                                                                                                                                                                                                                                      |
|                | 9   | Analysis tells a convincing and well-organised story about the data and topic                                                                                   | Yes.                                                                                                                                                                                                                                                                                                                                                               |
|                | 10  | A good balance between analytical narrative and illustrative extracts is provided                                                                               | Yes. Illustrative extracts have been used within the results section.                                                                                                                                                                                                                                                                                              |
| Overall        | 11  | Enough time has been allocated to complete all phases of the analysis adequately, without rushing a phase or giving it a once-over-lightly                      | Yes.                                                                                                                                                                                                                                                                                                                                                               |
| Written report | 12  | The assumptions about, and specific approach to, thematic analysis are clearly explicated                                                                       | Yes, stated in the methods section.                                                                                                                                                                                                                                                                                                                                |
|                | 13  | There is good fit between what you claim you do, and what you show you have done- i.e. described method and reported analysis are consistent                    | Yes.                                                                                                                                                                                                                                                                                                                                                               |

|  |    |                                                                                                               |      |
|--|----|---------------------------------------------------------------------------------------------------------------|------|
|  | 14 | The language and concepts used in the report are consistent with the epistemological position of the analysis | Yes. |
|  | 15 | The researcher is positioned as <i>active</i> in the research process; themes do not just 'emerge'            | Yes. |

## REFERENCE:

1. Braun V, Clarke V. Successful qualitative research: a practical guide for beginners. London: SAGE Publications Ltd; 2013.

### **Additional Scoping Review Results: Basic numerical analysis and figures**

This supplementary information includes additional findings and graphical illustrations from basic numerical analysis.

#### *Trend in study publications over time*

On average, four studies were published each year and the rate of publication rose progressively, increasing to 11 per year in 2018 (as shown in Figure 1).

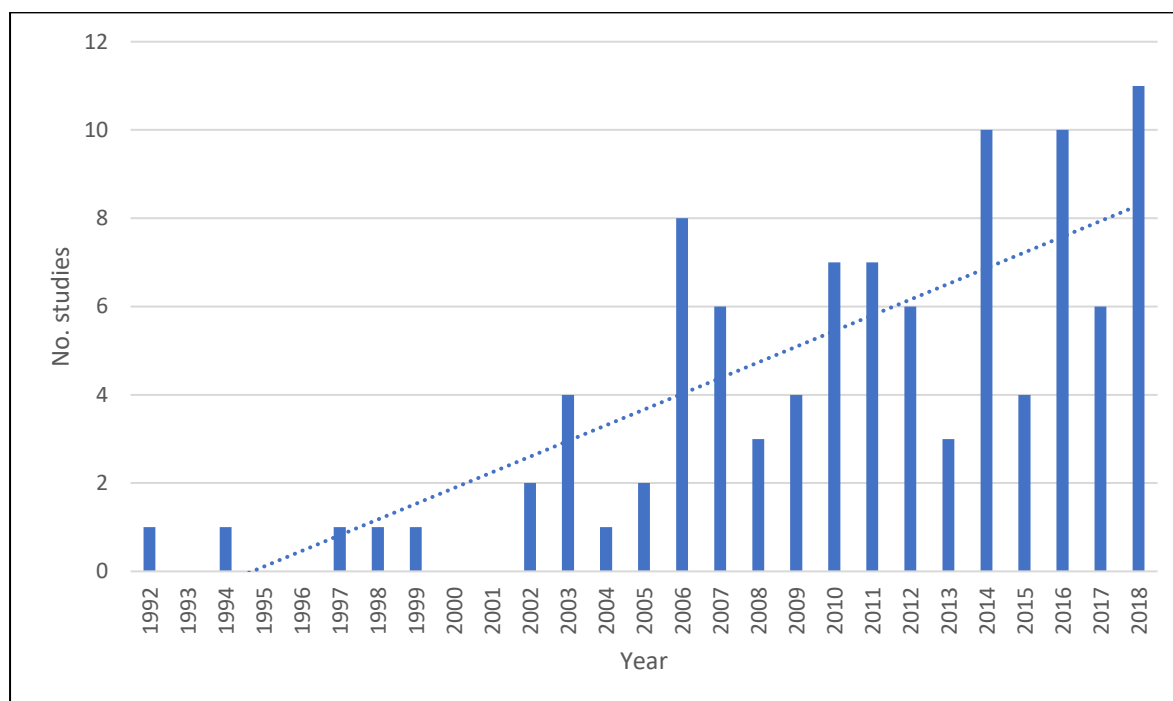

Figure 1 Years of publications

#### *Countries of origin*

Figure 2 illustrates the geographical distribution of included studies on the world map and figure 3 lists countries of origin (n=21) including the number of studies pertaining to each country. Eighty-eight studies originated in western or more developed countries of which the UK (n=26), Canada (n=15), Ireland (n=9), Sweden (n=9), and the United States (n=9) were most common.

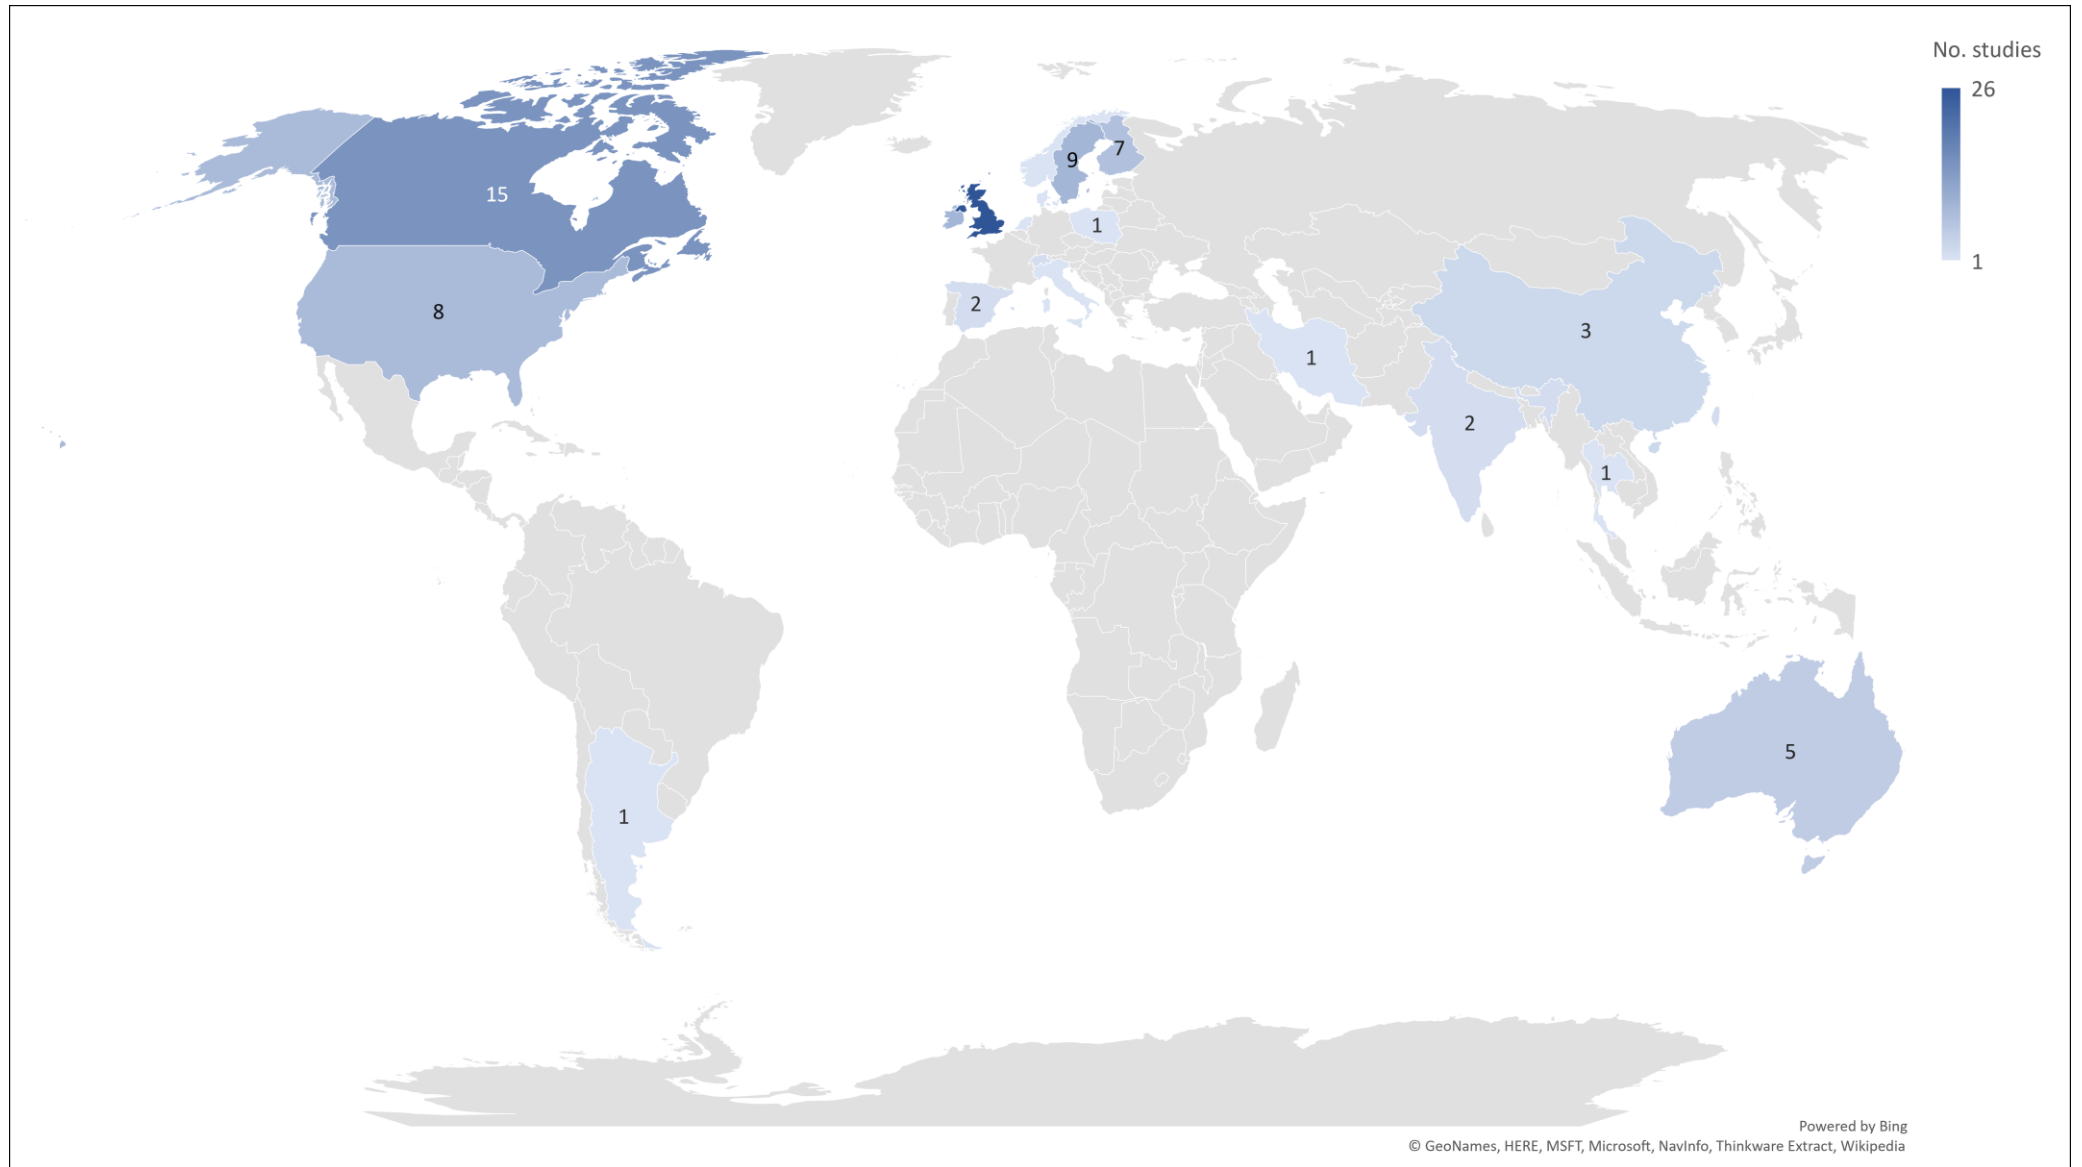

Figure 2 Map of geographical distribution of studies

1  
2  
3  
4  
5  
6  
7  
8  
9  
10  
11  
12  
13  
14  
15  
16  
17  
18  
19  
20  
21  
22  
23  
24  
25  
26  
27  
28  
29  
30  
31  
32  
33  
34  
35  
36  
37  
38  
39  
40  
41  
42  
43  
44  
45  
46

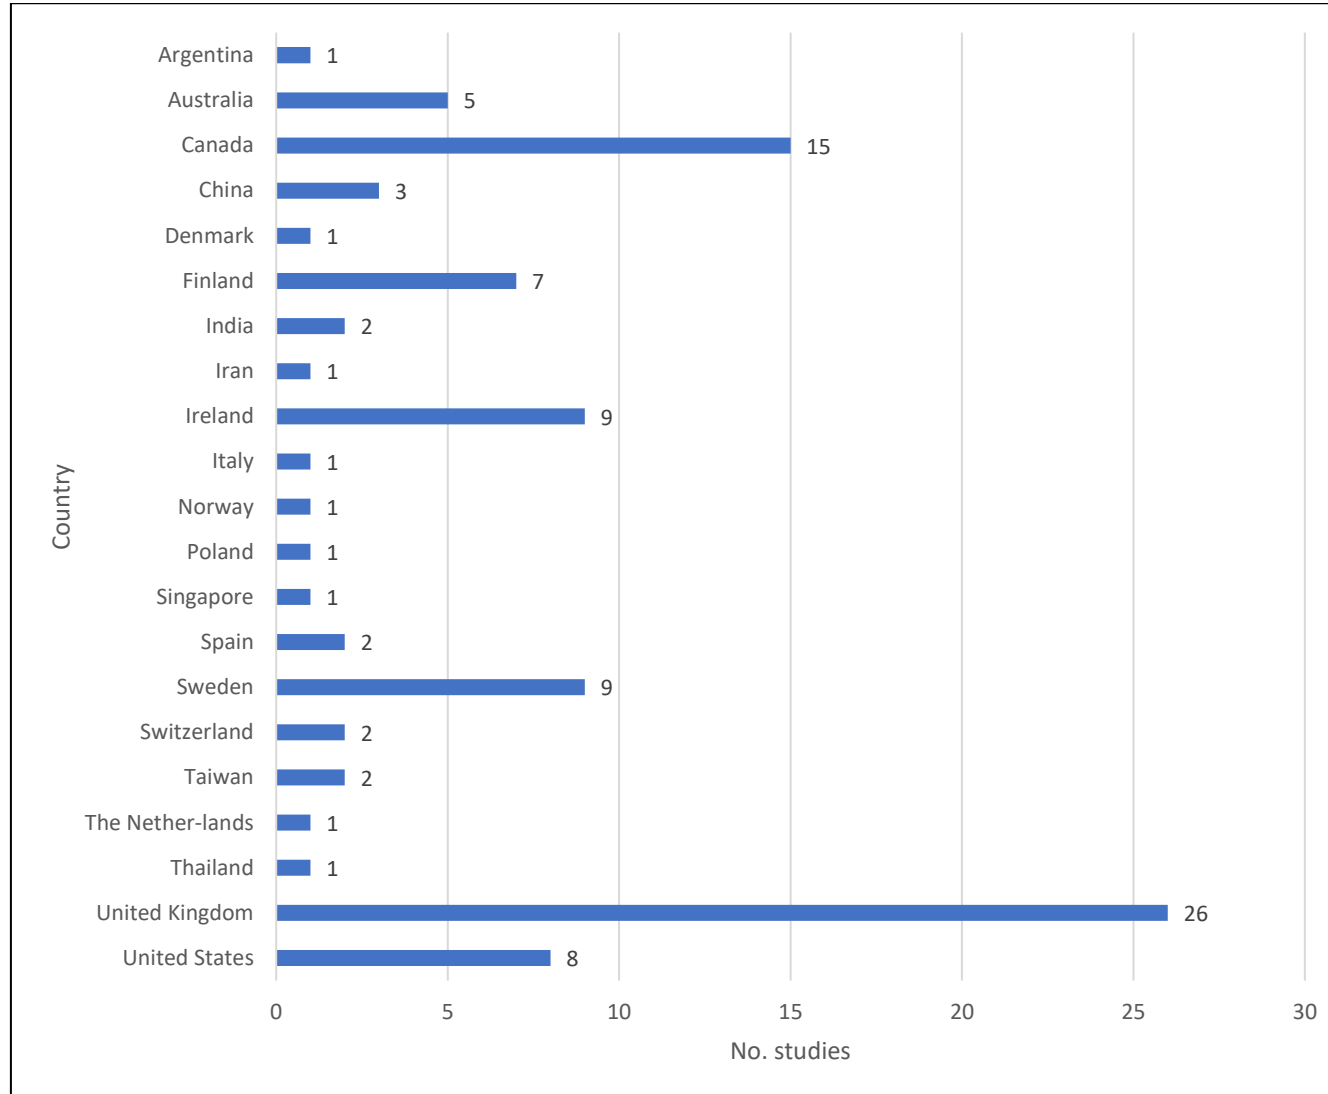

Figure 3 Number of studies per country

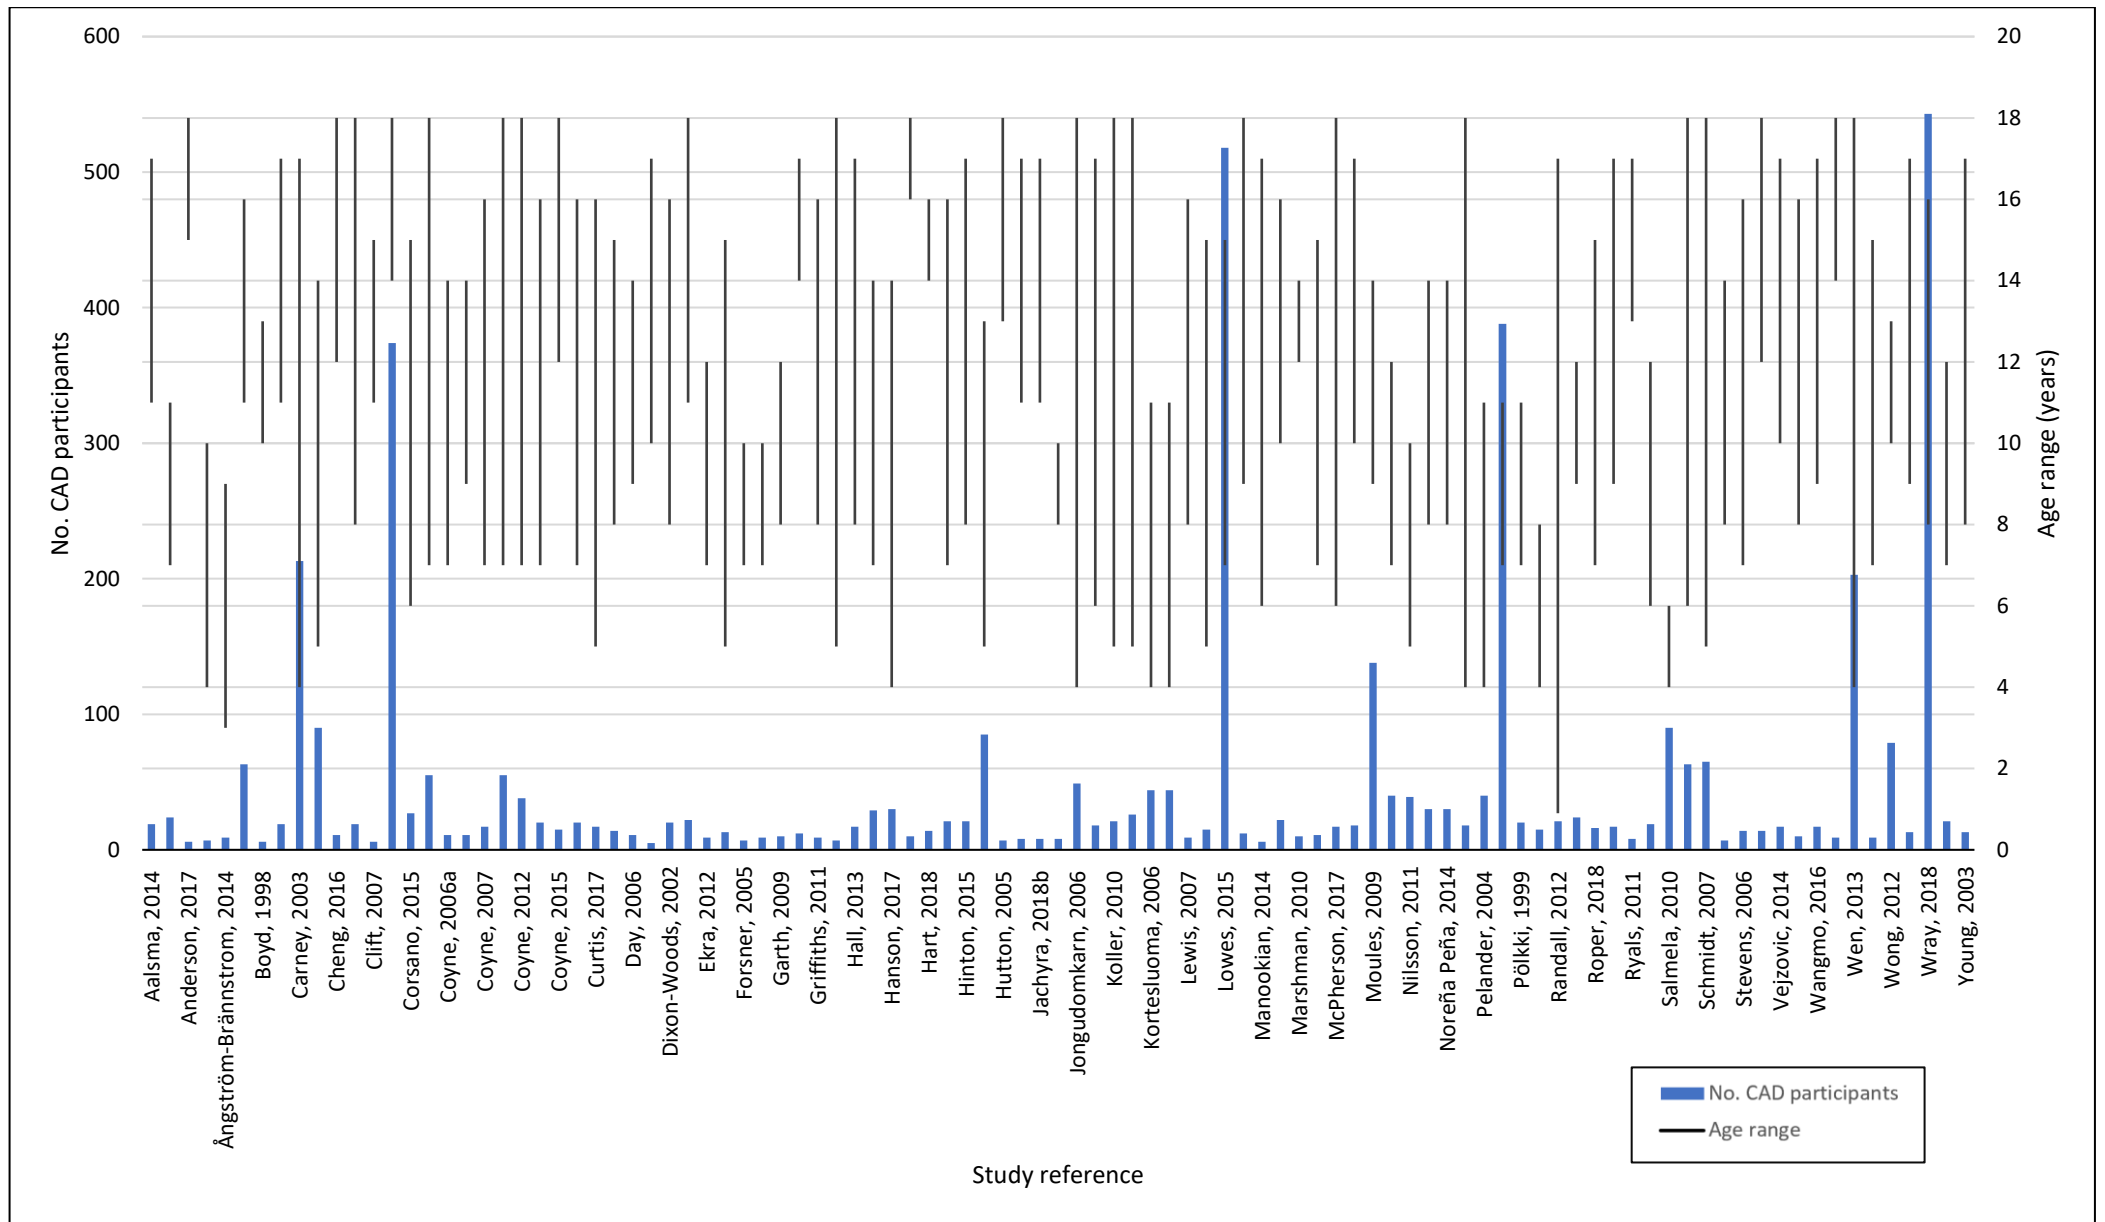

Figure 4 Number of CAD participants per study and age ranges



### *CAD participants*

The number of CAD participants per study and age ranges are illustrated in figure 4. Age ranges varied, however, most studies recruited CAD participants aged 6-17 years. Studies tended to recruit between 8 to 50 participants; seven studies recruited over 100.

### *Additional participants*

Most studies recruited CADs only (n=72). Some studies recruited other participants (n=27); who were parents, HCPs, and teachers (figure 5).

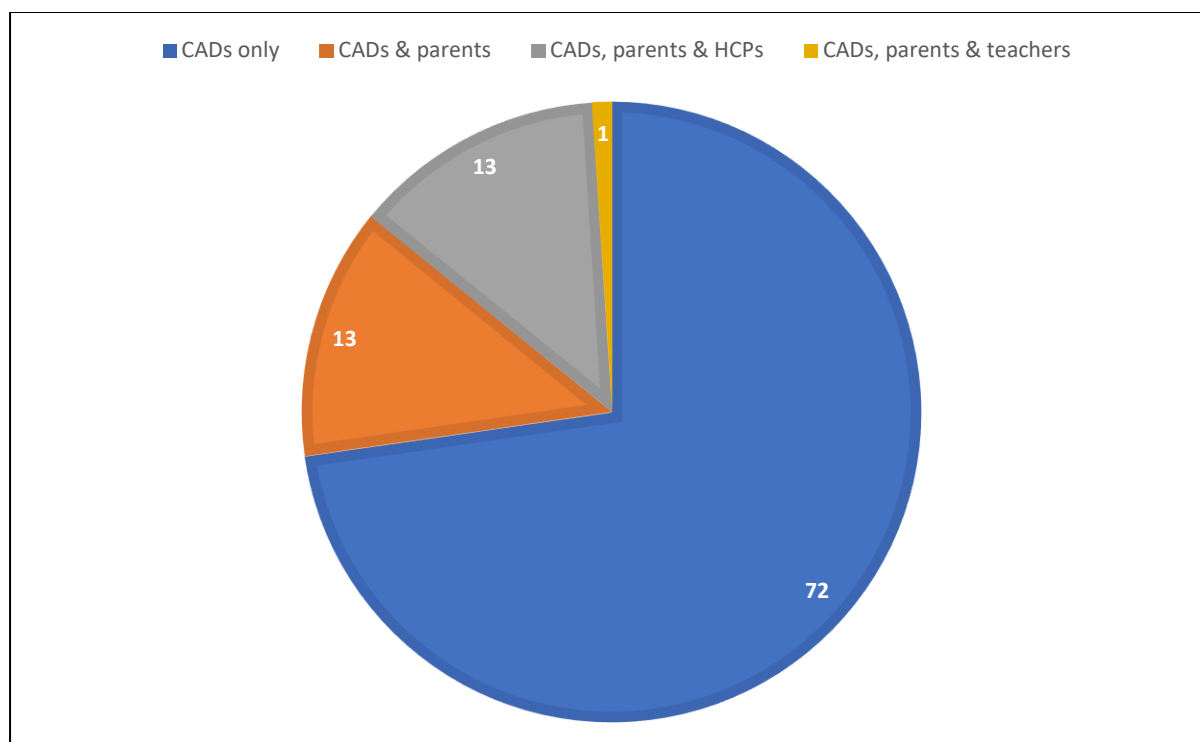

Figure 5 Study participants

### *Study methods*

Most studies used a single method; interviews were most prevalent, followed by focus groups, free-text questionnaires, and workshops (figure 6). Twenty-nine studies used 2 or 3 methods; commonly, interviews combined with observation or focus groups (figure 7).

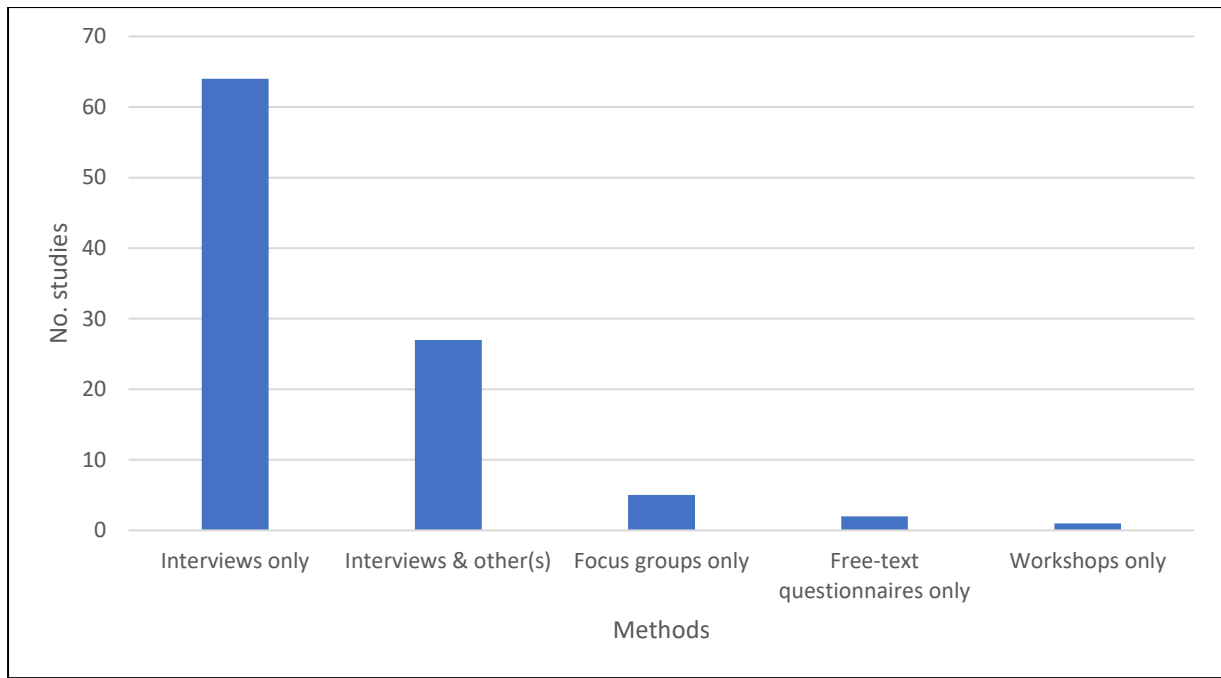

Figure 6 Methods classification

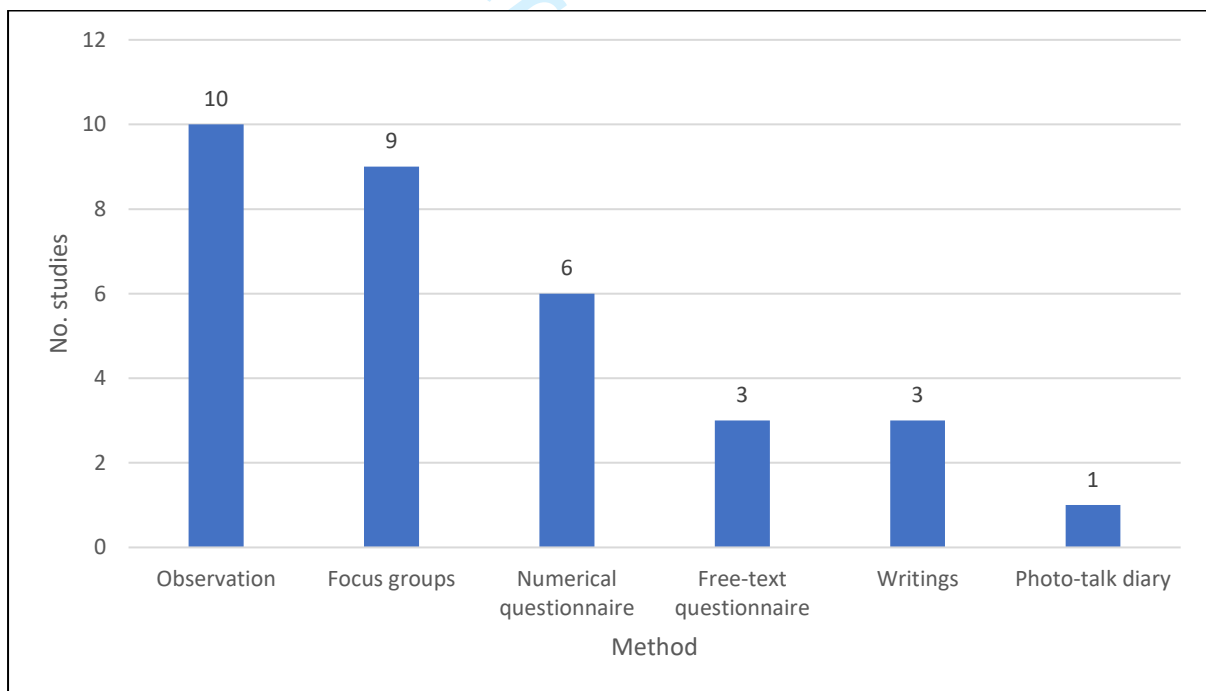

Figure 7 Methods conducted with interviews

### CADs' ages and genders from extracted quotes

Figure 1 illustrates the age distribution of quotations extracted. CADs aged 11-14 were more commonly quoted, while those aged 5-8 years were quoted less. Many quotations referenced CADs' ages (n=379, 56.7%) and genders (n=390, 58.3%); of which 52% were female.

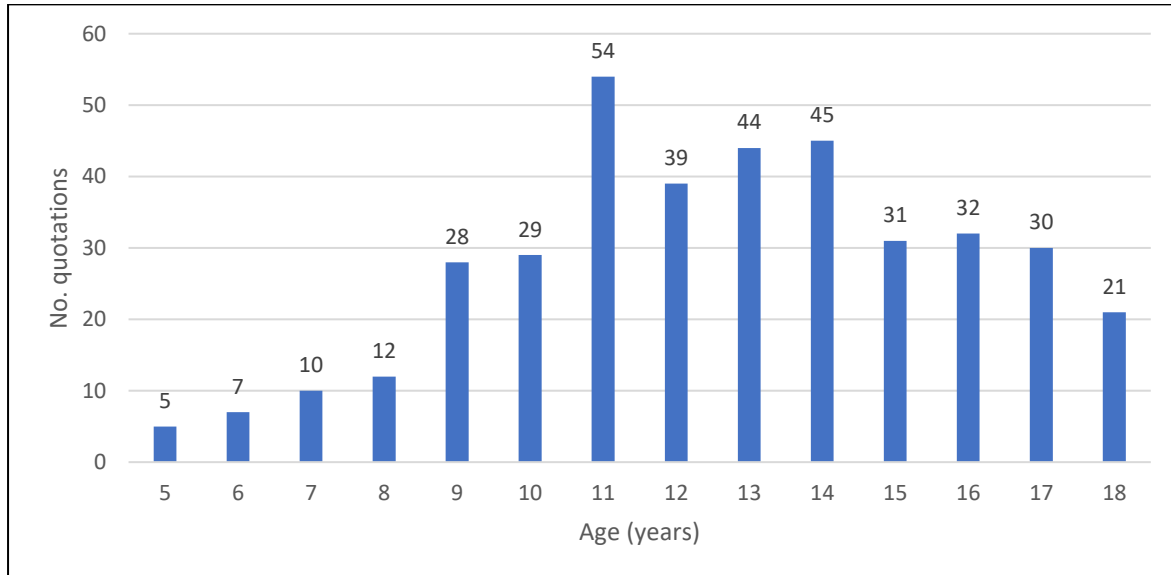

Figure 1 CAD participant ages, from extracted quotes

Quotations presented in results section

The full quotations extracted from articles are accessible using the Dryad unique identifier

<https://doi.org/10.5061/dryad.z08kprrc2>

| Quote no. | Quote as written in results section                                                           | Quote reference (first author, year, quote no.) |
|-----------|-----------------------------------------------------------------------------------------------|-------------------------------------------------|
| 1         | 'bond'                                                                                        | Ryals, 2011(49)                                 |
| 2         | 'emotional attachment'                                                                        | Brown et al., 2014(04)                          |
| 3         | 'best friend'                                                                                 | Ryals, 2011(33)                                 |
| 4         | 'relate to'                                                                                   | Ryals, 2011(32)                                 |
| 5         | 'good care'                                                                                   | Ångström-Brännström et al., 2008(05)            |
| 6         | 'strangers'                                                                                   | Coyne et al., 2015(02)                          |
| 7         | 'As time passed, [...] we created that bond.'                                                 | Ryals, 2011(29)                                 |
| 8         | 'very smart'                                                                                  | Coyne et al., 2014(02)                          |
| 9         | 'experienced'                                                                                 | Hodgins et al., 1997(02)                        |
| 10        | '[knew] what to do'                                                                           | Day et al., 2006(04)                            |
| 11        | '[took] care'                                                                                 | Noreña Peña, 2011(21)                           |
| 12        | 'everything the best they [could]'                                                            | Boyd, 1998(03)                                  |
| 13        | 'truthful'                                                                                    | Brown et al., 2014(15)                          |
| 14        | 100% with you'                                                                                | Brown et al., 2014(15)                          |
| 15        | 'just [told] you straight up.'                                                                | Brown et al., 2014(15)                          |
| 16        | 'not tell children any lies'                                                                  | Koller et al., 2010(02)                         |
| 17        | 'nothing [was] hidden'                                                                        | Coyne et al., 2016(01)                          |
| 18        | 'really nice'                                                                                 | Clift et al., 2007(06)                          |
| 19        | 'nurturing, caring and helpful people who [were] there for you'                               | Schmidt et al., 2007(01)                        |
| 20        | 'good sense of [humour]'                                                                      | Schmidt et al., 2007(15)                        |
| 21        | 'she knew what I was talking about, she knew what I was feeling, she knew how I was feeling.' | Ryals, 2011(20)                                 |
| 22        | 'took time to get to know'                                                                    | Brown et al., 2014(06)                          |
| 23        | 'real conversations, not just [HCP]-patient discussions'                                      | Schmidt et al., 2007(31)                        |
| 24        | 'down to earth'                                                                               | Ryals, 2011(45)                                 |
| 25        | 'a lot in common'                                                                             | Ryals, 2011(22)                                 |
| 26        | 'you gotta have trust.'                                                                       | Ryals, 2011(42)                                 |
| 27        | 'satisfied'                                                                                   | Wangmo et al. 2016(05)                          |
| 28        | 'happy'                                                                                       | Corsano et al. 2015(04)                         |
| 29        | 'good memories'                                                                               | Manookian et al, 2014(03)                       |
| 30        | 'open up'                                                                                     | Ryals, 2011(42)                                 |
| 31        | 'tell anything'                                                                               | Beresford et al, 2003(06)                       |
| 32        | 'cure [the] illness'                                                                          | Han et al, 2011(01)                             |
| 33        | 'whatever happens I let them [HCPs] do what they have to do to help me get better.'           | Boyd & Hunsberger, 1998(01)                     |
| 34        | 'individually [they're] all heroes.'                                                          | Anderson et al., 2017(04)                       |
| 35        | 'Because you can save people [...] I'm going to be a children's doctor.'                      | Olausson et al., 2006(01)                       |
| 36        | 'everything [was] always clear'                                                               | Schalkers et al., 2014(04)                      |
| 37        | 'together'                                                                                    | Dell'Api et al., 2007(07)                       |
| 38        | 'seriously'                                                                                   | Clift et al., 2007(05)                          |
| 39        | 'as an equal'                                                                                 | Clift et al., 2007(05)                          |

|    |                                                                                                                                                                                                                                          |                            |
|----|------------------------------------------------------------------------------------------------------------------------------------------------------------------------------------------------------------------------------------------|----------------------------|
| 40 | 'into all the conversations'                                                                                                                                                                                                             | Coyne et al., 2011(15)     |
| 41 | 'as much as they [talked to the] parents'                                                                                                                                                                                                | Edgecombe et al., 2010(03) |
| 42 | '[breaking] the words down in an easier explanation'                                                                                                                                                                                     | Coyne et al., 2006(13)     |
| 43 | 'listening'                                                                                                                                                                                                                              | Coyne et al., 2006(03)     |
| 44 | 'I tell them I don't want this and they ... understand'                                                                                                                                                                                  | Coyne et al., 2006(03)     |
| 45 | 'me because I know my own body, my parents because they know what's best for me [...] and the paediatrician because they are qualified.'                                                                                                 | Garth et al., 2009(02)     |
| 46 | 'most important, as in the end it is about [them]'                                                                                                                                                                                       | Schalkers et al., 2014(04) |
| 47 | 'brilliant'                                                                                                                                                                                                                              | Moules, 2009(01)           |
| 48 | 'interesting and informational'                                                                                                                                                                                                          | Lowes et al., 2015(02)     |
| 49 | 'learn something new'                                                                                                                                                                                                                    | Lowes et al., 2015(03)     |
| 50 | 'comfortable and confident'                                                                                                                                                                                                              | Lowes et al., 2015(02)     |
| 51 | 'make better decisions'                                                                                                                                                                                                                  | Coyne & Kirwan, 2012(23)   |
| 52 | 'fully informed'                                                                                                                                                                                                                         | Coyne & Kirwan, 2012(23)   |
| 53 | 'I'm asking the doctor more questions myself than having my Dad do it.'                                                                                                                                                                  | Coyne et al., 2006(15)     |
| 54 | 'nasty'                                                                                                                                                                                                                                  | McPherson et al., 2018(03) |
| 55 | '[seeming] that concerned'                                                                                                                                                                                                               | Coyne, 2006b(02)           |
| 56 | 'too busy'                                                                                                                                                                                                                               | Coyne et al., 2006(28)     |
| 57 | 'big words'                                                                                                                                                                                                                              | Coyne et al., 2006(16)     |
| 58 | 'they [HCPs] might ask me "is that ok" and they ask me in such a way that I kind of feel like I don't have any other option but [to] agree with them'                                                                                    | Coyne et al., 2015(01)     |
| 59 | 'behind the curtains'                                                                                                                                                                                                                    | Coyne et al., 2011(20)     |
| 60 | 'in the middle'                                                                                                                                                                                                                          | Coyne et al., 2006(18)     |
| 61 | 'you try to say something but then your parents just say shhhh! [...] They come out and say, [...] did you understand that, you say no, they say, you should have asked them, and then you say, oh you didn't let me, they say rubbish!' | Hawthorne et al., 2011(04) |
| 62 | 'rejected'                                                                                                                                                                                                                               | Coyne et al., 2006(17)     |
| 63 | 'like a piece of machinery'                                                                                                                                                                                                              | Coyne, 2006b(04)           |
| 64 | 'hard to talk'                                                                                                                                                                                                                           | Anderson et al., 2017(01)  |

# BMJ Open

## How do children and adolescents experience healthcare professionals? Scoping review and interpretive synthesis

|                                 |                                                                                                                                                                                                                                                                                                                                                                                                                                                                                                    |
|---------------------------------|----------------------------------------------------------------------------------------------------------------------------------------------------------------------------------------------------------------------------------------------------------------------------------------------------------------------------------------------------------------------------------------------------------------------------------------------------------------------------------------------------|
| Journal:                        | <i>BMJ Open</i>                                                                                                                                                                                                                                                                                                                                                                                                                                                                                    |
| Manuscript ID                   | bmjopen-2021-054368.R1                                                                                                                                                                                                                                                                                                                                                                                                                                                                             |
| Article Type:                   | Original research                                                                                                                                                                                                                                                                                                                                                                                                                                                                                  |
| Date Submitted by the Author:   | 21-Jun-2021                                                                                                                                                                                                                                                                                                                                                                                                                                                                                        |
| Complete List of Authors:       | Davison, Gail; Queen's University Belfast, Centre for Medical Education; Royal Belfast Hospital for Sick Children, Children's Emergency Department<br>Kelly, Martina; University of Calgary Faculty of Medicine, DEPARTMENT OF FAMILY MEDICINE<br>Conn, Richard; Queen's University Belfast; Royal Belfast Hospital for Sick Children, General Paediatrics<br>Thompson, Andrew; Royal Belfast Hospital for Sick Children, General Paediatrics Department<br>Dornan, T; Queen's University Belfast, |
| <b>Primary Subject Heading</b>: | Qualitative research                                                                                                                                                                                                                                                                                                                                                                                                                                                                               |
| Secondary Subject Heading:      | Paediatrics, Communication, Ethics, Patient-centred medicine                                                                                                                                                                                                                                                                                                                                                                                                                                       |
| Keywords:                       | PAEDIATRICS, Quality in health care < HEALTH SERVICES ADMINISTRATION & MANAGEMENT, QUALITATIVE RESEARCH                                                                                                                                                                                                                                                                                                                                                                                            |
|                                 |                                                                                                                                                                                                                                                                                                                                                                                                                                                                                                    |

SCHOLARONE™  
Manuscripts



I, the Submitting Author has the right to grant and does grant on behalf of all authors of the Work (as defined in the below author licence), an exclusive licence and/or a non-exclusive licence for contributions from authors who are: i) UK Crown employees; ii) where BMJ has agreed a CC-BY licence shall apply, and/or iii) in accordance with the terms applicable for US Federal Government officers or employees acting as part of their official duties; on a worldwide, perpetual, irrevocable, royalty-free basis to BMJ Publishing Group Ltd ("BMJ") its licensees and where the relevant Journal is co-owned by BMJ to the co-owners of the Journal, to publish the Work in this journal and any other BMJ products and to exploit all rights, as set out in our [licence](#).

The Submitting Author accepts and understands that any supply made under these terms is made by BMJ to the Submitting Author unless you are acting as an employee on behalf of your employer or a postgraduate student of an affiliated institution which is paying any applicable article publishing charge ("APC") for Open Access articles. Where the Submitting Author wishes to make the Work available on an Open Access basis (and intends to pay the relevant APC), the terms of reuse of such Open Access shall be governed by a Creative Commons licence – details of these licences and which [Creative Commons](#) licence will apply to this Work are set out in our licence referred to above.

Other than as permitted in any relevant BMJ Author's Self Archiving Policies, I confirm this Work has not been accepted for publication elsewhere, is not being considered for publication elsewhere and does not duplicate material already published. I confirm all authors consent to publication of this Work and authorise the granting of this licence.

1  
2  
3  
4  
5 1 **TITLE PAGE**

6  
7 2 **How do children and adolescents experience healthcare professionals? Scoping review and**  
8  
9 3 **interpretive synthesis**

10 4 Gail Davison<sup>1,2</sup>, Martina Ann Kelly<sup>3</sup>, Richard Conn<sup>1</sup>, Andrew Thompson<sup>4</sup>, Tim Dornan<sup>5</sup>

11  
12  
13  
14  
15 5 **Institution addresses:**

16  
17  
18 6 <sup>1</sup>Centre for Medical Education, Queen's University Belfast, Mulhouse Building, Mulhouse Road,  
19  
20  
21 7 Belfast, BT12 6DP, Northern Ireland, UK

22  
23  
24 8 <sup>2</sup>Children's Emergency Department, Royal Belfast Hospital for Sick Children, Belfast Health and  
25  
26 9 Social Care Trust, 180 Falls Road, Belfast, BT12 6BE, Northern Ireland, UK

27  
28  
29 10 <sup>3</sup>Department of Family Medicine, Cumming School of Medicine, University of Calgary, 2500  
30  
31 11 University Dr. NW, Calgary AB, T2N 1N4, Canada

32  
33  
34 12 <sup>4</sup>General Paediatrics Department, Royal Belfast Hospital for Sick Children, Belfast Health and  
35  
36 13 Social Care Trust, 180 Falls Road, Belfast, BT12 6BE, Northern Ireland, UK

37  
38  
39 14 <sup>5</sup>Centre for Medical Education, Queen's University Belfast, Whitla Medical Building, 97 Lisburn  
40  
41 15 Road, Belfast, BT9 7BL, Northern Ireland, UK

42  
43  
44 16 **Email addresses:**

45  
46  
47 17 Gail Davison, [gdavison05@qub.ac.uk](mailto:gdavison05@qub.ac.uk), 00447796264757 (phone), no fax available, orcid ID 0000-  
48  
49 18 0003-4875-8331 (corresponding author)

50  
51  
52 19 Martina Ann Kelly, [makelly@ucalgary.ca](mailto:makelly@ucalgary.ca), 00 1 403-210-6318 (phone), 001 403-210-9746 (fax),  
53  
54 20 orcid ID 0000-0002-8763-7092

55  
56  
57 21 Richard Conn, [r.conn@qub.ac.uk](mailto:r.conn@qub.ac.uk), 00447845081449 (phone), no fax available, orcid ID 0000-  
58  
59 22 0002-2564-254X

60  
1



1  
2  
3  
4  
5  
6  
7  
8  
9  
10  
11  
12  
13  
14  
15  
16  
17  
18  
19  
20  
21  
22  
23  
24  
25  
26  
27  
28  
29  
30  
31  
32  
33  
34  
35  
36  
37  
38  
39  
40  
41  
42  
43  
44  
45  
46  
47  
48  
49  
50  
51  
52  
53  
54  
55  
56  
57  
58  
59  
60

23 Andrew Thompson, [andrew.thompson@belfasttrust.hscni.net](mailto:andrew.thompson@belfasttrust.hscni.net), 00447879410712 (phone), no fax  
24 available, orcid ID 0000-0003-4177-4136

25 Tim Dornan, [t.dornan@qub.ac.uk](mailto:t.dornan@qub.ac.uk), 00447712528565 (phone), no fax available, orcid ID 0000-  
26 0001-7830-0183

27 **Word count: 4,143**

For peer review only

1  
2  
3  
4  
5 29 **ABSTRACT**

6  
7 30 **Objective**

8  
9  
10 31 Explore children's and adolescents' (CADs') lived experiences of healthcare professionals (HCPs).

11  
12  
13 32 **Design**

14  
15  
16 33 Scoping review methodology provided a six-step framework to, first, identify and organise  
17  
18 34 existing evidence. Interpretive phenomenology provided methodological principles for, second,  
19  
20 35 an interpretive synthesis of the life-worlds of CADs receiving healthcare, as represented by  
21  
22 36 verbatim accounts of their experiences.

23  
24  
25  
26 37 **Data Sources**

27  
28  
29 38 Five key databases (Ovid MEDLINE, Embase, Scopus, CINAHL Plus, and Web of Science), from  
30  
31 39 inception through to January 2019, reference lists, and opportunistically identified publications.

32  
33  
34 40 **Eligibility criteria**

35  
36  
37 41 Research articles containing direct first-person quotations by CADs (aged 0-18 years inclusive)  
38  
39 42 describing how they experienced HCPs.

40  
41  
42 43 **Data extraction and synthesis**

43  
44 44 Tabulation of study characteristics, contextual information, and verbatim extraction of all  
45  
46 45 'relevant' (as defined above) direct quotations. Analysis of basic scope of the evidence-base. The  
47  
48 46 research team worked reflexively and collaboratively to interpret the qualitative data and  
49  
50 47 construct a synthesis of children's experiences. To consolidate and elaborate the interpretation,  
51  
52 48 we held two focus groups with CAD inpatients in a children's hospital.

53  
54  
55  
56 49 **Results**

1  
2  
3  
4  
5 50 669 quotations from 99 studies described CADs' experiences of HCPs. Favourable experiences  
6  
7 51 were of forming trusting relationships and being involved in healthcare discussions and  
8  
9 52 decisions; less favourable experiences were of not relating to or being unable to trust HCPs  
10  
11 53 and/or being excluded from conversations about them. HCPs fostered trusting relationships by  
12  
13 54 being personable, wise, sincere, and relatable. HCPs made CADs feel involved by including them  
14  
15 55 in conversations, explaining medical information, and listening to CADs' wider needs and  
16  
17 56 preferences.  
18  
19  
20

## 21 57 **Conclusion**

22  
23  
24 58 These findings strengthen the case for making CADs partners in healthcare despite their youth.  
25  
26 59 We propose that a criterion for high-quality child-centred healthcare should be that HCPs  
27  
28 60 communicate in ways that engender trust and involvement.  
29  
30

## 31 61 **STRENGTHS AND LIMITATIONS OF THIS STUDY**

- 32  
33  
34 62 • Our findings have advanced current evidence by providing a comprehensive overview of  
35  
36 63 CADs' experiences of HCPs, while providing a blueprint for the child-centred care  
37  
38 64 conceptual model.  
39  
40  
41 65 • In addition to completing a scoping review in line with a published protocol, this article  
42  
43 66 reports an interpretive phenomenological synthesis of the evidence-base  
44  
45 67 • Restricting included articles to the English language limited the scope of our review  
46  
47  
48 68 • Limitations in the metadata provided by primary researchers prevented subgroup  
49  
50 69 analyses  
51  
52 70 • The subjectivity of interpretive synthesis is both a limitation and a strength: a limitation,  
53  
54 71 because it does not meet quantitative, experimental standards of proof; and a strength  
55  
56 72 because we used our subject position as clinicians to help fellow clinicians earn the trust  
57  
58 73 of CADs.  
59  
60

## 74 BACKGROUND

75 Children's experiences, like patients' experiences in general, are of fundamental importance in  
76 healthcare.[1–3] Research consistently shows that favourable experiences are associated with a  
77 wide range of positive health outcomes, including adherence to recommended treatments,  
78 uptake of preventive care, and utilisation of healthcare resources.[3] Exploring, understanding,  
79 and adapting to patients' experiences, particularly those concerning interpersonal  
80 communication, is the hallmark of patient-centred care (PCC), which is what patients 'strongly  
81 want'. [4,5] Accordingly, PCC has become the dominant ideology in healthcare design and  
82 delivery.[6]

83 In the case of children, however, it has proven more difficult to establish a model of PCC.  
84 Children and adolescents (CADs) are distinct from adults; they are developing physically,  
85 intellectually, and emotionally, and they occupy different positions in society and by law.[7]  
86 CADs, therefore, typically experience healthcare as part of a family unit, accompanied by  
87 parents or guardians who often act on their behalf. These factors affect the roles that CADs  
88 occupy within healthcare settings – how they interact and communicate with others – and  
89 predispose them to asymmetric relationships with adults. To address this, two specific  
90 theoretical models of care – family-centred care (FCC) and child-centred care (CCC) – have been  
91 developed for use in paediatric practice, based on the principles of PCC but incorporating  
92 modified conceptualisations of centredness.[8]

93 In FCC, the family is the central unit of care, with the aspiration of an equal partnership between  
94 healthcare professionals (HCPs) and families. FCC, which first originated in the 1950s, was an  
95 important conceptual advance because, up to this point, no framework existed to involve  
96 parents in their children's care.[7] Recent research shows, however, that even within the FCC  
97 framework, parents and professionals tend to predominate and CADs struggle to be true  
98 participants.[9] In contrast, the newer concept of CCC situates CADs at the centre of healthcare

1  
2  
3  
4  
5 99 practice, giving primacy to their voices and experiences. Rather than being guided by outsider  
6  
7 100 perspectives of children's best interests, CCC compels HCPs to consciously perceive and  
8  
9 101 understand children's conditions, experiences, and priorities, as viewed through their  
10  
11 102 eyes:[8,10,11]

13  
14 103 "[CCC] requires providers to critically consider the child's  
15  
16 104 perspective in every situation while ensuring collaboration  
17  
18 105 with the family who the [child] is part of." [8]

19  
20  
21 106 While aspects of FCC and CCC may be pertinent in different clinical contexts,[12] experts now  
22  
23 107 advocate a move towards CCC,[13] arguing that it better upholds values laid down by the UN  
24  
25 108 Convention on the Rights of the Child and governing bodies (such as the General Medical  
26  
27 109 Council),[14,15] and could improve how CADs experience healthcare.[8,13]

28  
29  
30  
31 110 Adopting the CCC approach, however, requires a major shift in thinking and practice. Research  
32  
33 111 suggests that HCPs' realities are incompatible with CADs', with HCPs focused on prioritizing  
34  
35 112 tasks, 'getting the job done', and mitigating, rather than engaging with, CADs' demands.[16]  
36  
37 113 Furthermore, HCPs' communication strategies adopted for consulting CADs are largely  
38  
39 114 underpinned and conceptualized by biomedical or psychosocial models, from the clinical  
40  
41 115 gaze,[17] with little or no input from CADs.[18,19] And while CADs' healthcare experiences  
42  
43 116 overall are generally positive, large-scale studies have identified shortcomings in how HCPs  
44  
45 117 interact and communicate,[20–22] impacting on CADs' ability to manage their conditions and  
46  
47 118 participate in decision-making.[23] HCPs, too, continue to find communicating with CADs  
48  
49 119 challenging, supporting a change in thinking and practice.[19]

50  
51  
52  
53  
54 120 To achieve the vision of CCC, then, HCPs need greater insight into the experiences of sick  
55  
56 121 children.[11] This reflects a wider drive towards co-production (providers and service users  
57  
58 122 working in equal partnership to effect change) in children's healthcare;[24,25] and also

1  
2  
3  
4  
5 123 complements the present impetus to acknowledge and examine CADs' *own* experiences,  
6  
7 124 opinions, and priorities, within research,[26,27] quality improvement,[28–30] and standard  
8  
9 125 setting.[31] To date, however, most research and surveys examining experiences in paediatric  
10  
11 126 settings have relied on parents' accounts, while CADs have participated less, if at all.[32]  
12  
13 127 Nevertheless, the few studies that have explored CADs' own experiential accounts have found  
14  
15 128 them to be informative and distinct from parents'.[23,33] At present, these accounts are widely  
16  
17 129 dispersed, yet if compiled, synthesised, and interpreted, these could provide a rich account of  
18  
19  
20 130 CADs' lived experiences of how they encounter HCPs.  
21  
22

23 131 This study aimed to explore how CADs experience HCPs within interpersonal interactions, in  
24  
25 132 order to provide practitioners, organisations, and policymakers with evidence that could  
26  
27 133 promote child-centred communication. First, we conducted a scoping literature review to  
28  
29 134 systematically gather evidence on CADs' experiences of HCPs. Second, we interpreted CADs'  
30  
31 135 extracted quotations from the perspective of phenomenology. This well-established  
32  
33 136 methodological tradition, grounded in philosophy, enables researchers to produce valid  
34  
35 137 interpretations by examining and interpreting participants' verbatim accounts of their lived  
36  
37 138 experience.[34] Finally, we organised the interpretation into a synthetic account of how CADs  
38  
39 139 experience their interactions with HCPs.  
40  
41  
42  
43

## 44 140 **METHODS**

### 45 141 **Methodological orientation**

46 142 Scoping review methodology has a pragmatic orientation in the sense that it sets out to map  
47  
48 143 existing published evidence on a topic but it is adaptable in the sense that the usefulness of its  
49  
50 144 procedures is not tied to any one specific epistemology (theory of the nature of knowledge).[35–  
51  
52 145 37] As in our previously published research,[38] this review augments scoping review  
53  
54 146 procedures with interpretive phenomenology. The latter has an ontology (theory of the nature  
55  
56 147 of being) derived from the philosophy of Husserl, according to which the lived experience of  
57  
58  
59  
60

1  
2  
3  
4  
5 148 research participants is a legitimate topic of qualitative inquiry. Interpretive phenomenology  
6  
7 149 helps researchers respond reflexively to spoken or written words and arrive at valid, subjective  
8  
9 150 interpretations. Phenomenologists typically take a reflexive stance that consciously sets aside  
10  
11 151 strong a priori preconceptions whilst allowing their own experiences (such as, in our case, having  
12  
13 152 experience of caring for sick children) to help them construct an informative interpretation.[34]  
14  
15  
16 153 The quality of a constructivist interpretation is to be judged by its trustworthiness, authenticity,  
17  
18 154 and ability to catalyse action – which, in this case, would be to improve future children’s  
19  
20 155 healthcare experiences.[39]  
21  
22

### 23 156 **Study procedures**

24  
25 157 The research followed a published protocol (accessible at <https://rdcu.be/b2FFk>),[40] which  
26  
27 158 proposed to supplement traditional scoping review procedures with an interpretive synthesis,  
28  
29 159 the distinction between which is explained in the previous paragraph. The scoping component  
30  
31 160 followed the 6-step framework outlined by Arksey & O’Malley,[35] Levac et al.,[36] and  
32  
33 161 Colquhoun et al.,[37] adhering to PRISMA-ScR reporting guidance (included in online  
34  
35 162 supplementary file 1).[41]  
36  
37  
38

### 39 163 **Step 1: Defining the research question**

40  
41  
42 164 This was: *‘What is known about children’s and adolescents’ experiences of healthcare*  
43  
44 165 *professionals, from their present perspective?’*, the final phrase emphasizing our commitment to  
45  
46 166 CADs’ contemporaneous accounts of their experiences expressed in their own words, rather  
47  
48 167 than parents’ descriptions or adults describing childhood memories.  
49  
50

### 51 168 **Step 2: Identifying relevant articles**

52  
53  
54 169 We designed a STARLITE search strategy (summarised in table 1) to identify all published articles  
55  
56 170 containing CADs’ experiences of HCPs expressed as first-person direct quotations.[42] A subject  
57  
58 171 librarian constructed a database search (included in online supplementary file 2), using the  
59  
60

172 population, context, and concept framework,[43] combining the terms ‘children’ or  
 173 ‘adolescents’, ‘healthcare’, and ‘experience’ (and synonyms), limiting it to English language  
 174 articles, ‘qualitative research’, and ‘0 to 18 years’, and then running it on Ovid MEDLINE,  
 175 Embase, Scopus, CINAHL Plus, and Web of Science from inception to 11<sup>th</sup> January 2019. We  
 176 included other articles found by searching relevant reference lists or found opportunistically.

**Table 1 STARLITE summary of search strategy[42]**

|                                  |                                                                                                                                                                 |
|----------------------------------|-----------------------------------------------------------------------------------------------------------------------------------------------------------------|
| Sampling strategy                | Comprehensive: attempting to identify all published materials                                                                                                   |
| Types of studies                 | Any published study contributing to the research question: qualitative (with or without other methodologies (i.e., mixed method)); primary or secondary sources |
| Approaches                       | Electronic database searching; manual searching of reference lists; articles found opportunistically                                                            |
| Range of years                   | From database inception until 11 <sup>th</sup> January 2019                                                                                                     |
| Limits                           | Articles published in English language; ‘qualitative research’; children aged 0-18 years (inclusive)                                                            |
| Inclusion and exclusion criteria | See table 2 and Step 3: Study selection                                                                                                                         |
| Terms used                       | See online supplementary file 2                                                                                                                                 |
| Electronic databases             | Ovid MEDLINE; Embase; Scopus; CINAHL Plus; Web of Science                                                                                                       |

### 177 **Step 3: Study selection**

178 Refinement of selection criteria

179 As is customary in scoping review, the process iterated between searching, selecting, extracting  
 180 data, and refining the research question. To enhance the rigour of this process, and in keeping  
 181 with our interpretive stance, we responded reflexively to the accumulating evidence, discussing  
 182 our interpretations, and articulating a clear rationale for each refinement. All records were  
 183 imported to Mendeley Reference Manager, duplicates removed, titles and abstracts screened  
 184 against five screening questions (Box 1), and full texts of those that screened positive reviewed  
 185 against eligibility criteria.

#### **Box 1 Screening questions**

1. Are the participants CADs ( $\leq$  18 years)?
2. Is the study examining an aspect of health, illness, or healthcare?
3. Are CADs participating as recipients of healthcare?
4. Are participants aged > 18 years excluded from the study?
5. Do children or adolescents describe experiences?



1  
2  
3  
4  
5 186 These criteria, at first provisional (table 2A), were progressively refined in response to the  
6  
7 187 heterogeneity of evidence. Table 2B shows final criteria. GD led the process of first-screening,  
8  
9 188 annotating, sorting, and collating articles. MK & TD supported her by second-screening 10% of  
10  
11 189 records, discussing results, assessing articles whose eligibility was in doubt, and responding to  
12  
13 190 the often-imprecise details given by researchers. Any ambiguities (i.e., lack of age ranges) during  
14  
15 191 screening led to full-text review and a final decision about eligibility against criteria. To optimise  
16  
17 192 validity of the selection process, GD rescreened all records and annotations after each  
18  
19 193 refinement and, finally, after definitive criteria had been set.

#### 22 194 Rationale for criteria

25 195 We included children up to and including 18 years because late adolescents are increasingly  
26  
27 196 cared for in paediatric settings.[44,45] Our age range conforms, also, with the United Nations'  
28  
29 197 influential definition of adolescence.[46] We included articles that contained verbatim  
30  
31 198 quotations irrespective of methodology. Judgement of methodological quality was not a  
32  
33 199 criterion for three reasons: it is not standard practice in scoping reviews; it is notoriously difficult  
34  
35 200 to judge qualitative research categorically;[47] and the interpretive synthesis used verbatim  
36  
37 201 quotations, whose validity does not depend on what the primary researchers did with CADs'  
38  
39 202 words. Because authors often failed to report the exact age of patient participants they quoted,  
40  
41 203 we excluded any study that included patient participants aged > 18 years (see, for example,  
42  
43 204 Tjaden et al. [48]).

| <b>Table 2 Eligibility criteria for article selection</b>                                                                                                                                                                                                                                 |                                                                                                                                                                                                                                                                                                                                                                                                                                                                                                                                                                                                                                  |
|-------------------------------------------------------------------------------------------------------------------------------------------------------------------------------------------------------------------------------------------------------------------------------------------|----------------------------------------------------------------------------------------------------------------------------------------------------------------------------------------------------------------------------------------------------------------------------------------------------------------------------------------------------------------------------------------------------------------------------------------------------------------------------------------------------------------------------------------------------------------------------------------------------------------------------------|
| <b>A. Provisional</b>                                                                                                                                                                                                                                                                     | <b>B. Definitive</b>                                                                                                                                                                                                                                                                                                                                                                                                                                                                                                                                                                                                             |
| Inclusion criteria:                                                                                                                                                                                                                                                                       |                                                                                                                                                                                                                                                                                                                                                                                                                                                                                                                                                                                                                                  |
| <ol style="list-style-type: none"> <li>1. CADs speaking about HCPs, through first-person direct quotations.</li> <li>2. HCP defined as a member of a healthcare team.</li> <li>3. CADs defined as <math>\leq 18</math> years old, regardless of health status or illness type.</li> </ol> | <ol style="list-style-type: none"> <li>1. CADs speaking about one or more HCPs, on one or more instances, from any experience, through first-person direct quotation(s), where there had been direct contact between the two parties, and where CADs were the persons receiving healthcare.</li> <li>2. An HCP defined as a member of a healthcare team with professional qualifications and training, such as a qualified doctor, nurse, therapist, psychologist, or social workers, regardless of grade.</li> <li>3. CADs defined as <math>\leq 18</math> years, regardless of health status or illness type.</li> </ol>       |
| Exclusion criteria:                                                                                                                                                                                                                                                                       |                                                                                                                                                                                                                                                                                                                                                                                                                                                                                                                                                                                                                                  |
| <ol style="list-style-type: none"> <li>1. Adults aged <math>&gt;18</math> years included in the study.</li> <li>2. Non-English language publications.</li> </ol>                                                                                                                          | <ol style="list-style-type: none"> <li>1. Adult <u>patients</u> aged <math>&gt;18</math> years included in the study with or without CADs as defined above.</li> <li>2. Non-English language publications.</li> <li>3. CADs speaking about HCP(s) not from memory of personal experience as a patient; for example, third-party description (e.g., parent).</li> <li>4. Age range of CAD participants unclear.</li> <li>5. No full-text manuscript available; only an abstract available, or unobtainable by searching online, directly emailing authors, or by university librarians requesting inter-library loans.</li> </ol> |

1  
2  
3  
4  
5 206 **Step 4: Charting the data**

6  
7 207 GD and MK piloted a spreadsheet to chart study characteristics, contextual information, and all  
8  
9 208 CADs' verbatim quotations on 10 articles; this resulted in the final dataset shown in box 2, which  
10  
11  
12 209 GD then used to extract data on the remaining articles.

13  
14  
15 **Box 2 Data extracted**

16  
17 Study characteristics:

- 18 - First author
- 19 - Year published
- 20 - Country of origin
- 21 - No. CAD participants
- 22 - Age range of CAD participants
- 23 - Male to female (or non-binary) ratio
- 24 - Other participants (e.g., parents)
- 25 - Methods
- 26 - Methodology (or analytical approach)

27  
28  
29 Contextual information:

- 30 - Study focus (the experience being explored)
- 31 - Health setting
- 32 - Health condition
- 33 - Length of healthcare encounter being explored

34  
35  
36 CADs' quotations:

- 37 - All first-person direct quotations, where CADs are talking about HCPs
- 38 - Age and gender referenced to each quotation

39  
40 210 When key information was missing or unclear, we sought clarification from primary authors. All  
41  
42 211 authors independently reviewed the extracted information for its fitness to address the aims  
43  
44 212 and purpose of the study, subsequently conferring to optimise the validity of the dataset.

45  
46  
47 213 **Step 5: Collating, summarising, and reporting the results**

48  
49  
50 214 We first analysed the basic characteristics of included studies. We then identified themes in the  
51  
52 215 verbatim quotations following Braun and Clarke's method of thematic analysis as defined by  
53  
54 216 their checklist (included in online supplementary file 3).[49,50] GD immersed herself in the data,  
55  
56 217 reviewing all quotations on Microsoft Excel, using NVivo 12 qualitative analysis software to  
57  
58 218 support generation of codes and construction of themes.[51] Other team members supported

59  
60  
12

1  
2  
3  
4  
5 219 her interpretation, by reviewing quotations first individually, and then collectively. We  
6  
7 220 systematically interrogated the data for themes that had meaning in relation to the research  
8  
9 221 question, revising candidate themes periodically (with the aid of a visual thematic map) to  
10  
11 222 ensure these were coherent, distinctive, complementary, and relevant. The ensuing thematic  
12  
13 223 structure had central concepts, which we used to organise subordinate themes and their  
14  
15 224 associated codes. Throughout this process, we constantly compared our evolving interpretation  
16  
17 225 against the original data, including a final 'quality control' check of the synthesis against all  
18  
19 226 quotations.[49,50]  
20  
21  
22

23 227 In keeping with our interpretive stance, we used our different subject positions as  
24  
25 228 paediatricians, a family doctor, and an adult internist to interpret CADs' words reflexively and  
26  
27 229 arrive at 'beyond-surface insights', so that the themes were amenable to an additional stage of  
28  
29 230 phenomenological synthesis.[34,50] As we did this, the gamut of emotional content in CADs'  
30  
31 231 words became an increasingly compelling influence on our interpretation. CADs' emotional  
32  
33 232 expressions tended to have quite distinct 'valence' (defined as the attractiveness [positive  
34  
35 233 valence] or averseness [negative valence] of the emotions described) which linked in recurring  
36  
37 234 ways to HCPs' reported behaviours.[52,53] So, for example, a HCP who related well to a child  
38  
39 235 might engender trust, while an HCP who related poorly might engender mistrust.  
40  
41  
42  
43

44 236 Whilst crude dichotomies between positive/negative emotions and behaviours do not reflect  
45  
46 237 the subtlety of interpretive research, links between these contrasting behaviours were so clearly  
47  
48 238 present that they offered a parsimonious way of presenting our results. The Results section uses  
49  
50 239 the terms 'favourable' and 'unfavourable' to specify what are, in reality, nuanced polarities. To  
51  
52 240 epitomize these important themes in ways that could encourage HCPs to emulate favourable  
53  
54 241 behaviours, we present predominantly favourable behaviours, but provide negative counter-  
55  
56 242 examples to emphasize the breadth of CADs' experiences. As in previous research,[54] we used  
57  
58 243 CADs' own words, as far as possible, to construct a narrative of findings that was as true as  
59  
60 13

1  
2  
3  
4  
5 244 possible to the phenomena experienced and narrated by children. We use the wording 'HCPs did  
6  
7 245 X' as a shorthand for the more correct wording, 'CADs experienced HCPs as doing X'.  
8  
9

#### 10 246 **Step 6: Stakeholder consultations**

11  
12 247 As recommended by Levac et al.,[36] GD, AT, and RC (with research ethics and governance  
13  
14 248 approvals) recruited CADs aged 8-16 from inpatient wards in the Royal Belfast Hospital for Sick  
15  
16 249 Children (RBHSC) to two focus groups whose aim was to consolidate and elaborate on findings.  
17  
18 250 Participants and parents chose whether parents should attend. We presented candidate themes  
19  
20 251 along with exemplar quotations and facilitated discussions, asking participants to comment on  
21  
22 252 provisional findings and provide suggestions for practice. We audio-recorded sessions and  
23  
24 253 transcribed recordings verbatim. We reviewed transcripts alongside the provisional findings to  
25  
26 254 authenticate, build upon, and summarise a final narrative of results. Participants' identities are  
27  
28 255 pseudonymised in the results section.  
29  
30  
31  
32

#### 33 256 **Patient and public involvement**

34  
35  
36 257 The essence of this research was to involve children, albeit as expressed verbatim by other  
37  
38 258 researchers. The stakeholder consultation further fulfilled the patient and public involvement  
39  
40 259 component of the research by ensuring findings disseminated were intelligible and relevant.  
41  
42  
43

## 44 260 **RESULTS**

45  
46 261 We identified 1,359 articles, excluding 1,015 by screening and 245 by reviewing full texts, and  
47  
48 262 categorised reasons for exclusion on a PRISMA flow diagram (shown in figure 1).  
49  
50

### 51 263 **Overview of included studies**

52  
53  
54 264 Table 3 presents an overview of included studies (n=99), published between 1992 and 2018. In  
55  
56 265 total, 4,448 CADs, aged 11 months to 18 years, participated. Most studies included 8 to 50  
57  
58 266 participants (n=73), aged 7 or older (n=70), and used interviews only (n=64). Studies commonly  
59  
60

1  
2  
3  
4  
5 267 included CADs with chronic and potentially debilitating or life-threatening conditions (such as  
6  
7 268 asthma and cancers), explored long-term experiences (over months to years), and focused on  
8  
9 269 hospital care. Further descriptive findings and figures are presented in online supplementary file  
10  
11 270 4.  
12  
13  
14  
15  
16  
17  
18  
19  
20  
21  
22  
23  
24  
25  
26  
27  
28  
29  
30  
31  
32  
33  
34  
35  
36  
37  
38  
39  
40  
41  
42  
43  
44  
45  
46  
47  
48  
49  
50  
51  
52  
53  
54  
55  
56  
57  
58  
59  
60

For peer review only

Table 3 Study characteristics

| Study details                                |          | CAD participants |           |         | Design             |                                          | Contextual information          |                |                           |                     | Data       |
|----------------------------------------------|----------|------------------|-----------|---------|--------------------|------------------------------------------|---------------------------------|----------------|---------------------------|---------------------|------------|
| First author, year                           | Country  | n                | Age (yrs) | M:F     | Methods            | Methodology/analytical approach          | Study focus (experience of)     | Health setting | Health condition          | Length of encounter | Quotes (n) |
| Aalsma <i>et al.</i> , 2014[55]              | US       | 19               | 11-17     | 12:7    | INT                | Qualitative                              | CAMHS                           | Non-specific   | Mental health illness     | Long-term           | 5          |
| Alex MR, 1992[56]                            | Canada   | 24               | 7-11      | 13:11   | INT, Q             | Content analysis                         | Pain                            | Hospital       | Surgical (post-op)        | Short-term          | 4          |
| Anderson <i>et al.</i> , 2017[57]            | England  | 6                | 15-18     | 3:3     | INT                | Interpretative phenomenological analysis | Lung transplantation            | Hospital       | Post-lung transplantation | Long-term           | 6          |
| Ångström-Brännström <i>et al.</i> , 2008[58] | Sweden   | 7                | 4-10      | 3:4     | INT (PT)           | Thematic analysis                        | Being comforted                 | Hospital       | Chronic                   | Short-term          | 6          |
| Ångström-Brännström <i>et al.</i> , 2014[59] | Sweden   | 9                | 3-9       | 5:4     | INT                | Content analysis                         | Comfort during cancer treatment | Hospital       | Cancer                    | Long-term           | 3          |
| Beresford <i>et al.</i> , 2003[60]           | England  | 63               | 11-16     | 27:36   | INT, FG (PT)       | Framework method                         | Communicating                   | Hospital       | Chronic                   | Long-term           | 14         |
| Boyd <i>et al.</i> , 1998[61]                | Canada   | 6                | 10-13     | 2:4     | INT (PT), WT       | Grounded theory                          | Hospital and coping strategies  | Hospital       | Surgical (chronic)        | Long-term           | 3          |
| Brown <i>et al.</i> , 2014[62]               | US       | 19               | 11-17     | 12:7    | INT                | Grounded theory                          | Therapeutic alliances           | Hospital       | Mental health illness     | ~                   | 16         |
| Carney <i>et al.</i> , 2003[63]              | Scotland | 213              | 4-17      | 115:98  | INT, FTQ           | Thematic analysis                        | Healthcare                      | Hospital       | Non-specific              | Non-specific        | 9          |
| Cheng <i>et al.</i> , 2003[64]               | Taiwan   | 90               | 5-14      | 45:45   | INT                | Content analysis                         | Pain                            | Hospital       | Non-specific              | Non-specific        | 1          |
| Cheng <i>et al.</i> , 2016[65]               | Taiwan   | 11               | 12-18     | 7:4     | INT                | Content analysis                         | Cancer recovery                 | Hospital       | Cancer                    | Long-term           | 1          |
| Christofides <i>et al.</i> , 2016[66]        | Canada   | 19               | 8-18      | 7:12    | INT                | Thematic analysis                        | Research participation          | Hospital       | Cystic fibrosis           | Long-term           | 3          |
| Clift <i>et al.</i> , 2007[67]               | Wales    | 6                | 11-15     | 3:3     | INT                | Qualitative                              | Emergency admission             | Hospital       | Non-specific              | Short-term          | 7          |
| Colver <i>et al.</i> , 2018[68]              | England  | 374              | 14-18     | 219:155 | INT, Q, OBS        | Constant comparison                      | Transition                      | Hospital       | Medical                   | Long-term           | 2          |
| Corsano <i>et al.</i> , 2015[69]             | Italy    | 27               | 6-15      | 12:15   | INT                | Qualitative                              | Emotional events                | Hospital       | Cancer/ blood disorders   | Long-term           | 4          |
| Coyne <i>et al.</i> , 2006[70]               | Ireland  | 55               | 7-18      | 30:25   | INT, FG            | Constant comparison analysis             | Participating/ decision-making  | Hospital       | Non-specific              | Non-specific        | 52         |
| Coyne, 2006a[71]                             | Ireland  | 11               | 7-14      | ~       | INT                | Grounded theory                          | Hospitalisation                 | Hospital       | Non-specific              | ~                   | 1          |
| Coyne, 2006b[72]                             | Ireland  | 11               | 9-14      | ~       | INT (PT), FTQ, OBS | Grounded theory                          | Participating                   | Hospital       | Non-specific              | ~                   | 4          |
| Coyne <i>et al.</i> , 2007[73]               | Ireland  | 17               | 7-16      | ~       | INT                | Qualitative                              | Hospitalisation                 | Hospital       | Non-specific              | Non-specific        | 8          |

| Study details                        |           | CAD participants |           |       | Design        |                                                | Contextual information               |                |                       |                     | Data       |
|--------------------------------------|-----------|------------------|-----------|-------|---------------|------------------------------------------------|--------------------------------------|----------------|-----------------------|---------------------|------------|
| First author, year                   | Country   | n                | Age (yrs) | M:F   | Methods       | Methodology/analytical approach                | Study focus (experience of)          | Health setting | Health condition      | Length of encounter | Quotes (n) |
| Coyne <i>et al.</i> , 2011[74]       | Ireland   | 55               | 7-18      | 31:24 | INT, FG       | Qualitative                                    | Communicating/ decision-making       | Hospital       | Non-specific          | Non-specific        | 20         |
| Coyne <i>et al.</i> , 2012[75]       | Ireland   | 38               | 7-18      | ~     | INT (PT)      | Content analysis                               | Hospital and HCPs                    | Hospital       | ~                     | ~                   | 24         |
| Coyne <i>et al.</i> , 2014[76]       | Ireland   | 20               | 7-16      | 11:9  | INT (PT)      | Constant comparison analysis                   | Participating/ decision-making       | Hospital       | Cancer                | Long-term           | 2          |
| Coyne <i>et al.</i> , 2015[77]       | Ireland   | 15               | 12-18     | 6:9   | INT, FG       | Thematic analysis                              | CAMHS                                | Non-specific   | Mental health illness | Long-term           | 6          |
| Coyne <i>et al.</i> , 2016[78]       | Ireland   | 20               | 7-16      | 11:9  | INT           | Grounded theory                                | Communicating                        | Hospital       | Cancer                | Long-term           | 6          |
| Curtis <i>et al.</i> , 2017[79]      | England   | 17               | 5-16      | ~     | INT (PT), OBS | Ethnographic                                   | Single/ shared rooms                 | Hospital       | ~                     | ~                   | 3          |
| Das <i>et al.</i> , 2017[80]         | India     | 14               | 8-15      | ~     | FG            | Qualitative                                    | Living with HIV                      | Non-specific   | HIV                   | Long-term           | 1          |
| Day <i>et al.</i> , 2006[81]         | England   | 11               | 9-14      | 5:6   | FG            | Thematic Analysis                              | CAMHS                                | Non-specific   | Mental health illness | Long-term           | 13         |
| Dell'Api <i>et al.</i> , 2007[82]    | Canada    | 5                | 10-17     | 2:3   | INT           | Qualitative                                    | Interacting with HCPs                | Hospital       | Non-specific          | Long-term           | 19         |
| Dixon-Woods <i>et al.</i> , 2002[83] | England   | 20               | 8-16      | 9:11  | INT           | Constant comparison analysis                   | Asthma services                      | Community      | Asthma                | Long-term           | 12         |
| Edgecombe <i>et al.</i> , 2010[84]   | England   | 22               | 11-18     | 16:6  | INT           | Thematic analysis                              | Asthma services                      | Hospital       | Asthma                | Long-term           | 5          |
| Ekra <i>et al.</i> , 2012[85]        | Norway    | 9                | 7-12      | 5:4   | INT, OBS (PT) | Hermeneutic phenomenology                      | Hospitalisation                      | Hospital       | TIDM                  | Long-term           | 2          |
| Engvall <i>et al.</i> , 2016[86]     | Sweden    | 13               | 5-15      | 6:7   | INT (PT)      | Content Analysis                               | Radiotherapy                         | Hospital       | Cancer                | Long-term           | 2          |
| Forsner <i>et al.</i> , 2005[87]     | Sweden    | 7                | 7-10      | 4:3   | INT           | Thematic analysis                              | Illness                              | Hospital       | ~                     | Short-term          | 4          |
| Forsner <i>et al.</i> , 2009[88]     | Sweden    | 9                | 7-11      | 2:7   | INT, OBS      | Hermeneutic phenomenology                      | Fear                                 | Hospital       | Non-specific          | Short-term          | 4          |
| Garth <i>et al.</i> , 2009[89]       | Australia | 10               | 8-12      | 3:7   | INT           | Grounded theory                                | Participating                        | Non-specific   | Cerebral palsy        | Long-term           | 3          |
| Gill <i>et al.</i> , 2016[90]        | England   | 12               | 14-17     | 2:10  | INT           | Thematic analysis                              | CAMHS inpatient ward                 | Non-specific   | Mental health illness | Long-term           | 2          |
| Griffiths <i>et al.</i> , 2011[91]   | Australia | 9                | 8-16      | ~     | INT           | Interpretative phenomenological analysis       | Living with cancer                   | Non-specific   | Cancer                | Long-term           | 3          |
| Haase <i>et al.</i> , 1994[92]       | US        | 7                | 5-18      | 3:4   | INT (PT)      | Colaizzi's method of phenomenological analysis | Completing cancer treatment          | Non-specific   | Cancer                | Long-term           | 6          |
| Hall <i>et al.</i> , 2013[93]        | England   | 17               | 8-17      | ~     | INT           | Thematic analysis                              | Life with repaired cleft lip/ palate | Non-specific   | Cleft lip/ palate     | Long-term           | 1          |



1  
2  
3  
4  
5  
6  
7  
8  
9  
10  
11  
12  
13  
14  
15  
16  
17  
18  
19  
20  
21  
22  
23  
24  
25  
26  
27  
28  
29  
30  
31  
32  
33  
34  
35  
36  
37  
38  
39  
40  
41  
42  
43  
44  
45  
46

| Study details                          |           | CAD participants |           |       | Design           |                                                    | Contextual information          |                |                        |                     | Data       |
|----------------------------------------|-----------|------------------|-----------|-------|------------------|----------------------------------------------------|---------------------------------|----------------|------------------------|---------------------|------------|
| First author, year                     | Country   | n                | Age (yrs) | M:F   | Methods          | Methodology/analytical approach                    | Study focus (experience of)     | Health setting | Health condition       | Length of encounter | Quotes (n) |
| Han <i>et al.</i> , 2011[94]           | China     | 29               | 7-14      | 16:13 | INT              | Content analysis                                   | Cancer                          | Hospital       | Cancer                 | Long-term           | 2          |
| Hanson <i>et al.</i> , 2017[95]        | US        | 30               | 4-14      | 16:14 | INT              | Narrative analysis                                 | Pain                            | Hospital       | Fractured arm          | Short-term          | 5          |
| Harper <i>et al.</i> , 2014[96]        | England   | 10               | 16-18     | 3:7   | INT              | Interpretative phenomenological analysis           | CAMHS                           | Non-specific   | Mental health illness  | Long-term           | 8          |
| Hart <i>et al.</i> , 2018[97]          | England   | 14               | 14-16     | ~     | INT              | Thematic analysis                                  | CAMHS                           | Non-specific   | Mental health illness  | Long-term           | 2          |
| Hawthorne <i>et al.</i> , 2011[98]     | England   | 21               | 7-16      | 12:9  | FG               | Thematic analysis                                  | Diabetes services               | Hospital       | T1DM                   | Long-term           | 8          |
| Hinton <i>et al.</i> , 2015[99]        | England   | 21               | 8-17      | 6:15  | INT (PT)         | Constant comparison analysis                       | A multiple sclerosis diagnosis  | Non-specific   | Multiple sclerosis     | Long-term           | 3          |
| Hodgins <i>et al.</i> , 1997[100]      | Canada    | 85               | 5-13      | 38:41 | INT, Q           | Mixed-method                                       | Venepuncture                    | Hospital       | Non-specific           | Short-term          | 3          |
| Hutton, 2005[101]                      | Australia | 7                | 13-18     | 3:4   | INT (PT)         | Qualitative                                        | Adolescent wards                | Hospital       | Cystic fibrosis/asthma | Long-term           | 3          |
| Jachyra <i>et al.</i> , 2018a[102]†    | Canada    | 8                | 11-17     | 4:4   | INT              | Interpretative phenomenological analysis           | Talking about weight            | Non-specific   | ASD                    | Long-term           | 6          |
| Jachyra <i>et al.</i> , 2018b[103]†    | Canada    | 8                | 11-17     | 4:4   | INT              | Interpretative phenomenological analysis           | Talking about weight            | Non-specific   | ASD                    | Long-term           | 4          |
| Jensen <i>et al.</i> , 2012[104]       | Denmark   | 8                | 8-10      | 5:3   | INT (PT)         | Thematic analysis                                  | Acute hospitalisation           | Hospital       | Medical                | Short-term          | 6          |
| Jongudomkarn <i>et al.</i> , 2006[105] | Thailand  | 49               | 4-18      | 31:18 | INT, FG, OBS, PT | Content analysis                                   | Pain                            | Non-specific   | Non-specific           | Long-term           | 1          |
| Kluthe <i>et al.</i> , 2018[106]       | Canada    | 18               | 6-17      | 11:7  | INT              | Content analysis                                   | IBD diagnosis                   | Hospital       | IBD                    | Long-term           | 1          |
| Koller <i>et al.</i> , 2010[107]       | Canada    | 21               | 5-18      | 12:9  | INT (PT)         | Grounded theory                                    | Hospitalisation during SARS     | Hospital       | Non-specific           | Long-term           | 2          |
| Koller, 2017[108]                      | Canada    | 26               | 5-18      | 11:15 | INT (PT)         | Thematic analysis                                  | Medical education/participating | Hospital       | Chronic                | Long-term           | 10         |
| Kortesluoma <i>et al.</i> , 2006[109]† | Finland   | 44               | 4-11      | ~     | INT              | Content analysis                                   | Pain                            | Hospital       | Non-specific           | Non-specific        | 1          |
| Kortesluoma <i>et al.</i> , 2008[110]† | Finland   | 44               | 4-11      | 27:17 | INT              | Content analysis                                   | Pain                            | Hospital       | Non-specific           | Non-specific        | 7          |
| Lewis <i>et al.</i> , 2007[111]        | Australia | 9                | 8-16      | 5:4   | INT              | Cognitive mapping                                  | Receiving care                  | Hospital       | ~                      | ~                   | 5          |
| Livesley <i>et al.</i> , 2013[16]      | England   | 15               | 5-15      | 3:2   | INT (PT), OBS    | Critical ethnography, constant comparison analysis | Hospitalisation                 | Hospital       | Surgical               | Long-term           | 4          |
| Lowes <i>et al.</i> , 2015[23]         | Wales     | 518              | 7-15      | ~     | FTQ              | Qualitative descriptive analysis                   | Life with T1DM and services     | Hospital       | T1DM                   | Long-term           | 8          |

| Study details                          |           | CAD participants |           |           | Design              |                                                | Contextual information            |                |                          |                     | Data       |
|----------------------------------------|-----------|------------------|-----------|-----------|---------------------|------------------------------------------------|-----------------------------------|----------------|--------------------------|---------------------|------------|
| First author, year                     | Country   | n                | Age (yrs) | M:F       | Methods             | Methodology/analytical approach                | Study focus (experience of)       | Health setting | Health condition         | Length of encounter | Quotes (n) |
| Macartney <i>et al.</i> , 2014[112]    | Canada    | 12               | 9-18      | 6:6       | INT                 | Content analysis                               | Life after a brain tumour         | Non-specific   | Brain tumour             | Long-term           | 1          |
| Manookian <i>et al.</i> , 2014[113]    | Iran      | 6                | 6-17      | 3:3       | INT                 | Interpretative phenomenological analysis       | Stem cell transplantation         | Hospital       | Cancer & blood disorders | Long-term           | 4          |
| Marcinowicz <i>et al.</i> , 2016[114]  | Poland    | 22               | 10-16     | 8:14      | INT                 | Content analysis                               | Nurse relationships and wards     | Hospital       | ~                        | ~                   | 7          |
| Marshman <i>et al.</i> , 2010[115]     | England   | 10               | 12-14     | 5:5       | INT, Q              | Framework analysis                             | Malocclusion treatment            | Non-specific   | Malocclusion             | Long-term           | 1          |
| McNelis <i>et al.</i> , 2007[116]      | India     | 11               | 7-15      | 6:5       | FG                  | Thematic analysis                              | Living with epilepsy              | Non-specific   | Epilepsy                 | Long-term           | 2          |
| McPherson <i>et al.</i> , 2017[117]    | Canada    | 17               | 6-18      | 8:9       | INT                 | Phenomenology, thematic analysis               | Talking about weight              | Hospital       | Spina Bifida             | Long-term           | 3          |
| McPherson <i>et al.</i> , 2018[118]    | Canada    | 18               | 10-17     | 9:9       | INT, FG             | Thematic analysis                              | Talking about weight              | Hospital       | Non-specific             | Long-term           | 3          |
| Moules, 2009[119]                      | England   | 138              | 9-14      | 82:56     | INT (PT)            | Framework analysis                             | Hospital care                     | Hospital       | ~                        | ~                   | 3          |
| Nguyen <i>et al.</i> , 2010[120]       | Sweden    | 40               | 7-12      | ~         | INT, Q, vital signs | Content analysis                               | Music therapy for lumbar puncture | Hospital       | Cancer                   | Short-term          | 1          |
| Nilsson <i>et al.</i> , 2011[121]      | Sweden    | 39               | 5-10      | 32:7      | INT                 | Content analysis                               | Pain                              | Hospital       | Skin trauma              | Short-term          | 4          |
| Noreña Peña <i>et al.</i> , 2011[122]† | Spain     | 30               | 8-14      | 13:17     | INT, OBS            | Critical incident technique                    | Communicating with nurses         | Hospital       | Surgical                 | ~                   | 24         |
| Noreña Peña <i>et al.</i> , 2014[123]† | Spain     | 30               | 8-14      | 13:17     | INT, OBS            | Critical incident technique                    | Communicating with nurses         | Hospital       | Surgical                 | ~                   | 22         |
| Olausson <i>et al.</i> , 2006[124]     | Sweden    | 18               | 4-18      | 8:10      | INT                 | Hermeneutic phenomenology                      | Life after transplantation        | Non-specific   | Post- transplant         | Long-term           | 6          |
| Pelander <i>et al.</i> , 2004[125]     | Finland   | 40               | 4-11      | 28:12     | INT                 | Content analysis                               | Nursing care                      | Hospital       | Chronic (T1DM & other)   | Long-term           | 3          |
| Pelander <i>et al.</i> , 2010[126]     | Finland   | 388              | 7-11      | 198:188 * | FTQ                 | Content analysis                               | Hospitalisation                   | Hospital       | Non-specific             | Non-specific        | 2          |
| Pölkki <i>et al.</i> , 1999[127]       | Finland   | 20               | 7-11      | ~         | INT, WT             | Content analysis                               | Pain                              | Hospital       | Non-specific             | ~                   | 1          |
| Pope <i>et al.</i> , 2018[128]         | Australia | 15               | 4-8       | 11:4      | INT (PT)            | Thematic analysis                              | Pain and nurses' roles            | Hospital       | Trauma                   | Short-term          | 1          |
| Randall, 2012[129]                     | England   | 21               | 0.9-17    | 8:12 *    | INT, FG (PT), PTD   | Colaizzi's method of phenomenological analysis | Community children's nursing      | Community      | Non-specific             | Long-term           | 4          |
| Rankin <i>et al.</i> , 2018[130]       | Scotland  | 24               | 9-12      | 13:11     | INT (PT)            | Thematic analysis                              | Managing T1DM                     | Non-specific   | T1DM                     | Long-term           | 1          |
| Roper <i>et al.</i> , 2018[27]         | England   | 16               | 7-15      | 9:7       | INT                 | Qualitative                                    | Research participation/ consent   | Hospital       | Asthma or anaphylaxis    | Short-term          | 7          |

| Study details                        |                 | CAD participants |           |        | Design       |                                                | Contextual information           |                    |                       |                     | Data       |
|--------------------------------------|-----------------|------------------|-----------|--------|--------------|------------------------------------------------|----------------------------------|--------------------|-----------------------|---------------------|------------|
| First author, year                   | Country         | n                | Age (yrs) | M:F    | Methods      | Methodology/analytical approach                | Study focus (experience of)      | Health setting     | Health condition      | Length of encounter | Quotes (n) |
| Ruhe <i>et al.</i> , 2016[131]       | Switzerland     | 17               | 9-17      | 11:6   | INT          | Thematic analysis                              | Participating                    | Hospital           | Cancer                | Long-term           | 1          |
| Ryals, 2011[132]                     | US              | 8                | 13-17     | 6:2    | INT          | Phenomenology                                  | Therapeutic relationships        | Non-specific       | Mental health illness | Long-term           | 59         |
| Saarikoski <i>et al.</i> , 2018[133] | Finland         | 19               | 6-12      | 7:12   | FG           | Content analysis                               | Therapeutic intervention         | Community (school) | Enuresis              | Long-term           | 1          |
| Salmela <i>et al.</i> , 2010[134]    | Finland         | 90               | 4-6       | ~      | INT          | Colaizzi's method of phenomenological analysis | Hospital related fears           | Hospital           | ~                     | ~                   | 4          |
| Schalkers <i>et al.</i> , 2014[135]  | The Netherlands | 63               | 6-18      | 31:32  | INT (PT), WT | Action research                                | Hospital care                    | Hospital           | Non-specific          | ~                   | 8          |
| Schmidt <i>et al.</i> , 2007[136]    | US              | 65               | 5-18      | 34:31  | INT, FTQ     | Thematic analysis                              | Nurses in hospital               | Hospital           | Non-specific          | Non-specific        | 45         |
| Spalding <i>et al.</i> , 2016[137]   | England         | 7                | 8-14      | 2:5    | WS (PT)      | Action research, thematic analysis             | Good doctors                     | Hospice            | Palliative            | Long-term           | 3          |
| Stevens <i>et al.</i> , 2006[138]    | Canada          | 14               | 7-16      | 9:5    | INT          | Content analysis                               | Home chemotherapy                | Community (home)   | Cancer                | Long-term           | 1          |
| Taylor <i>et al.</i> , 2010[139]     | England         | 14               | 12-18     | ~      | INT          | Framework analysis                             | Life after transplantation       | Non-specific       | Liver transplant      | Long-term           | 6          |
| Vejzovic <i>et al.</i> , 2014[140]   | Sweden          | 17               | 10-17     | 5:12   | INT          | Content analysis                               | Preparing for colonoscopy        | Hospital           | Suspected IBD         | Short-term          | 4          |
| Vindrola-Padros, 2012[141]           | Argentina       | 10               | 8-16      | 5:5    | INT (PT)     | Narrative analysis                             | Living with cancer               | Non-specific       | Cancer                | Long-term           | 4          |
| Wangmo <i>et al.</i> , 2016[142]     | Switzerland     | 17               | 9-17      | 11:6   | INT          | Qualitative                                    | Cancer services and treatment    | Hospital           | Cancer                | Long-term           | 5          |
| Watson <i>et al.</i> , 2009[143]     | US              | 9                | 14-18     | 7:1:1# | INT          | Grounded theory                                | Assessing CAMHS & mental illness | Non-specific       | Mental health illness | Long-term           | 1          |
| Wen <i>et al.</i> , 2013[144]§       | Singapore       | 203              | 4-18      | ~      | INT, OBS     | Thematic analysis                              | Pain                             | Non-specific       | Surgical (post-op)    | Non-specific        | 15         |
| Wise, 2002[145]                      | US              | 9                | 7-15      | ~      | INT (PT)     | Hermeneutic phenomenology                      | Transplantation                  | Non-specific       | Liver transplant      | Long-term           | 7          |
| Wong <i>et al.</i> , 2012[146]       | China           | 79               | 10-13     | 54:25  | FG           | Qualitative                                    | Weight-loss program              | Community (school) | Obesity               | Long-term           | 1          |
| Woodgate, 2008[147]                  | Canada          | 13               | 9-17      | 7:6    | INT          | Constant comparison analysis                   | Cancer symptoms                  | Non-specific       | Cancer                | Long-term           | 1          |
| Wray <i>et al.</i> , 2018[148]       | England         | 543              | 8-16      | ~      | INT, FG, Q   | Framework Analysis                             | Healthcare                       | Hospital           | ~                     | ~                   | 5          |
| Xie <i>et al.</i> , 2016[149]        | China           | 21               | 7-12      | 12:9   | INT          | Content Analysis                               | Lumbar puncture                  | Hospital           | ALL                   | Short-term          | 15         |
| Young <i>et al.</i> , 2003[150]      | England         | 13               | 8-17      | 8:5    | INT          | Constant comparison analysis                   | Communicating                    | Hospital           | Cancer                | Long-term           | 7          |

1  
2  
3  
4  
5  
6  
7  
8  
9  
10  
11  
12  
13  
14  
15  
16  
17  
18  
19  
20  
21  
22  
23  
24  
25  
26  
27  
28  
29  
30  
31  
32  
33  
34  
35  
36  
37  
38  
39  
40  
41  
42  
43  
44  
45  
46

Note:

Non-specific, not focusing on a certain type or area; ALL, acute lymphoblastic leukaemia; ASD, autism spectrum disorder; CAMHS, child and adolescent mental health service; HIV, human immunodeficiency virus; IDB, inflammatory bowel disease; SARS, severe acute respiratory syndrome; T1DM, type 1 diabetes mellitus. FG, focus groups; FTQ, free-text questionnaires; INT, interviews; OBS, observations; PT, participatory techniques employed; PTD, photo talk diaries; Q, quantitative questionnaires; WS, workshops; WT, writings; ~, unable to ascertain; \*, numerical inconsistency detected in source article; †, same study with different quotations presented; §, qualitative systematic review; #, non-binary gender.

1  
2  
3  
4  
5 **278 Children's and adolescents' experiences**  
6

7  
8 279 Six-hundred and sixty-nine quotations referred to CADs' experiences of HCPs, most of whom

9  
10 280 were doctors or nurses. CADs also spoke about their experiences with counsellors,

11  
12 281 psychologists, social workers, and dentists. CADs' ages (available for 397 quotations), ranged

13  
14 282 from 5-18 years (average 13); male and female participants were equally represented (see

15  
16 283 supplementary file 5). All quotations extracted are available at doi:10.5061/dryad.z08kprrc2;

17  
18 284 quotations presented below are cited in online supplementary file 6.

19  
20 285 CADs' favourable experiences were of HCPs forming trusting relationships and involving them in

21  
22 286 healthcare discussions and decisions and their unfavourable experiences were generally towards

23  
24 287 the opposite pole.

25  
26 288 Forming trusting relationships

27  
28 289 *Their nature*

29  
30 290 Being in a trusting relationship was feeling a 'bond', having an 'emotional attachment', or having

31  
32 291 a 'best friend'. CADs and HCPs knew each other, could 'relate to' each other, and really

33  
34 292 understood each other. There was openness, transparency, and there was trust. CADs trusted in

35  
36 293 HCPs to provide 'good care', knowing they would do everything necessary, and do it right.

37  
38 294 *Their origins*

39  
40 295 At first, HCPs were 'strangers'; CADs did not know the HCPs, who they were, and how they were.

41  
42 296 HCPs, likewise, did not know CADs, their histories, or their personalities. Repeated contact and

43  
44 297 dialogue built and reinforced relationships: 'As time passed, [...] we created that bond.'

45  
46 298 HCPs engendered trusting relationships by demonstrating positive attributes, including being

47  
48 299 able to empathise. CADs trusted in HCPs who were 'very smart', 'experienced', '[knew] what to

1  
2  
3  
4  
5 300 do', '[took] care', and did 'everything the best they [could]'. They trusted HCPs who were  
6  
7 301 'truthful', '100% with you', and 'just [told] you straight up.' Such HCPs did 'not tell children any  
8  
9 302 lies'; 'nothing [was] hidden'. CADs built trusting relationships with HCPs who were 'really nice',  
10  
11 303 'nurturing, caring, and helpful people who [were] there for you', and had a 'good sense of  
12  
13  
14 304 [humour]'.

15  
16  
17 305 HCPs related to CADs by understanding them: 'she knew what I was talking about, she knew  
18  
19 306 what I was feeling, she knew how I was feeling.' HCPs 'took time to get to know' CADs and had  
20  
21 307 'real conversations, not just [HCP]-patient discussions', in which they shared experiences and  
22  
23 308 got to know each other personally. CADs could better relate to HCPs who were 'down to earth'  
24  
25 309 and had 'a lot in common'.

### 26 27 28 29 310 *Their effects*

30  
31  
32 311 Trust was vital: 'you gotta have trust.' Trusting relationships improved CADs' healthcare  
33  
34 312 experiences by promoting positive emotions. CADs felt 'satisfied' and 'happy'. They enjoyed  
35  
36 313 their time with HCPs and had 'good memories'. CADs were more able to 'open up' or 'tell  
37  
38 314 anything' to HCPs whom they trusted. Trusting relationships gave CADs hope that HCPs could  
39  
40 315 'cure [the] illness' or help lessen the pain. CADs who trusted HCPs submitted themselves more  
41  
42 316 willingly to recommended treatments: 'whatever happens I let them [HCPs] do what they have  
43  
44 317 to do to help me get better.' And they consciously chose to remain with or seek out HCPs they  
45  
46 318 trusted. CADs admired trustworthy HCPs: 'individually [they're] all heroes.' And they aspired to  
47  
48 319 be like them: 'Because you can save people [...] I'm going to be a children's doctor.'

### 49 50 51 52 53 320 Being involved in healthcare discussions and decisions

### 54 55 56 321 *The nature of involvement*

1  
2  
3  
4  
5 322 CADs who were fully involved in healthcare discussions felt they knew everything; 'everything  
6  
7 323 [was] always clear' to them. They had a seat at the table to discuss issues that affected them and  
8  
9 324 felt acknowledged as key stakeholders. CADs worked 'together' with HCPs and parents; they felt  
10  
11  
12 325 as though they were respected, taken 'seriously', and treated 'as an equal'.  
13  
14

15 326 *Its origins*

16  
17 327 HCPs involved CADs by including them in conversations, sharing information, providing  
18  
19 328 opportunities to ask questions, taking time to answer, and listening to their wider needs and  
20  
21 329 preferences. HCPs who promoted involvement used simple words, communicated in a timely  
22  
23 330 way, gave accurate information at the right pace, and explained things so that CADs understood.  
24  
25 331 These HCPs brought CADs 'into all the conversations' by talking to CADs 'as much as they [talked  
26  
27 332 to the] parents'. Parents facilitated CADs' involvement in the presence of HCPs or afterwards by  
28  
29 333 '[breaking] the words down in an easier explanation'. HCPs promoted participation by 'listening'  
30  
31 334 to and respecting CADs' requests: 'I tell them I don't want this and they ... understand'. For more  
32  
33 335 complex decisions, CADs took a joint approach: 'me because I know my own body, my parents  
34  
35 336 because they know what's best for me [...] and the paediatrician because they are qualified.'  
36  
37  
38  
39  
40

41 337 *Its effects*

42  
43 338 CADs viewed involvement as 'most important, as in the end it is about [them]'. CADs enjoyed  
44  
45 339 being involved; it was 'brilliant', and they looked forward to their next visit. CADs were more  
46  
47 340 satisfied with healthcare; they found it 'interesting and informational'. Getting to 'learn  
48  
49 341 something new' made them feel 'comfortable and confident'. CADs could 'make better  
50  
51 342 decisions' because they were 'fully informed'. This promoted self-advocacy and self-efficacy:  
52  
53 343 'I'm asking the doctor more questions myself than having my Dad do it.'  
54  
55  
56  
57

58 344 Not forming trusting relationships or being involved  
59  
60

1  
2  
3  
4  
5 345 CADs described unfavourable experiences, which broadly *mirrored* favourable ones. For  
6  
7 346 instance, trust was undermined by HCPs getting things wrong, being 'nasty', and not '[seeming]  
8  
9 347 that concerned'. HCPs being unfamiliar to CADs because they were 'too busy' or because HCPs  
10  
11 348 or CADs moved to other services prevented trusting relationships forming. HCPs excluded CADs  
12  
13 349 by using 'big words', speaking too fast, or telling them nothing, so that CADs could not  
14  
15 350 understand. HCPs neglecting to ask CADs or asking in a tokenistic way prevented them 'having a  
16  
17 351 say': 'they [HCPs] might ask me "is that ok" [...] in such a way that I kind of feel like I don't have  
18  
19 352 any other option but [to] agree with them'. HCPs and parents side-lined CADs by talking behind  
20  
21 353 the curtains so CADs could not hear or sticking them 'in the middle' of a conversation where  
22  
23 354 they could not interrupt. Some parents told CADs to keep quiet or dominated conversations:  
24  
25 355 'you try to say something but then your parents just say shhhhh! [...] They come out and say, [...]  
26  
27 356 did you understand that, you say no, they say, you should have asked them, and then you say,  
28  
29 357 oh you didn't let me, they say rubbish!'  
30  
31  
32  
33  
34  
35 358 Not trusting people or understanding what was happening made CADs fearful. HCPs who made  
36  
37 359 CADs feel 'rejected' and objectified, 'like a piece of machinery', enraged them. CADs found it  
38  
39 360 'hard to talk', disengaged in conversations, and left the talking to their parents. Not trusting in  
40  
41 361 HCPs or being uninvolved meant some CADs hated hospital or clinic, they objected to attending,  
42  
43 362 and sought information or guidance from other sources.  
44  
45  
46

### 363 Stakeholder consultations

47  
48  
49 364 Two CAD inpatients participated in each of two focus groups (3 females and 1 male, aged 11-15  
50  
51 365 years) lasting 67 and 93 minutes respectively. Their medical conditions included type 1 diabetes,  
52  
53 366 coeliac disease, spina bifida, and spinal/brain surgery. No parents attended. Three authors (GD,  
54  
55 367 AT, & RC) attended both consultations and a hospital play specialist attended the first  
56  
57 368 consultation. Participants identified with the provisional findings and elaborated on them (table  
58  
59  
60



1  
2  
3  
4  
5  
6  
7  
8  
9  
10  
11  
12  
13  
14  
15  
16  
17  
18  
19  
20  
21  
22  
23  
24  
25  
26  
27  
28  
29  
30  
31  
32  
33  
34  
35  
36  
37  
38  
39  
40  
41  
42  
43  
44  
45  
46  
47  
48  
49  
50  
51  
52  
53  
54  
55  
56  
57  
58  
59  
60

369 4). All wanted some degree of involvement in their own care though the amount of information  
370 and level of participation they wanted depended on their age, what was being discussed, and  
371 individual preferences. Box 3 offers take-home messages for HCPs.

For peer review only

372 **Table 4 Stakeholder findings: Focus group participants' experiences mapped to overarching themes**

| Overarching themes       | Forming trusting relationships                                                                                                                                                                                                                                                                                                                                                                                                                                                                                                                                                                                                                                                                                                                                                                                                                                                                                                                                                                                                                                                                                                                                                                  | Being involved in healthcare discussions and decisions                                                                                                                                                                                                                                                                                                                                                                                                                                                                                                                                                                                                                                                                                                                                                                                                                                                                                                                                                                                                                                                                                                                                                                                                                                                                                                                                                                                                           |
|--------------------------|-------------------------------------------------------------------------------------------------------------------------------------------------------------------------------------------------------------------------------------------------------------------------------------------------------------------------------------------------------------------------------------------------------------------------------------------------------------------------------------------------------------------------------------------------------------------------------------------------------------------------------------------------------------------------------------------------------------------------------------------------------------------------------------------------------------------------------------------------------------------------------------------------------------------------------------------------------------------------------------------------------------------------------------------------------------------------------------------------------------------------------------------------------------------------------------------------|------------------------------------------------------------------------------------------------------------------------------------------------------------------------------------------------------------------------------------------------------------------------------------------------------------------------------------------------------------------------------------------------------------------------------------------------------------------------------------------------------------------------------------------------------------------------------------------------------------------------------------------------------------------------------------------------------------------------------------------------------------------------------------------------------------------------------------------------------------------------------------------------------------------------------------------------------------------------------------------------------------------------------------------------------------------------------------------------------------------------------------------------------------------------------------------------------------------------------------------------------------------------------------------------------------------------------------------------------------------------------------------------------------------------------------------------------------------|
| Favourable experiences   | <p>Rachel, a young girl with diabetes, described having a very good relationship with the diabetic team and ward staff: <i>'Hm, it's just the nurses really like nice. Like, the first night I was staying over they were staying it's a sleepover and stuff.'</i> (Rachel, FG1, line 746 &amp; 747) She acknowledged how continuity of care helped her become more familiar with the staff: <i>'they're always in the clinic when I am there.'</i> (Rachel, FG1, line 678) She commented on how the diabetic team got to know her, by chatting casually and taking an interest in her wider life: <i>'they like asked me what school I'm going to this year' and about 'my baby sister and stuff.'</i> (Rachel, FG1, line 815-819)</p> <p>Participants experienced some HCPs as being easier to talk to than others. Rachel felt that she could talk to the diabetic team: <i>'[...] I can talk to them more 'cos you know them.'</i> (Rachel, FG1, line 621) From the perspective of Laura, a young girl with a recent diagnosis of diabetes, a caring nature was an important factor: <i>'[HCPs who] make you feel as if they care [were easier to talk to].'</i> (Laura, FG2, line 432)</p> | <p>Laura was well informed by her hospital consultant, who had seen her when she was first diagnosed with diabetes: <i>'My consultant like came the day before [...] and he explained the whole thing in detail.'</i> (Laura, FG2, line) Laura's experience of being well informed resembled Rachel's: <i>'The doctor like normally tells me everything that I need to know anyway and they put it in like ways that I like, know.'</i> (Rachel, FG1, line 657 &amp; 658)</p> <p>Sarah, an adolescent with spina bifida and scoliosis, felt she had some control over her treatment: <i>'Uhm, I might have to get the surgery on my back, because I've got scoliosis, em, so if it gets like really, it's not too bad but if it gets worse I have to have surgery so I feel as if I have like a choice because I don't have to have it, and I don't want it. [...] I don't want to have it.'</i> (Sarah, FG2, line 743-748)</p> <p>Although all participants wanted to be informed, the oldest participant, Darren, a young boy with spina bifida and epilepsy, preferred his parents to ask and answer questions, and doctors to make decisions on his behalf:<br/> <i>'GD: Do you ever have any questions [Darren]?'<br/> Darren: Ah...don't think so.<br/> AT: Are you happy for your parents to ask the questions?<br/> Darren: Yeah.<br/> AT: And you just listen?<br/> Darren: Yeah [smiling and laughing].'</i> (Verbatim excerpt, FG1, line 555-560)</p> |
| Unfavourable experiences | <p>Sarah found it difficult to trust HCPs who were uncaring: <i>'Well yesterday I had to get a line [cannula] in and there was four different doctors that tried [...] and I thought like the doctors didn't really care, they were just gonna get it in, they didn't really care what I was thinking. [...] Well I know they needed to do it. But they didn't care, [...] they didn't care if they hurt me.'</i> (Sarah, FG2, line 438-441 &amp; 512)</p>                                                                                                                                                                                                                                                                                                                                                                                                                                                                                                                                                                                                                                                                                                                                      | <p>During her cannulation experience, Sarah felt angry because HCPs failed to grant her wishes: <i>'I always tell them to put it, try my feet first because I don't have any feeling in my feet [...] I told the doctor not to put it in there and they still did it. [...] I was really cross after it because I thought all that pain.'</i> (Sarah, FG2, line 460-465)</p> <p>Sarah spoke about feeling excluded when a doctor spoke discretely to her mother: <i>'No but it does happen to people like they feel they're left out. [...] Today, [...] a doctor was explaining something to me and he was just about to leave and when he was just about to leave he said to my mum, "If you want to ask a question I can come back" so I kind of thought is he doing that because he doesn't want me to hear my mother asking the question.'</i> (Sarah, FG2, line 612 &amp; 619-622)</p>                                                                                                                                                                                                                                                                                                                                                                                                                                                                                                                                                                     |

373 Note: Rachel, Laura, Sarah, and Darren are pseudonyms (participants aged 11-15 years)

374

27

1  
2  
3  
4  
5 **375 Box 3 Take-home messages for HCPs**  
6  
7

8 Focus group participants provided take-home messages about how HCPs, could deliver high-  
9 quality child-centred care:

- 10 1. *'Explain.'* (Laura, FG2, line 409) *'Explain it in a child friendly way.'* (Sarah, FG2, line  
11 411) *'Because if the child is really young it has to be explained in a different way. At  
12 an age you're able to understand [or HCPs will] scare them.'* (Sarah, FG2, line 658-  
13 663)  
14  
15 2. *'They should explain what they are going to do before they do it, and like [...] always  
16 say who they are and what they're gonna do [...] [and at] what time [...], and  
17 explain what was gonna happen and why [...].'* (Rachel, FG1, line 498-510)  
18  
19 3. *'I think just tell everyone together. [...] Because like telling your mum and dad first  
20 you'll see the expression on their face and then you're already gonna know.'* (Laura,  
21 FG2, line 651-654)  
22  
23 4. *'Always like ask [children] do you have any questions [...] ask [to check  
24 understanding].'* (Sarah, FG2, line 388 & 416-417)  
25  
26 5. *'Whenever [children] come in, try and treat them like nicer, em.'* (Darren, FG1, line  
27 992) *'Like treat them the same as everybody else so they all feel the same.'* (Rachel,  
28 FG1, line 993)

29 Note: Rachel, Laura, Sarah, and Darren are pseudonyms (participants aged 11-15 years)  
30

31 **377 DISCUSSION**

32  
33 378 CADs' experiences were influenced by HCPs forming relationships and involving them:

34  
35 379 engendering trust and involving CADs satisfied them, made them happier when undergoing  
36  
37 380 procedures and treatments, and better able to confide. HCPs did this by being personable, wise,  
38  
39 381 and sincere, relating at a personal level, bringing CADs into conversations and decisions, and  
40  
41 382 speaking in child-friendly ways. Conversely, not relating to or involving CADs, communicating  
42  
43 383 ineffectively by using inappropriately technical language or positioning CADs as 'piggy-in-the-  
44  
45 384 middle' between HCPs and parents resulted in CADs being fearful, angry, resistant, and  
46  
47 385 disengaged.

48  
49  
50  
51 386 These findings add to earlier studies, which identified intimate relationships,[78,111,151]  
52  
53 387 trust,[78] and involvement,[48,152] as important ingredients of caring well for CADs. They  
54  
55 388 corroborate a recent systematic review of decision-making experiences, which found that HCPs  
56  
57 389 (and parents) made adolescents feel fearful, anxious, and depersonalised when they withheld  
58  
59  
60

1  
2  
3  
4  
5 390 information or denied involvement.[152] Parents had a significant influence on HCPs'  
6  
7 391 experiences in our study too, by facilitating or impeding communication. Overcoming parental  
8  
9 392 primacy, over-involvement, over-protectiveness,[48,78,152] and wishes to withhold information  
10  
11  
12 393 remains a substantial challenge for HCPs.[78]  
13  
14

### 15 394 **Strengths and limitations**

16  
17 395 Our synthesis advances understanding of CADs' experiences of HCPs because of its  
18  
19 396 comprehensiveness, analysis of interrelationships between the nature, origins, and effects of  
20  
21 397 trust and involvement, and its advocacy for CADs' autonomy. It provides a blueprint for CCC,  
22  
23 398 which has, until now, largely depended on theory and expert consensus rather than empirical  
24  
25 399 evidence.[8] Our findings endorse the concept and importance of CCC, whilst showing how  
26  
27 400 much work is needed to put this principle into practice. Our review was innovative in the way it  
28  
29 401 used phenomenology, a theory that is highly relevant to the topic, to inform a rigorous  
30  
31 402 interpretive synthesis. This allows us to go beyond cataloguing publications and draw empirically  
32  
33 403 supported conclusions about how HCPs could care more effectively for CADs. This, we suggest, is  
34  
35 404 a significant contribution to the scholarship of evidence synthesis.  
36  
37  
38  
39  
40

41 405 As with most qualitative syntheses, we present a broad overview, whose findings are potentially  
42  
43 406 transferable across a range of clinical contexts. We took an iterative approach to article  
44  
45 407 selection and ensured adequate time for rigorous interpretive analysis; while some evidence  
46  
47 408 may have been published since we searched the databases, this is an inherent limitation in  
48  
49 409 research that goes to such lengths to analyse a huge evidence-base and synthesise information.  
50  
51 410 We doubt that this materially affects our conclusions since the nature of human relationships  
52  
53 411 are unlikely to change in 12 months. Consulting with stakeholders, whilst obviously desirable, is  
54  
55 412 often omitted from scoping reviews.[153] Our consultation sample was admittedly small and  
56  
57  
58  
59  
60

1  
2  
3  
4  
5 413 relatively homogenous, but participants spoke informatively about their experiences, which  
6  
7 414 helped consolidate and authenticate the findings.  
8  
9

10 415 Our conclusions are susceptible to both publication and interpretation bias because more  
11  
12 416 emotive material tends to attract greater attention. This limitation is partially offset by our  
13  
14 417 rigorous adherence to methodological standards. Another limitation, imposed by the non-  
15  
16 418 specific nature of studies and inexplicit reporting of metadata by primary authors, is that we  
17  
18 419 could not analyse how different types of HCP, or participants' ages or illnesses, affected CADs'  
19  
20 420 experiences. Restricting the scope to English language publications excluded non-English  
21  
22 421 speaking children from distinct cultural groups. This is an important topic for future study.  
23  
24  
25

#### 26 422 **Implications for policy, research, and practice**

27  
28  
29 423 Our findings add impetus to the movement to design, deliver, and further characterise child-  
30  
31 424 centred healthcare,[154] which has important implications for HCPs, educators, researchers, and  
32  
33 425 policymakers. Our empirical augmentation of this conceptual model supports these initiatives.  
34  
35 426 To achieve the vision of CCC, there is a need for communication strategies, training,  
36  
37 427 assessments, and feedback (from CADs, specifically) at both the undergraduate and  
38  
39 428 postgraduate levels of health professions education. Further research will be needed to address  
40  
41 429 the long-term sustainability and effectiveness of CCC. Evidence on how healthcare policy,  
42  
43 430 practice, and legislation can influence child-centred approaches is also long overdue. Further  
44  
45 431 research could also examine how age, illness, gender, and the cultures of different professions  
46  
47 432 influence the drive for CCC. Further implications for practice include the need for HCPs to  
48  
49 433 examine how professional boundaries between themselves and CADs are characterized, and  
50  
51 434 consider how best to respect CADs' preferences when it goes against 'best practice'.  
52  
53  
54  
55

#### 56 435 **ABBREVIATIONS**

1  
2  
3  
4  
5 436 CADs- Children and adolescents  
6  
7

8 437 CCC- Child-centred care  
9

10  
11 438 CINAHL- Cumulative Index to Nursing and Allied Health Literature  
12

13  
14 439 FCC- Family-centred care  
15

16  
17 440 HCPs- Healthcare professionals  
18

19  
20 441 PCC- Patient-centred care  
21

22  
23 442 RBHSC- Royal Belfast Hospital for Sick Children  
24

25  
26 443 **DECLARATIONS**  
27

28 444 **Ethics approval and consent to participate**  
29

30  
31 445 Ethical approval for focus groups was obtained from the Office for Research Ethics Committees  
32

33 446 Northern Ireland (reference: 19/NI/0070), while research governance was obtained from the  
34

35  
36 447 Belfast Health and Social Care Trust, Northern Ireland. Queen's University Belfast (QUB)  
37

38 448 sponsored the study in accordance with the UK Policy Framework for Health and Social Care.  
39  
40

41 449 **Consent for publication**  
42

43  
44 450 Consent for publication was gained.  
45  
46

47 451 **Availability of data and materials**  
48

49 452 All data are available in this article, or supplementary materials and open access repositories.  
50  
51

52 453 **Supplementary materials**  
53

54  
55 454 The content has been supplied by the authors.  
56  
57

58 455 **Competing interests**  
59  
60

1  
2  
3  
4  
5 456 None declared.  
6  
7

8 457 **Funding**  
9

10  
11 458 This work was funded by the Charitable Funds Department, Royal Belfast Hospital for Sick  
12  
13 459 Children, by award of a PhD Research Fellowship, received by GD. Grant number 71817005.  
14  
15 460 Funders had no direct involvement with conceptualisation or completion.  
16  
17

18 461 **Authors' contributions**  
19

20  
21 462 GD conceived the review, sought approvals, secured funding, led the execution, and led the  
22  
23 463 write-up. GD, AT & RC completed the focus groups. MK, RC, AT & TD assisted with data  
24  
25 464 selection, analyses, and manuscript revision. All authors read and approved the final manuscript.  
26  
27

28 465 **Acknowledgements**  
29

30  
31 466 The authors would like to acknowledge Richard Fallis, for his assistance with the search strategy,  
32  
33 467 Richard McCrory, for his advice in the early stages of this review, and Jenne McDonald, for  
34  
35 468 attending the first stakeholder consultation.  
36  
37  
38

39 469 **Authors' information**  
40

41  
42 470 GD is a doctoral student at QUB and recipient of a Research Fellowship Award from the RBHSC.  
43  
44 471 She has obtained a MB Bch BAO, MSc Clinical Education, MRCPCH (membership of RCPCH) and  
45  
46 472 has completed 6 years of paediatric specialty training.  
47  
48

49 473 MK is a General Practitioner, Associate Professor and Director of undergraduate Family  
50  
51 474 Medicine at The University of Calgary.  
52  
53

54 475 RC is a post-doctoral Clinical Academic Lecturer at QUB and a Paediatric Registrar.  
55  
56

57 476 AT is a Paediatric Consultant in RBHSC.  
58  
59  
60

1  
2  
3  
4  
5 477 TD is a Professor of Medical Education at QUB.  
6  
7

8 478 **Data availability**  
9

10  
11 479 Extra data can be accessed via the Dryad data repository at <http://datadryad.org/> with the doi:  
12  
13 480 10.5061/dryad.t76hdr817  
14  
15

16 481 **REFERENCES**  
17

- 18  
19 482 1. Wolfe A. Institute of Medicine Report: Crossing the Quality Chasm: A New Health Care  
20  
21 483 System for thr 21st Century. *Policy, Polit Nurs Pract.* 2001;2(3):233–6.  
22  
23  
24 484 2. Raleigh V, Foot C. Getting the measure of quality: Opportunites and challenges The King’s  
25  
26 485 Fund [Internet]. 2010;8:9-12. Available from: [www.kingsfund.org.uk/publications](http://www.kingsfund.org.uk/publications)  
27  
28 486 (accessed 1 September 2020).  
29  
30  
31 487 3. Doyle C, Lennox L, Bell D. A systematic review of evidence on the links between patient  
32  
33 488 experience and clinical safety and effectiveness. *BMJ Open.* 2013;3:e001570.  
34  
35 489 doi:10.1136/bmjopen-2012-001570.  
36  
37  
38  
39 490 4. Little P, Everitt H, Williamson I et al. Preferences of patients for patient centred approach  
40  
41 491 to consultation in primary care: Observational study. *Br Med J.* 2001;322(7284):468–72.  
42  
43  
44 492 5. Coulter A, Fitzpatrick R, Cornwell J. Measures of patients’ experience in hospital:  
45  
46 493 purpose, methods and uses. The King’s Fund [Internet]. 2009;(July):1–32. Available from:  
47  
48 494 [https://www.kingsfund.org.uk/sites/default/files/Point-of-Care-Measures-of-patients-](https://www.kingsfund.org.uk/sites/default/files/Point-of-Care-Measures-of-patients-experience-in-hospital-Kings-Fund-July-2009_0.pdf)  
49  
50 495 [experience-in-hospital-Kings-Fund-July-2009\\_0.pdf](https://www.kingsfund.org.uk/sites/default/files/Point-of-Care-Measures-of-patients-experience-in-hospital-Kings-Fund-July-2009_0.pdf) (accessed 10 October 2018).  
51  
52  
53  
54 496 6. Picker. Influence, inspire, empower: impact report 2017-2018 [Internet]. Oxford; 2018.  
55  
56 497 Available from: <https://www.picker.org/about-us/> (accessed 30 June 2019).  
57  
58  
59 498 7. Carter B, Bray L, Dickinson A et al. Child-Centred Nursing: Promoting Critical Thinking.  
60



- 1  
2  
3  
4  
5 499 London: Sage Publications, Ltd.; 2014.  
6  
7  
8 500 8. Coyne I, Holmström I, Söderbäck M. Centeredness in Healthcare: A Concept Synthesis of  
9  
10 501 Family-centered Care, Person-centered Care and Child-centered Care. *J Pediatr Nurs*  
11  
12 502 [Internet]. 2018;42:45–56. Available from: <https://doi.org/10.1016/j.pedn.2018.07.001>  
13  
14  
15 503 9. Pritchard Kennedy A. Systematic ethnography of school-age children with bleeding  
16  
17 504 disorders and other chronic illnesses: exploring children’s perceptions of partnership  
18  
19 505 roles in family-centred care of their chronic illness. *Child Care Health Dev.*  
20  
21 506 2012;38(6):863–9.  
22  
23  
24  
25 507 10. Sommer D, Pramling Samuelsson I, Hundeide K. Early childhood care and education: A  
26  
27 508 child perspective paradigm. *Eur Early Child Educ Res J.* 2013;21(4):459–75.  
28  
29  
30 509 11. Söderbäck M, Coyne I, Harder M. The importance of including both a child perspective  
31  
32 510 and the child’s perspective within health care settings to provide truly child-centred care.  
33  
34 511 *J Child Heal Care.* 2011;15(2):99–106.  
35  
36  
37 512 12. Hughes JC, Bamford C, May C. Types of centredness in health care: themes and concepts.  
38  
39 513 *Med Heal Care Philos.* 2008;11(4):455–63. Available from:  
40  
41 514 <https://doi.org/10.1007/s11019-008-9131-5>  
42  
43  
44  
45 515 13. Coyne I, Hallström I, Söderbäck M. Reframing the focus from a family-centred to a child-  
46  
47 516 centred care approach for children’s healthcare. *J Child Heal Care.* 2016;20(4):494–502.  
48  
49  
50 517 14. UNICEF. The United Nations Convention on the Rights of the child. UNICEF; 1990. p. 5.  
51  
52 518 Available from: [https://downloads.unicef.org.uk/wp-content/uploads/2016/08/unicef-](https://downloads.unicef.org.uk/wp-content/uploads/2016/08/unicef-convention-rights-child-uncrc.pdf)  
53  
54 519 [convention-rights-child-uncrc.pdf](https://downloads.unicef.org.uk/wp-content/uploads/2016/08/unicef-convention-rights-child-uncrc.pdf) (accessed 14 April 2018).  
55  
56  
57 520 15. GMC. 0-18 years: Guidance for all doctors [Internet]. London; 2007. Available from:  
58  
59  
60

- 1  
2  
3  
4  
5 521 <https://www.gmc-uk.org/->  
6  
7  
8 522 [/media/documents/0\\_18\\_years\\_english\\_0418pdf\\_48903188.pdf](/media/documents/0_18_years_english_0418pdf_48903188.pdf) (accessed 2 May 2018).  
9  
10 523 16. Livesley J, Long T. Children's experiences as hospital in-patients: Voice, competence and  
11  
12 524 work. Messages for nursing from a critical ethnographic study. *Int J Nurs Stud*.  
13  
14 525 2013;50(10):1292–303.  
15  
16  
17 526 17. Lachman P. Redefining the clinical gaze. *BMJ Qual Saf*. 2013;22(11):888–90.  
18  
19  
20 527 18. Doukrou M, Segal TY. Fifteen-minute consultation: Communicating with young people -  
21  
22 528 How to use HEEADSSS, a psychosocial interview for adolescents. *Arch Dis Child Educ Pract*  
23  
24 529 *Ed*. 2018;103(1):15–9.  
25  
26  
27 530 19. Levetown M. Communicating with children and families: From everyday interactions to  
28  
29 531 skill in conveying distressing information. *Pediatrics*. 2008;121(5).  
30  
31  
32 532 20. Care Quality Commission. 2016 Children and young people's inpatient and day case survey:  
33  
34 533 Statistical release [Internet]. Newcastle Upon Tyne; 2017. Available from:  
35  
36 534 <https://www.cqc.org.uk/about-us> (accessed 23 Jan 2019).  
37  
38  
39 535 21. Care Quality Commission. Children and young people's inpatient and day case survey  
40  
41 536 2014: National results [Internet]. Newcastle Upon Tyne; 2015. p. 1–78. Available from:  
42  
43 537 [https://www.cqc.org.uk/sites/default/files/20150626\\_cypsurvey\\_results\\_tables.pdf](https://www.cqc.org.uk/sites/default/files/20150626_cypsurvey_results_tables.pdf)  
44  
45 538 (accessed 9 Jan 2019).  
46  
47  
48 539 22. Linney M. RCPCH responds to CQC's Children and young people's inpatient and day case  
49  
50 540 survey [Internet]. November. 2017 [cited 2019 Jun 5]. Available from:  
51  
52 541 [https://www.rcpch.ac.uk/news-events/news/rcpch-responds-cqcs-children-young-](https://www.rcpch.ac.uk/news-events/news/rcpch-responds-cqcs-children-young-peoples-inpatient-day-case-survey)  
53  
54 542 [peoples-inpatient-day-case-survey](https://www.rcpch.ac.uk/news-events/news/rcpch-responds-cqcs-children-young-peoples-inpatient-day-case-survey)  
55  
56  
57  
58  
59  
60

- 1  
2  
3  
4  
5 543 23. Lowes L, Eddy D, Channon S, McNamara R, Robling M, Gregory JW, et al. The experience  
6  
7 544 of living with type 1 diabetes and attending clinic from the perception of children,  
8  
9 545 adolescents and carers: analysis of qualitative data from the DEPICTED study. *J Pediatr*  
10  
11 546 *Nurs.* 2015;30(1):54–62.
- 12  
13  
14  
15 547 24. NHS England; NHS Improvement and Coalition for Personalised Care. A co-production  
16  
17 548 model [Internet]. Coalition for Personalised Care. 2020 [cited 2021 Apr 28]. p. 1. Available  
18  
19 549 from: <https://coalitionforpersonalisedcare.org.uk/resources/a-co-production-model/>
- 20  
21  
22 550 25. Kennedy I. Getting it right for children and young people: Overcoming cultural barriers in  
23  
24 551 the NHS so as to meet their needs. 2010;(September):125. Available from:  
25  
26 552 <https://doi.org/10.1037/e610142011-001> (accessed 20 March 2018).
- 27  
28  
29 553 26. Royal College of Paediatrics and Child Health. The Development of a Patient Reported  
30  
31 554 Experience Measure for Paediatrics Patients (0-16 years) in Urgent and Emergency Care:  
32  
33 555 Research Report. October 2012 [Internet]. 2012. Available from:  
34  
35 556 [https://www.rcpch.ac.uk/resources/patient-reported-experience-measure-prem-urgent-](https://www.rcpch.ac.uk/resources/patient-reported-experience-measure-prem-urgent-emergency-care)  
36  
37 557 [emergency-care](https://www.rcpch.ac.uk/resources/patient-reported-experience-measure-prem-urgent-emergency-care) (accessed 21 March 2018).
- 38  
39  
40  
41 558 27. Roper L, Sherratt FC, Young B et al. Children’s views on research without prior consent in  
42  
43 559 emergency situations: A UK qualitative study. *BMJ Open.* 2018 Jun;8:e022894.  
44  
45 560 doi:10.1136/bmjopen-2018-022894 (accessed 14 Aug 2019).
- 46  
47  
48 561 28. Royal College of Paediatrics and Health. State of Child Health. 2017;(January):1–134.  
49  
50 562 Available from: [https://www.rcpch.ac.uk/system/files/protected/page/SoCH 2017 UK](https://www.rcpch.ac.uk/system/files/protected/page/SoCH%202017%20UK%20web%20updated.pdf)  
51  
52 563 [web updated.pdf](https://www.rcpch.ac.uk/system/files/protected/page/SoCH 2017 UK) (accessed 21 Jan 2020).
- 53  
54  
55 564 29. Royal College of Paediatrics and Child Health (RCPCH). State of Child Health England-Two  
56  
57 565 Years On. 2019;(January):1–24. Available from: [www.rcpch.ac.uk/state-of-child-health](http://www.rcpch.ac.uk/state-of-child-health)

- 1  
2  
3  
4  
5 566 (accessed 21 Jan 2020).  
6  
7  
8 567 30. NHS Digital. NHS Outcomes Framework 2020/21: Indicator and Domain Summary Tables  
9  
10 568 [Internet]. London; 2020. Available from: [https://digital.nhs.uk/data-and-  
12 information/publications/statistical/nhs-outcomes-framework/august-2020](https://digital.nhs.uk/data-and-<br/>11 information/publications/statistical/nhs-outcomes-framework/august-2020) (accessed 2  
13 569  
14  
15 570 Sept 2020).
- 16  
17 571 31. National Institute of Clinical Excellence. Babies, children and young people's experience  
18 of healthcare, Guideline Scope [Internet]. London; 2019. Available from:  
19  
20 572  
21  
22 573 <https://www.nice.org.uk/guidance/gid-ng10119/documents/final-scope> (accessed 3 Sept  
23 574  
24 2020).
- 25  
26 575 32. Hargreaves DS, Viner RM. Children's and young people's experience of the National  
27 Health Service in England: A review of national surveys 2001-2011. *Arch Dis Child*.  
28 576 2012;97(7):661-6.  
29  
30 577
- 31  
32 578 33. Hargreaves DS, Sizmur S, Pitchforth J et al. Children and young people's versus parents'  
33 responses in an English national inpatient survey. *Arch Dis Child*. 2018;103(5):486-91.  
34  
35 579  
36  
37 580 34. Manen M. Phenomenology of Practice: Meaning-Giving Methods in Phenomenological  
38 Research and Writing. London & New York: Routledge; 2014.  
39  
40 581
- 41  
42 582 35. Arksey H, O'Malley L. Scoping studies: Towards a methodological framework. *Int J Soc Res  
43 Methodol Theory Pract*. 2005;8(1):19-32.  
44  
45 583
- 46  
47 584 36. Levac D, Colquhoun H, O'Brien KK. Scoping studies: advancing the methodology.  
48  
49 585  
50  
51 586 37. Colquhoun HL, Levac D, O'Brien KK et al. Scoping reviews: Time for clarity in definition,  
52 methods, and reporting. *J Clin Epidemiol*. 2014;67(12):1291-4.  
53  
54  
55 587  
56  
57  
58  
59  
60

- 1  
2  
3  
4  
5 588 38. Gillespie H, Kelly M, Duggan S et al. How do patients experience caring? Scoping review.  
6  
7 589 *Patient Educ Couns*. 2017;100(9):1622–33. Available from:  
8  
9 590 <http://dx.doi.org/10.1016/j.pec.2017.03.029>  
11  
12 591 39. Lincoln YS, Guba EG. Paradigmatic controversies, contradictions, and emerging  
13  
14 592 confluences. In: Denzin NK, Lincoln YS, editors. *The SAGE Handbook of Qualitative*  
15  
16 593 *Research*. Fifth. London; 2017.  
17  
18  
19  
20 594 40. Davison G, Kelly MA, Thompson A et al. Children’s and adolescents’ experiences of  
21  
22 595 healthcare professionals: scoping review protocol. *BMC Syst Rev*. 2020;1–6. Available  
23  
24 596 from: <https://rdcu.be/b2FFk>  
25  
26  
27 597 41. Tricco AC, Lillie E, Zarin W et al. PRISMA Extension for Scoping Reviews (PRISMA-ScR):  
28  
29 598 Checklist and Explanation. *Ann Intern Med*. 2018;169(7):467–73.  
30  
31  
32 599 42. Booth A. “Brimful of STARLITE”: Toward standards for reporting literature searches. *J*  
33  
34 600 *Med Libr Assoc*. 2006;94(4):421–30.  
35  
36  
37 601 43. Peters M, Godfrey C, McInerney P et al. Scoping Reviews. In: Aromataris E, Munn Z,  
38  
39 602 editors. *Joanna Briggs Institute Reviewer’s Manual* [Internet]. JBI; 2017. Available from:  
40  
41 603 <https://doi.org/10.46658/JBIMES-20-12> (accessed 1 May 2020).  
42  
43  
44  
45 604 44. Hardin AP, Hackell JM, Simon GR et al. Age limit of pediatrics. *Pediatrics*. 2017;140(3).  
46  
47  
48 605 45. Sawyer SM, McNeil R, Francis KL et al. The age of paediatrics. *Lancet Child Adolesc Heal*  
49  
50 606 [Internet]. 2019 Nov 1;3(11):822–30. Available from: <https://doi.org/10.1016/S2352->  
51  
52 607 [4642\(19\)30266-4](https://doi.org/10.1016/S2352-4642(19)30266-4) (accessed 10 Jan 2020).  
53  
54  
55 608 46. UNICEF. Adolescents overview [Internet]. UNICEF. 2019 [cited 2021 May 7]. p. 1.  
56  
57 609 Available from: <https://data.unicef.org/topic/adolescents/overview/> (accessed 1 May  
58  
59  
60

- 1  
2  
3  
4  
5 610 2021).
- 6  
7  
8 611 47. Mays N, Pope C. Qualitative research in health care: Assessing quality in qualitative  
9  
10 612 research. *Br Med J*. 2000;320(7226):50–2.
- 11  
12  
13 613 48. Tjaden L, Tong A, Henning P et al. Children’s experiences of dialysis: A systematic review  
14  
15 614 of qualitative studies. *Arch Dis Child*. 2012;97(5):395–402.
- 16  
17  
18 615 49. Braun V, Clarke V. Using thematic analysis in psychology. *Qual Res Psychol*. 2006;3(2):77–  
19  
20 616 101.
- 21  
22  
23 617 50. Braun V, Clarke V. Successful qualitative research: a practical guide for beginners.  
24  
25 618 London: SAGE Publications Ltd; 2013.
- 26  
27  
28 619 51. QRS International. NVivo Qualitative Data Analysis Software [Internet]. 2021 [cited 2021  
29  
30 620 Jan 20]. p. 1. Available from: [https://www.qsrinternational.com/nvivo-qualitative-data-](https://www.qsrinternational.com/nvivo-qualitative-data-analysis-software/home)  
31  
32 621 [analysis-software/home](https://www.qsrinternational.com/nvivo-qualitative-data-analysis-software/home)
- 33  
34  
35  
36 622 52. Scherer KR, Shuman V et al. The GRID meets the wheel: assessing emotional feeling via  
37  
38 623 self-report. In: J.J.R. Fontaine, K.R. Scherer & C. Soriano. Components of emotional  
39  
40 624 meaning: A sourcebook. Oxford University Press, 2013;315–38.  
41  
42 625 doi:10.1093/acprof:oso/9780199592746.003.0019
- 43  
44  
45 626 53. Plutchik R. The nature of emotions: Human emotions have deep evolutionary roots, a  
46  
47 627 fact that may explain their complexity and provide tools for clinical practice. *Am Sci*.  
48  
49 628 2001;89(4):344–50.
- 50  
51  
52  
53 629 54. Gillespie H, Kelly M, Gormley G et al. How can tomorrow’s doctors be more caring? A  
54  
55 630 phenomenological investigation. *Med Educ*. 2018;52(10):1052–63.
- 56  
57  
58 631 55. Aalsma MC, Brown JR, Holloway ED et al. Connection to mental health care upon  
59  
60

- 1  
2  
3  
4  
5 632 community reentry for detained youth: a qualitative study. *BMC Public Health*.  
6  
7 633 2014;14:117.  
8  
9  
10 634 56. Alex MR, Ritchie JA. School-aged children's interpretation of their experience with acute  
11  
12 635 surgical pain. *J Pediatr Nurs*. 1992;7:171–80.  
13  
14  
15 636 57. Anderson SM, Wray J, Ralph A et al. Experiences of adolescent lung transplant recipients:  
16  
17 637 A qualitative study. *Pediatr Transplant*. 2017;21(3).  
18  
19  
20 638 58. Ångström-Brännström C, Norberg A, Jansson L. Narratives of Children With Chronic  
21  
22 639 Illness About Being Comforted. *J Pediatr Nurs*. 2008;23(4):310–6.  
23  
24  
25 640 59. Ångström-Brännström C, Norberg A. Children Undergoing Cancer Treatment Describe  
26  
27 641 Their Experiences of Comfort in Interviews and Drawings. *J Pediatr Oncol Nurs*.  
28  
29 642 2014;31(3):135–46.  
30  
31  
32  
33 643 60. Beresford BA, Sloper P. Chronically ill adolescents' experiences of communicating with  
34  
35 644 doctors: A qualitative study. *J Adolesc Heal*. 2003;33(3):172–9.  
36  
37  
38 645 61. Boyd JR, Hunsberger M. Chronically ill children coping with repeated hospitalizations:  
39  
40 646 their perceptions and suggested interventions. *J Pediatr Nurs*. 1998;13(6):330–42.  
41  
42  
43 647 62. Brown JR, Holloway ED, Akakpo TF et al. "Straight up": enhancing rapport and  
44  
45 648 therapeutic alliance with previously-detained youth in the delivery of mental health  
46  
47 649 services. *Community Ment Health J*. 2014;50(2):193–203.  
48  
49  
50  
51 650 63. Carney T, Murphy S, McClure J et al. Children's views of hospitalization: an exploratory  
52  
53 651 study of data collection. *J Child Heal Care*. 2003;7:27–40.  
54  
55  
56 652 64. Cheng S, Foster R, Hester N et al. A qualitative inquiry of Taiwanese children's pain  
57  
58 653 experiences. *J Nurs Res*. 2003;11(4):241–50.  
59  
60

- 1  
2  
3  
4  
5 654 65. Cheng Y-C, Huang C-Y, Wu W-W et al. The lived experiences of aboriginal adolescent  
6  
7 655 survivors of childhood cancer during the recovering process in Taiwan: A descriptive  
8  
9 656 qualitative research. *Eur J Oncol Nurs*. 2016;22:78–84.  
10  
11  
12 657 66. Christofides E, Dobson JA, Solomon M et al. Heuristic decision-making about research  
13  
14 658 participation in children with cystic fibrosis. *Soc Sci Med*. 2016;162:32–40.  
15  
16  
17 659 67. Clift L, Dampier S, Timmons S. Adolescents' experiences of emergency admission to  
18  
19 660 children's wards. *J Child Heal Care*. 2007;11(3):195–207.  
20  
21  
22  
23 661 68. Colver A, Pearse R, Watson RM et al. How well do services for young people with long  
24  
25 662 term conditions deliver features proposed to improve transition? *BMC Health Serv Res*.  
26  
27 663 2018 May;18. (accessed 8 Feb 2019).  
28  
29  
30 664 69. Corsano P, Cigala A, Majorano M et al. Speaking about emotional events in hospital: The  
31  
32 665 role of health-care professionals in children emotional experiences. *J Child Heal Care*.  
33  
34 666 2015;19(1):84–92.  
35  
36  
37 667 70. Coyne I, Hayes E, Gallagher P et al. Giving Children a Voice: Investigation of Children's  
38  
39 668 Experiences of Participation in Consultation and Decision-making in Irish Hospitals  
40  
41 669 [Internet]. Office of the Minister for Children. 2006. Available from:  
42  
43 670 <http://eprints.hud.ac.uk/id/eprint/25352/> (accessed 18 Jan 2018).  
44  
45  
46  
47 671 71. Coyne I. Children's experiences of hospitalization. *J Child Heal Care*. 2006;10(4):326–36.  
48  
49  
50 672 72. Coyne I. Consultation with children in hospital: Children, parents' and nurses'  
51  
52 673 perspectives. *J Clin Nurs*. 2006;15(1):61–71.  
53  
54  
55 674 73. Coyne I, Conlon J. Children's and young people's views of hospitalization: 'It's a scary  
56  
57 675 place.' *J Child Young People's Nurs*. 2007;1(1):16–21.  
58  
59  
60



- 1  
2  
3  
4  
5 676 74. Coyne I, Gallagher P. Participation in communication and decision-making: children and  
6  
7 677 young people's experiences in a hospital setting. *J Clin Nurs*. 2011;20(15/16):2334–43.  
8  
9  
10 678 75. Coyne I, Kirwan L. Ascertaining children's wishes and feelings about hospital life. *J Child*  
11  
12 679 *Health Care*. 2012;16(3):293–304.  
13  
14  
15 680 76. Coyne I, Amory A, Kiernan G et al. Children's participation in shared decision-making:  
16  
17 681 children, adolescents, parents and healthcare professionals' perspectives and  
18  
19 682 experiences. *Eur J Oncol Nurs*. 2014;18(3):273–80.  
20  
21  
22  
23 683 77. Coyne I, McNamara N, Healy M et al. Adolescents' and parents' views of Child and  
24  
25 684 Adolescent Mental Health Services (CAMHS) in Ireland. *J Psychiatr Ment Health Nurs*.  
26  
27 685 2015;22(8):561–9.  
28  
29  
30 686 78. Coyne I, Amory A, Gibson F et al. Information-sharing between healthcare professionals,  
31  
32 687 parents and children with cancer: more than a matter of information exchange. *Eur J*  
33  
34 688 *Cancer Care (Engl)*. 2016;25(1):141–56.  
35  
36  
37  
38 689 79. Curtis P, Northcott A. The impact of single and shared rooms on family-centred care in  
39  
40 690 children's hospitals. *J Clin Nurs*. 2017;26(11–12):1584–96.  
41  
42  
43 691 80. Das A, Detels R, Javanbakht M et al. Living with HIV in West Bengal, India: perceptions of  
44  
45 692 infected children and their caregivers. *AIDS Care*. 2017;29(6):800–6.  
46  
47  
48 693 81. Day C, Carey M, Surgenor T. Children's key concerns: Piloting a qualitative approach to  
49  
50 694 understanding their experience of mental health care. *Clin Child Psychol Psychiatry*.  
51  
52 695 2006;11(1):139–55.  
53  
54  
55 696 82. Dell'Api M, Rennick J, Rosmus C. Childhood chronic pain and health care professional  
56  
57 697 interactions: shaping the chronic pain experiences of children. *J Child Heal Care*.  
58  
59  
60

- 1  
2  
3  
4  
5 698 2007;11(4):269–86.  
6  
7  
8 699 83. Dixon-Woods M, Anwar Z, Young B et al. Lay evaluation of services for childhood asthma.  
9  
10 700 *Health Soc Care Community*. 2002;10(6):503–11.  
11  
12  
13 701 84. Edgecombe K, Latter S, Peters S et al. Health experiences of adolescents with  
14  
15 702 uncontrolled severe asthma. *Arch Dis Child*. 2010;95(12):985–91.  
16  
17  
18 703 85. Ekra EMR, Gjengedal E. Being hospitalized with a newly diagnosed chronic illness-A  
19  
20 704 phenomenological study of children’s lifeworld in the hospital. *Int J Qual Stud Health*  
21  
22 705 *Well-being*. 2012;7(4898):1–9.  
23  
24  
25 706 86. Engvall G, Ångström-Brännström C, Mullaney T et al. It is tough and tiring but it works-  
26  
27 707 children’s experiences of undergoing radiotherapy. *PLoS One*. 2016;11(4).  
28  
29  
30 708 87. Forsner M, Jansson L, Sørli V. The experience of being ill as narrated by hospitalized  
31  
32 709 children aged 7-10 years with short-term illness. *J Child Heal Care*. 2005;9(2):153–65.  
33  
34  
35 710 88. Forsner M, Jansson L, Söderberg A. Afraid of Medical Care. School-Aged Children’s  
36  
37 711 Narratives About Medical Fear. *J Pediatr Nurs*. 2009;24(6):519–28.  
38  
39  
40 712 89. Garth B, Murphy GC, Reddihough DS. Perceptions of participation: Child patients with a  
41  
42 713 disability in the doctor-parent-child partnership. *Patient Educ Couns*. 2009;74(1):45–52.  
43  
44  
45 714 90. Gill F, Butler S, Pistrang N. The experience of adolescent inpatient care and the  
46  
47 715 anticipated transition to the community: Young people’s perspectives. *J Adolesc*.  
48  
49 716 2016;46:57–65.  
50  
51  
52 717 91. Griffiths M, Schweitzer R, Yates P. Childhood experiences of cancer: An interpretative  
53  
54 718 phenomenological analysis approach. *J Pediatr Oncol Nurs* [Internet]. 2011;28(2):83–92.  
55  
56 719 Available from: <https://doi.org/10.1177/1043454210377902> (accessed 16 Aug 2019).  
57  
58  
59  
60

- 1  
2  
3  
4  
5 720 92. Haase J, Rostad M. Experiences of completing cancer therapy: Children's Perspectives.  
6  
7 721 *Oncol Nurs Forum*. 1994;21:1483–92.  
8  
9  
10 722 93. Hall MJ, Gibson BJ, James A et al. Children's and Adolescents' Perspectives on Cleft Lip  
11  
12 723 and/or Palate. *Cleft Palate-craniofacial J*. 2013 Mar;50(2):E18–26.  
13  
14  
15 724 94. Han J, Liu J-E, Xiao Q et al. The Experiences and Feelings of Chinese Children Living With  
16  
17 725 Leukemia A Qualitative Study. *Cancer Nurs*. 2011;34(2):134–41.  
18  
19  
20 726 95. Hanson A, Drendel AL. A qualitative study of the at-home pain experience for children  
21  
22 727 with an arm fracture. *Paediatr Child Heal*. 2017;22(4):207–10.  
23  
24  
25 728 96. Harper B, Dickson J, Bramwell R. Experiences of young people in a 16-18 Mental Health  
26  
27 729 Service. *Child Adolesc Ment Health*. 2014;19:90–6.  
28  
29  
30 730 97. Hart T, O'Reilly M. 'The challenges of sharing information when a young person is  
31  
32 731 experiencing severe emotional difficulties': implications for schools and CAMHS. *Child*  
33  
34 732 *Adolesc Ment Health*. 2018;23(3):235–42.  
35  
36  
37 733 98. Hawthorne K, Bennert K, Lowes L et al. The experiences of children and their parents in  
38  
39 734 paediatric diabetes services should inform the development of communication skills for  
40  
41 735 healthcare staff (the DEPICTED Study). *Diabet Med*. 2011;28(9):1103–8.  
42  
43  
44 736 99. Hinton D, Kirk S. Paediatric multiple sclerosis: a qualitative study of families' diagnosis  
45  
46 737 experiences. *Arch Dis Child*. 2015;100(7):623–9.  
47  
48  
49 738 100. Hodgins M, Lander J. Children's Coping with Venipuncture. *J Pain Symptom Manage*.  
50  
51 739 1997;13(5):274–85.  
52  
53  
54 740 101. Hutton A. Consumer perspectives in adolescent ward design. *J Clin Nurs*. 2005;14(5):537–  
55  
56 741 45.  
57  
58  
59  
60

- 1  
2  
3  
4  
5 742 102. Jachyra P, Anagnostou E, Knibbe TJ et al. "Girls don't have big tummies": The experiences  
6  
7 743 of weight-related discussions for children with autism spectrum disorders. *Autism*.  
8  
9 744 2018;00(0):1–10.  
10  
11  
12 745 103. Jachyra P, Anagnostou E, Knibbe TJ et al. Weighty Conversations: Caregivers', Children's,  
13  
14 746 and Clinicians' Perspectives and Experiences of Discussing Weight-Related Topics in  
15  
16 747 Healthcare Consultations. *Autism Res*. 2018 Nov;11(11):1500–10.  
17  
18  
19 748 104. Jensen CS, Jackson K, Kolbæk R et al. Children's experiences of acute hospitalisation to a  
20  
21 749 paediatric emergency and assessment unit - A qualitative study. *J Child Heal Care*.  
22  
23 750 2012;16(3):263–73.  
24  
25  
26 751 105. Jongudomkarn D, Aungsupakorn N, Camfield L. The meanings of pain: A qualitative study  
27  
28 752 of the perspectives of children living with pain in north-eastern Thailand. *Nurs Heal Sci*.  
29  
30 753 2006;8(3):156–63.  
31  
32  
33 754 106. Kluthe C, Isaac D, Hiller K et al. Qualitative Analysis of Pediatric Patient and Caregiver  
34  
35 755 Perspectives After Recent Diagnosis With Inflammatory Bowel Disease. *J Pediatr Nurs*.  
36  
37 756 2018;38:106–13.  
38  
39  
40 757 107. Koller D, Nicholas D, Gearing R et al. Paediatric pandemic planning: children's  
41  
42 758 perspectives and recommendations. *Health Soc Care Community*. 2010;18(4):369–77.  
43  
44  
45 759 108. Koller D. "Kids need to talk too": inclusive practices for children's healthcare education  
46  
47 760 and participation. *J Clin Nurs*. 2017;26(17–18):2657–68.  
48  
49  
50 761 109. Kortessluoma R, Nikkonen M. "The most disgusting ever": Children's pain descriptions and  
51  
52 762 views of the purpose of pain. *J Child Heal Care*. 2006;10(3):213–27.  
53  
54  
55 763 110. Kortessluoma R-L, Nikkonen M, Serlo W. "You Just Have to Make the Pain Go Away"-  
56  
57  
58  
59  
60

- 1  
2  
3  
4  
5 764 Children's Experiences of Pain Management. *Pain Manag Nurs*. 2008;9(4):143-149.e5.  
6  
7  
8 765 111. Lewis P, Kelly M, Wilson V et al. What did they say? How children, families and nurses  
9  
10 766 experience 'care.' *J Child Young People's Nurs*. 2007;1(6):259-66.  
11  
12  
13 767 112. Macartney G, Stacey D, Harrison MB et al. Symptoms, coping, and quality of life in  
14  
15 768 pediatric brain tumor survivors: A qualitative study. *Oncol Nurs Forum*. 2014;41(4):390-8.  
16  
17  
18 769 113. Manookian A, Nasrabadi AN, Asadi M. Children's lived experiences of hematopoietic  
19  
20 770 stem cell transplantation. *Nurs Heal Sci*. 2014;16(3):314-20.  
21  
22  
23 771 114. Marcinowicz L, Abramowicz P, Zarzycka D et al. How hospitalized children and parents  
24  
25 772 perceive nurses and hospital amenities: A qualitative descriptive study in Poland. *J Child*  
26  
27 773 *Heal Care*. 2016;20(1):120-8.  
28  
29  
30  
31 774 115. Marshman Z, Gibson BJ, Benson PE. Is the short-form child perceptions questionnaire  
32  
33 775 meaningful and relevant to children with malocclusion in the UK? *J Orthod*.  
34  
35 776 2010;37(1):29-36.  
36  
37  
38 777 116. McNelis AM, Buelow J, Myers J et al. Concerns and needs of children with epilepsy and  
39  
40 778 their parents. *Clin Nurse Spec*. 2007;21(4):195-202.  
41  
42  
43 779 117. McPherson AC, Swift JA, Peters M et al. Communicating about obesity and weight-related  
44  
45 780 topics with children with a physical disability and their families: spina bifida as an  
46  
47 781 example. *Disabil Rehabil*. 2017;39(8):791-7.  
48  
49  
50  
51 782 118. McPherson AC, Knibbe TJ, Oake M et al. "Fat is really a four-letter word": Exploring  
52  
53 783 weight-related communication best practices in children with and without disabilities and  
54  
55 784 their caregivers. *Child Care Health Dev*. 2018;44(4):636-43.  
56  
57  
58 785 119. Moules T. "They wouldn't know how it feels...": Characteristics of quality care from  
59  
60

- 1  
2  
3  
4  
5 786 young people's perspectives: A participatory research project. *J Child Heal Care*.  
6  
7 787 2009;13(4):322–32.  
8  
9  
10 788 120. Nguyen TN, Nilsson S, Hellström A-L et al. Music therapy to reduce pain and anxiety in  
11  
12 789 children with cancer undergoing lumbar puncture: A randomized clinical trial. *J Pediatr*  
13  
14 790 *Oncol Nurs*. 2010;27(3):146–55.  
15  
16  
17 791 121. Nilsson S, Hallqvist C, Sidenvall B et al. Children's experiences of procedural pain  
18  
19 792 management in conjunction with trauma wound dressings. *J Adv Nurs*. 2011;67(7):1449–  
20  
21 793 57.  
22  
23  
24 794 122. Norena Pena AL, Cibanal Juan L. The experience of hospitalized children regarding their  
25  
26 795 interactions with nursing professionals. *Rev Lat Am Enfermagem*. 2011;19(6):1429–36.  
27  
28  
29 796 123. Noreña Peña AL, Rojas JG. Ethical aspects of children's perceptions of information-giving  
30  
31 797 in care. *Nurs Ethics*. 2014;21(2):245–56.  
32  
33  
34 798 124. Olausson B, Utbult Y, Hansson S et al. Transplanted children's experiences of daily living:  
35  
36 799 Children's narratives about their lives following transplantation. *Pediatr Transplant*.  
37  
38 800 2006;10(5):575–85.  
39  
40  
41 801 125. Pelander T, Leino-Kilpi H. Quality in pediatric nursing care: Children's expectations.  
42  
43 802 *Compr Child Adolesc Nurs*. 2004;27(3):139–51.  
44  
45  
46 803 126. Pelander T, Leino-Kilpi H. Children's best and worst experiences during hospitalisation.  
47  
48 804 *Scand J Caring Sci*. 2010;24(4):726–33.  
49  
50  
51 805 127. Pölkki T, Pietilä A, Rissanen L et al. Pain in children: qualitative research of Finnish school-  
52  
53 806 aged children's experiences of pain in hospital. *Int J Nurs Pract*. 1999;5(1):21–8.  
54  
55  
56 807 128. Pope N, Tallon M, Leslie G et al. Ask me: Children's experiences of pain explored using  
57  
58  
59  
60

- 1  
2  
3  
4  
5 808 the draw, write, and tell method. *J Spec Pediatr Nurs*. 2018 Jul;23:e12218.  
6  
7 809 <https://doi.org/10.1111/jspn.12218> (accessed 8 Feb 2019).  
8  
9  
10 810 129. Randall D. Children's regard for nurses and nursing: A mosaic of children's views on  
11  
12 811 community nursing. *J Child Heal Care*. 2012;16(1):91–104.  
13  
14  
15 812 130. Rankin D, Harden J, Barnard KD et al. Pre-adolescent children's experiences of receiving  
16  
17 813 diabetes-related support from friends and peers: A qualitative study. *Heal Expect*. 2018  
18  
19 814 Oct;21(5):870–7.  
20  
21  
22  
23 815 131. Ruhe KM, Wangmo T, De Clercq E et al. Putting patient participation into practice in  
24  
25 816 pediatrics-results from a qualitative study in pediatric oncology. *Eur J Pediatr*.  
26  
27 817 2016;175(9):1147–55.  
28  
29  
30 818 132. Ryals J. Liberated voices: Juvenile offenders' perceptions of therapeutic relationships. *J*  
31  
32 819 *Theor Philos Criminol*. 2011;3(2):1–26.  
33  
34  
35 820 133. Saarikoski A, Koppeli R, Salanterä S et al. Voiding school as a treatment of daytime  
36  
37 821 incontinence or enuresis: Children's experiences of the intervention. *J Pediatr Urol*.  
38  
39 822 2018;14(1):56.e1-56.e7.  
40  
41  
42  
43 823 134. Salmela M, Aronen ET, Salanterä S. The experience of hospital-related fears of 4- to 6-  
44  
45 824 year-old children. *Child Care Health Dev*. 2010;37(5):719–26.  
46  
47  
48 825 135. Schalkers I, Dedding CWM, Bunders JFG. "[I would like] a place to be alone, other than  
49  
50 826 the toilet" - Children's perspectives on paediatric hospital care in the Netherlands. *Heal*  
51  
52 827 *Expect*. 2014;18(6):2066–78.  
53  
54  
55 828 136. Schmidt C, Bernaix L, Koski A et al. Hospitalized Children's Perceptions of Nurses and  
56  
57 829 Nurse Behaviours. *Am J Matern Child Nurs*. 2007;32(6):336–42.  
58  
59  
60

- 1  
2  
3  
4  
5 830 137. Spalding J, Yardley S. 'The nice thing about doctors is that you can sometimes get a day  
6  
7 831 off school': an action research study to bring lived experiences from children, parents and  
8  
9 832 hospice staff into medical students' preparation for practice. *BMJ Support Palliat Care*.  
10  
11 833 2016 Dec;6(4):459–64.
- 12  
13  
14  
15 834 138. Stevens B, McKeever P, Law MP et al. Children receiving chemotherapy at home:  
16  
17 835 Perceptions of children and parents. *J Pediatr Oncol Nurs*. 2006;23(5):276–85.
- 18  
19  
20 836 139. Taylor RM, Franck LS, Dhawan A et al. The stories of young people living with a liver  
21  
22 837 transplant. *Qual Health Res*. 2010;20(8):1076–90.
- 23  
24  
25 838 140. Vejzovic V, Wennick A, Idvall E et al. A private affair: Children's experiences prior to  
26  
27 839 colonoscopy. *J Clin Nurs*. 2014;24(7–8):1038–47.
- 28  
29  
30 840 141. Vindrola-Padros C. The Everyday Lives of Children with Cancer in Argentina: Going  
31  
32 841 beyond the Disease and Treatment. *Child Soc*. 2012;26(6):430–42.
- 33  
34  
35 842 142. Wangmo T, Ruhe KM, Badarau DO et al. Parents' and patients' experiences with  
36  
37 843 paediatric oncology care in Switzerland--satisfaction and some hurdles. *Swiss Med Wkly*.  
38  
39 844 2016;146:w14309. <https://dx.doi.org/10.4414/smw.2016.14309> (accessed 15 Feb 2018).
- 40  
41  
42  
43 845 143. Watson AC, Kelly BL, Vidalon TM. Examining the meaning attached to mental illness and  
44  
45 846 mental health services among justice system-involved youth and their parents. *Qual*  
46  
47 847 *Health Res*. 2009;19(8):1087–99.
- 48  
49  
50 848 144. Wen SQ, Taylor BJ, Lixia Z et al. Children's experiences of their postoperative pain  
51  
52 849 management: A qualitative systematic review. *JBI Database Syst Rev Implement Reports*.  
53  
54 850 2013;22(7):958–968.
- 55  
56  
57 851 145. Wise B. In their own words: the lived experience of pediatric liver transplantation. *Qual*



- 1  
2  
3  
4  
5 852 *Health Res.* 2002;12(1):74–90.  
6  
7  
8 853 146. Wong EMY, Sit JWH, Tarrant MA et al. The perceptions of obese school children in Hong  
9  
10 854 Kong toward their weight-loss experience. *J Sch Nurs.* 2012;28(5):370–8.  
11  
12  
13 855 147. Woodgate RL. Feeling states: a new approach to understanding how children and  
14  
15 856 adolescents with cancer experience symptoms. *Cancer Nurs.* 2008;31(3):229–38.  
16  
17  
18 857 148. Wray J, Hobden S, Knibbs S et al. Hearing the voices of children and young people to  
19  
20 858 develop and test a patient-reported experience measure in a specialist paediatric setting.  
21  
22  
23 859 *Arch Dis Child.* 2018;103:272–9.  
24  
25  
26 860 149. Xie A, Shan Y, Niu M et al. Experience and nursing needs of school-age children  
27  
28 861 undergoing lumbar puncture during the treatment of acute lymphoblastic leukaemia: a  
29  
30 862 descriptive and qualitative study. *J Clin Nurs.* 2016 Nov;26(21–22):3328–35.  
31  
32  
33 863 150. Young B, Dixon-woods M, Windridge KC et al. Managing communication with young  
34  
35 864 people who have a life threatening chronic illness: a qualitative study of patients and  
36  
37 865 parents. *Br Med J.* 2003;326(7384):305.  
38  
39  
40 866 151. Corsano P, Majorano M, Vignola V et al. Hospitalized children’s representations of their  
41  
42 867 relationship with nurses and doctors. *J Child Heal Care.* 2013;17(3):294–304.  
43  
44  
45 868 152. Jordan A, Wood F, Edwards A et al. What adolescents living with long-term conditions say  
46  
47 869 about being involved in decision-making about their healthcare: A systematic review and  
48  
49 870 narrative synthesis of preferences and experiences. *Patient Educ Couns* [Internet].  
50  
51 871 2018;101(10):1725–35. Available from: <http://dx.doi.org/10.1016/j.pec.2018.06.006>  
52  
53  
54  
55 872 153. Pham MT, Rajić A, Greig JD et al. A scoping review of scoping reviews: Advancing the  
56  
57 873 approach and enhancing the consistency. *Res Synth Methods.* 2014;5(4):371–85.  
58  
59  
60

- 1  
2  
3  
4  
5 874 154. Ford K, Campbell S, Carter B et al. The concept of child-centered care in healthcare: a  
6  
7 875 scoping review protocol. *JBI database Syst Rev Implement reports*. 2018;16(4):845–51.  
8  
9

10 876 **FIGURE CAPTIONS**  
11  
12

- 13 877 Figure 1 PRISMA flow diagram  
14  
15  
16  
17  
18  
19  
20  
21  
22  
23  
24  
25  
26  
27  
28  
29  
30  
31  
32  
33  
34  
35  
36  
37  
38  
39  
40  
41  
42  
43  
44  
45  
46  
47  
48  
49  
50  
51  
52  
53  
54  
55  
56  
57  
58  
59  
60

For peer review only

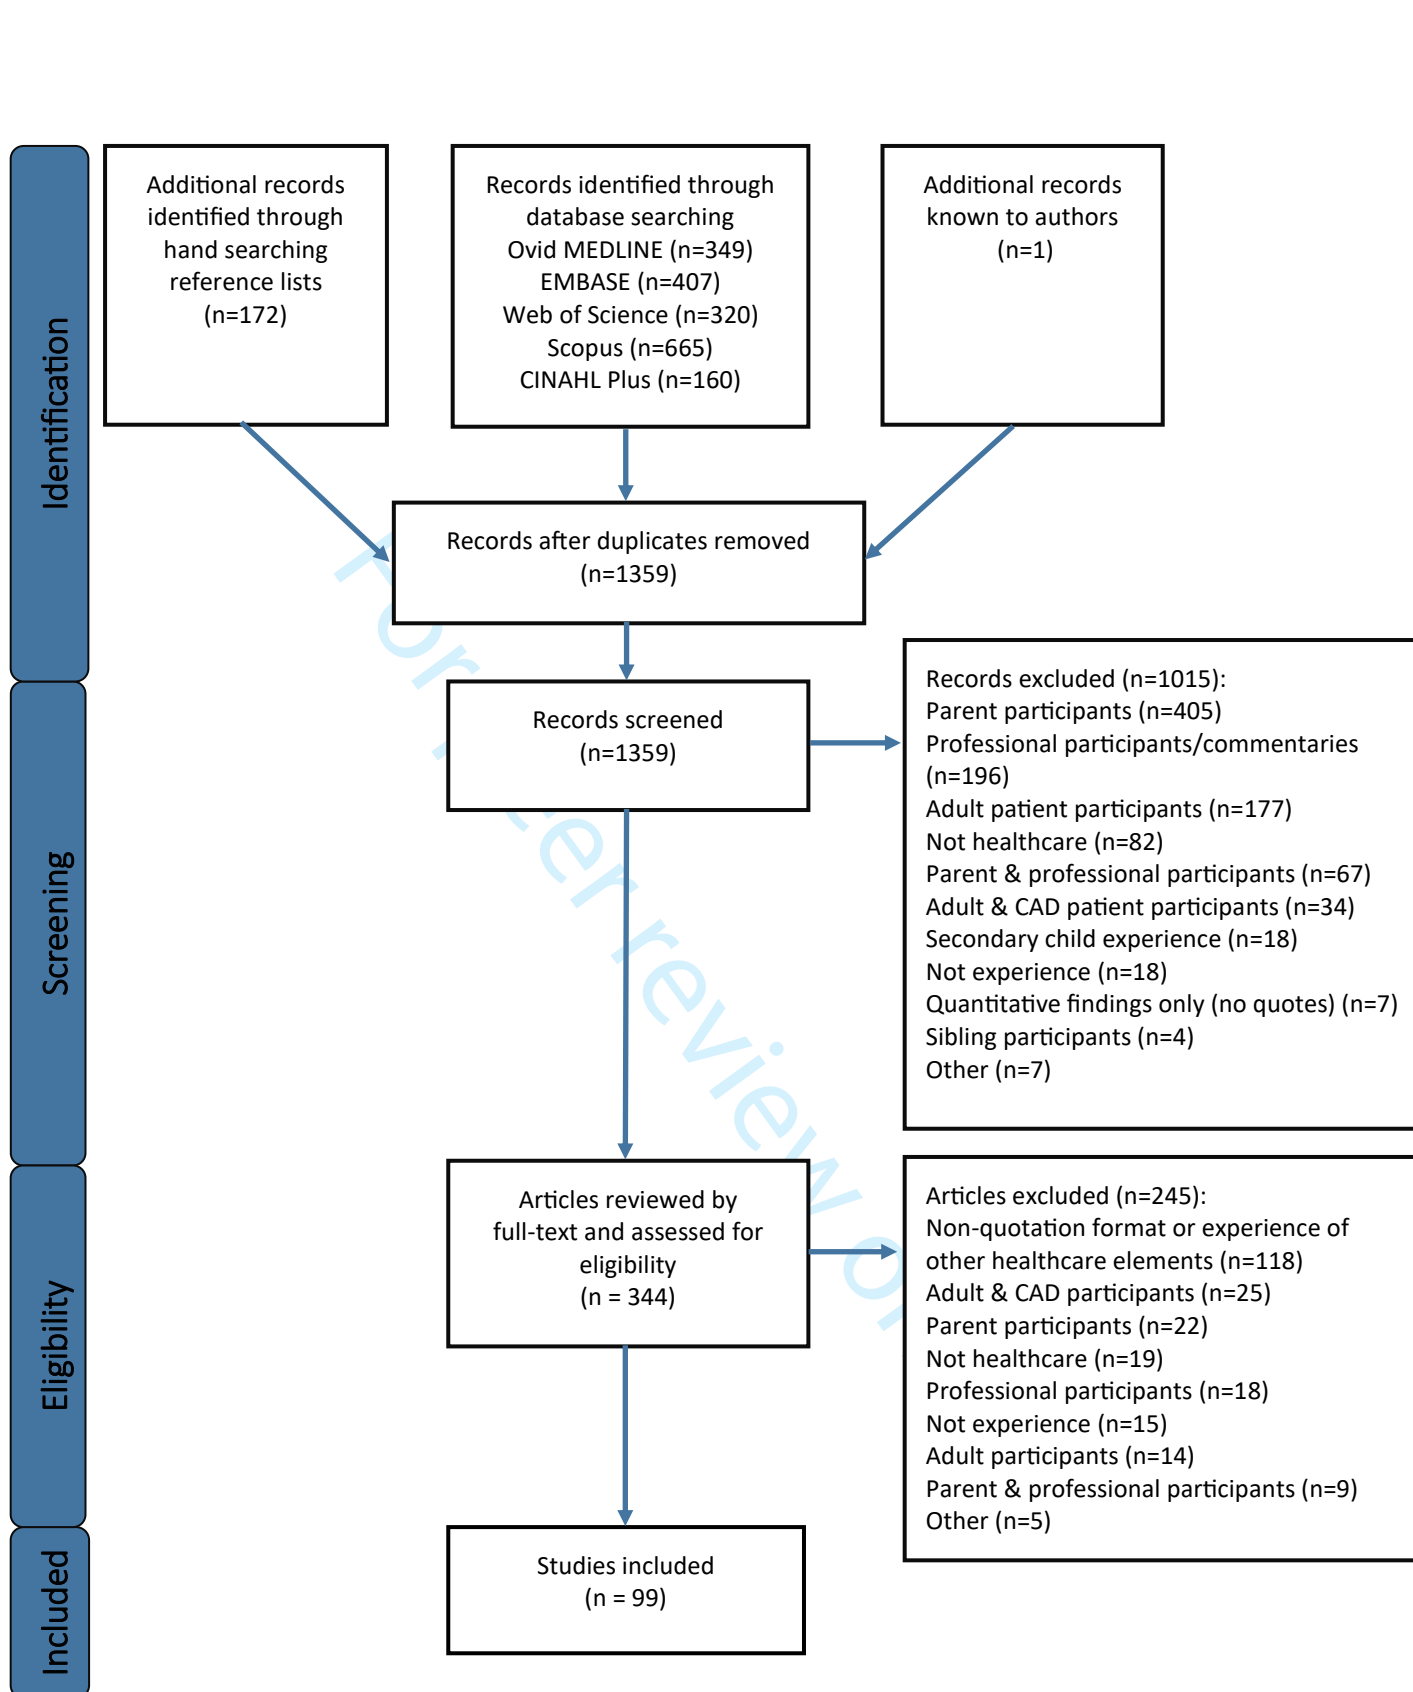

Note 'Other' (n=12) reasons for excluding records/articles included: participants' ages unclear (n=4); no full-text available or unobtainable in English (n=7); same study as included article (n=1).

### PRISMA-ScR Checklist

This supplementary information includes the Preferred Reporting Items for Systematic reviews and Meta-Analyses extension for Scoping Reviews (PRISMA-ScR) Checklist (1).

| SECTION                           | ITEM | PRISMA-ScR CHECKLIST ITEM                                                                                                                                                                                                                                                                                  | REPORTED ON PAGE # (untracked version)                             |
|-----------------------------------|------|------------------------------------------------------------------------------------------------------------------------------------------------------------------------------------------------------------------------------------------------------------------------------------------------------------|--------------------------------------------------------------------|
| <b>TITLE</b>                      |      |                                                                                                                                                                                                                                                                                                            |                                                                    |
| Title                             | 1    | Identify the report as a scoping review.                                                                                                                                                                                                                                                                   | p.1                                                                |
| <b>ABSTRACT</b>                   |      |                                                                                                                                                                                                                                                                                                            |                                                                    |
| Structured summary                | 2    | Provide a structured summary that includes (as applicable): background, objectives, eligibility criteria, sources of evidence, charting methods, results, and conclusions that relate to the review questions and objectives.                                                                              | p.3-4, background not required in abstract as per journal guidance |
| <b>INTRODUCTION</b>               |      |                                                                                                                                                                                                                                                                                                            |                                                                    |
| Rationale                         | 3    | Describe the rationale for the review in the context of what is already known. Explain why the review questions/objectives lend themselves to a scoping review approach.                                                                                                                                   | p.6-8                                                              |
| Objectives                        | 4    | Provide an explicit statement of the questions and objectives being addressed with reference to their key elements (e.g., population or participants, concepts, and context) or other relevant key elements used to conceptualize the review questions and/or objectives.                                  | p.8 & 9                                                            |
| <b>METHODS</b>                    |      |                                                                                                                                                                                                                                                                                                            |                                                                    |
| Protocol and registration         | 5    | Indicate whether a review protocol exists; state if and where it can be accessed (e.g., a Web address); and if available, provide registration information, including the registration number.                                                                                                             | p.9 and reference list. Not registered.                            |
| Eligibility criteria              | 6    | Specify characteristics of the sources of evidence used as eligibility criteria (e.g., years considered, language, and publication status), and provide a rationale.                                                                                                                                       | p.9-12 (Table 2)                                                   |
| Information sources*              | 7    | Describe all information sources in the search (e.g., databases with dates of coverage and contact with authors to identify additional sources), as well as the date the most recent search was executed.                                                                                                  | p. 9 & 10 (Table 1)                                                |
| Search                            | 8    | Present the full electronic search strategy for at least 1 database, including any limits used, such that it could be repeated.                                                                                                                                                                            | p. 9 & 10, Supp file 2                                             |
| Selection of sources of evidence† | 9    | State the process for selecting sources of evidence (i.e., screening and eligibility) included in the scoping review.                                                                                                                                                                                      | p. 10 & 11                                                         |
| Data charting process‡            | 10   | Describe the methods of charting data from the included sources of evidence (e.g., calibrated forms or forms that have been tested by the team before their use, and whether data charting was done independently or in duplicate) and any processes for obtaining and confirming data from investigators. | p. 13 (box 2)                                                      |
| Data items                        | 11   | List and define all variables for which data were                                                                                                                                                                                                                                                          | p. 13                                                              |

| SECTION                                                           | ITEM | PRISMA-ScR CHECKLIST ITEM                                                                                                                                                                             | REPORTED ON PAGE # (untracked version)         |
|-------------------------------------------------------------------|------|-------------------------------------------------------------------------------------------------------------------------------------------------------------------------------------------------------|------------------------------------------------|
|                                                                   |      | sought and any assumptions and simplifications made.                                                                                                                                                  |                                                |
| Critical appraisal of individual sources of evidence <sup>§</sup> | 12   | If done, provide a rationale for conducting a critical appraisal of included sources of evidence; describe the methods used and how this information was used in any data synthesis (if appropriate). | Critical appraisal not done. Rationale on p.11 |
| Synthesis of results                                              | 13   | Describe the methods of handling and summarizing the data that were charted.                                                                                                                          | p. 13-15                                       |
| <b>RESULTS</b>                                                    |      |                                                                                                                                                                                                       |                                                |
| Selection of sources of evidence                                  | 14   | Give numbers of sources of evidence screened, assessed for eligibility, and included in the review, with reasons for exclusions at each stage, ideally using a flow diagram.                          | p. 15 (Figure 1)                               |
| Characteristics of sources of evidence                            | 15   | For each source of evidence, present characteristics for which data were charted and provide the citations.                                                                                           | p. 15 (Table 2)                                |
| Critical appraisal within sources of evidence                     | 16   | If done, present data on critical appraisal of included sources of evidence (see item 12).                                                                                                            | N/A                                            |
| Results of individual sources of evidence                         | 17   | For each included source of evidence, present the relevant data that were charted that relate to the review questions and objectives.                                                                 | p. 15 (Table 2) & Dryad data                   |
| Synthesis of results                                              | 18   | Summarize and/or present the charting results as they relate to the review questions and objectives.                                                                                                  | p. 15, 16, 23-26, & supp file 4.               |
| <b>DISCUSSION</b>                                                 |      |                                                                                                                                                                                                       |                                                |
| Summary of evidence                                               | 19   | Summarize the main results (including an overview of concepts, themes, and types of evidence available), link to the review questions and objectives, and consider the relevance to key groups.       | p. 29-30                                       |
| Limitations                                                       | 20   | Discuss the limitations of the scoping review process.                                                                                                                                                | P. 30-31                                       |
| Conclusions                                                       | 21   | Provide a general interpretation of the results with respect to the review questions and objectives, as well as potential implications and/or next steps.                                             | p. 31                                          |
| <b>FUNDING</b>                                                    |      |                                                                                                                                                                                                       |                                                |
| Funding                                                           | 22   | Describe sources of funding for the included sources of evidence, as well as sources of funding for the scoping review. Describe the role of the funders of the scoping review.                       | p. 32                                          |

JB1 = Joanna Briggs Institute; PRISMA-ScR = Preferred Reporting Items for Systematic reviews and Meta-Analyses extension for Scoping Reviews.

\* Where *sources of evidence* (see second footnote) are compiled from, such as bibliographic databases, social media platforms, and Web sites.

† A more inclusive/heterogeneous term used to account for the different types of evidence or data sources (e.g., quantitative and/or qualitative research, expert opinion, and policy documents) that may be eligible in a scoping review as opposed to only studies. This is not to be confused with *information sources* (see first footnote).

‡ The frameworks by Arksey and O'Malley (6) and Levac and colleagues (7) and the JBI guidance (4, 5) refer to the process of data extraction in a scoping review as data charting.

§ The process of systematically examining research evidence to assess its validity, results, and relevance before using it to inform a decision. This term is used for items 12 and 19 instead of "risk of bias" (which is more applicable

1  
2  
3 to systematic reviews of interventions) to include and acknowledge the various sources of evidence that may be used  
4 in a scoping review (e.g., quantitative and/or qualitative research, expert opinion, and policy document).  
5

6  
7 REFERENCE:

- 8  
9 1. Tricco AC, Lillie E, Zarin W, O'Brien KK, Colquhoun H, Levac D, et al. PRISMA extension for scoping reviews (PRISMA-  
10 ScR): Checklist and explanation. *Ann Intern Med.* 2018;169(7):467–73. doi: [10.7326/M18-0850](https://doi.org/10.7326/M18-0850).  
11  
12  
13  
14  
15  
16  
17  
18  
19  
20  
21  
22  
23  
24  
25  
26  
27  
28  
29  
30  
31  
32  
33  
34  
35  
36  
37  
38  
39  
40  
41  
42  
43  
44  
45  
46  
47  
48  
49  
50  
51  
52  
53  
54  
55  
56  
57

For peer review only



| MEDLINE search |                                                                                                                                                                                                                                                                                            |
|----------------|--------------------------------------------------------------------------------------------------------------------------------------------------------------------------------------------------------------------------------------------------------------------------------------------|
| 1.             | health?care.mp.                                                                                                                                                                                                                                                                            |
| 2.             | Hospitals/                                                                                                                                                                                                                                                                                 |
| 3.             | Community Mental Health Services/ or Mental Health Services/ or Community Health Services/ or Community Health Nursing/                                                                                                                                                                    |
| 4.             | School Health Services/                                                                                                                                                                                                                                                                    |
| 5.             | 1 or 2 or 3 or 4                                                                                                                                                                                                                                                                           |
| 6.             | Stress, Psychological/                                                                                                                                                                                                                                                                     |
| 7.             | Emotions/                                                                                                                                                                                                                                                                                  |
| 8.             | emotion*.mp.                                                                                                                                                                                                                                                                               |
| 9.             | experienc*.mp.                                                                                                                                                                                                                                                                             |
| 10.            | 6 or 7 or 8 or 9                                                                                                                                                                                                                                                                           |
| 11.            | 5 and 10                                                                                                                                                                                                                                                                                   |
| 12.            | limit 11 to "all child (0 to 18 years)"                                                                                                                                                                                                                                                    |
| 13.            | ((child* or infant* or adolescen* or teen?age* or boy* or girl* or toddler*) adj5 (view* or opinion* or feeling* or emotion* or experience* or perception* or first?hand* or their* or say?in or decision* or choice* or choos* or autonomon* or interview* or art or "art* therap*")).mp. |
| 14.            | 12 and 13                                                                                                                                                                                                                                                                                  |
| 15.            | Qualitative Research/                                                                                                                                                                                                                                                                      |
| 16.            | 14 and 15                                                                                                                                                                                                                                                                                  |

key: mp, multi-purpose search; adj5, search within adjacent 5 words.

## Braun &amp; Clarke 15-point Thematic Analysis Checklist

| Process        | No. | Criteria                                                                                                                                                        | Response                                                                                                                                                                                                                                                                                                                                                           |
|----------------|-----|-----------------------------------------------------------------------------------------------------------------------------------------------------------------|--------------------------------------------------------------------------------------------------------------------------------------------------------------------------------------------------------------------------------------------------------------------------------------------------------------------------------------------------------------------|
| Transcription  | 1   | The data have been transcribed to an appropriate level of detail, and the transcripts have been checked against the tapes for 'accuracy'                        | Both focus group transcripts transcribed to an appropriate level of detail and checked against tapes.                                                                                                                                                                                                                                                              |
| Coding         | 2   | Each data item has been given equal attention in the coding process                                                                                             | We reviewed all quotations to generate coding.                                                                                                                                                                                                                                                                                                                     |
|                | 3   | Themes have not been generated from a few vivid examples (an anecdotal approach), but instead the coding process has been thorough, inclusive and comprehensive | Themes, and the findings described herein, were developed from a complete coding process of the entire dataset. The coding process was thorough, inclusive and comprehensive, as all quotations were used to generate codes, and develop themes. Each theme was developed based on numerous codes gathered across a range of articles and participants quotations. |
|                | 4   | All relevant extracts for all each theme have been collated                                                                                                     | Yes.                                                                                                                                                                                                                                                                                                                                                               |
|                | 5   | Themes have been checked against each other and back to the original data set                                                                                   | Yes.                                                                                                                                                                                                                                                                                                                                                               |
|                | 6   | Themes are internally coherent, consistent, and distinctive                                                                                                     | Yes.                                                                                                                                                                                                                                                                                                                                                               |
| Analysis       | 7   | Data have been analysed- interpreted, made sense of- rather than just paraphrased or described                                                                  | Yes, evident from the results.                                                                                                                                                                                                                                                                                                                                     |
|                | 8   | Analysis and data match each other- the extracts illustrate the analytic claims                                                                                 | The analysis and findings from it closely match the data set.                                                                                                                                                                                                                                                                                                      |
|                | 9   | Analysis tells a convincing and well-organised story about the data and topic                                                                                   | Yes.                                                                                                                                                                                                                                                                                                                                                               |
|                | 10  | A good balance between analytical narrative and illustrative extracts is provided                                                                               | Yes. Illustrative extracts have been used within the results section.                                                                                                                                                                                                                                                                                              |
| Overall        | 11  | Enough time has been allocated to complete all phases of the analysis adequately, without rushing a phase or giving it a once-over-lightly                      | Yes.                                                                                                                                                                                                                                                                                                                                                               |
| Written report | 12  | The assumptions about, and specific approach to, thematic analysis are clearly explicated                                                                       | Yes, stated in the methods section.                                                                                                                                                                                                                                                                                                                                |
|                | 13  | There is good fit between what you claim you do, and what you show you have done- i.e. described method and reported analysis are consistent                    | Yes.                                                                                                                                                                                                                                                                                                                                                               |



|  |    |                                                                                                               |      |
|--|----|---------------------------------------------------------------------------------------------------------------|------|
|  | 14 | The language and concepts used in the report are consistent with the epistemological position of the analysis | Yes. |
|  | 15 | The researcher is positioned as <i>active</i> in the research process; themes do not just 'emerge'            | Yes. |

## REFERENCE:

1. Braun V, Clarke V. Successful qualitative research: a practical guide for beginners. London: SAGE Publications Ltd; 2013.

### **Additional Scoping Review Results: Basic numerical analysis and figures**

This supplementary information includes additional findings and graphical illustrations from basic numerical analysis.

#### *Trend in study publications over time*

On average, four studies were published each year and the rate of publication rose progressively, increasing to 11 per year in 2018 (as shown in Figure 1).

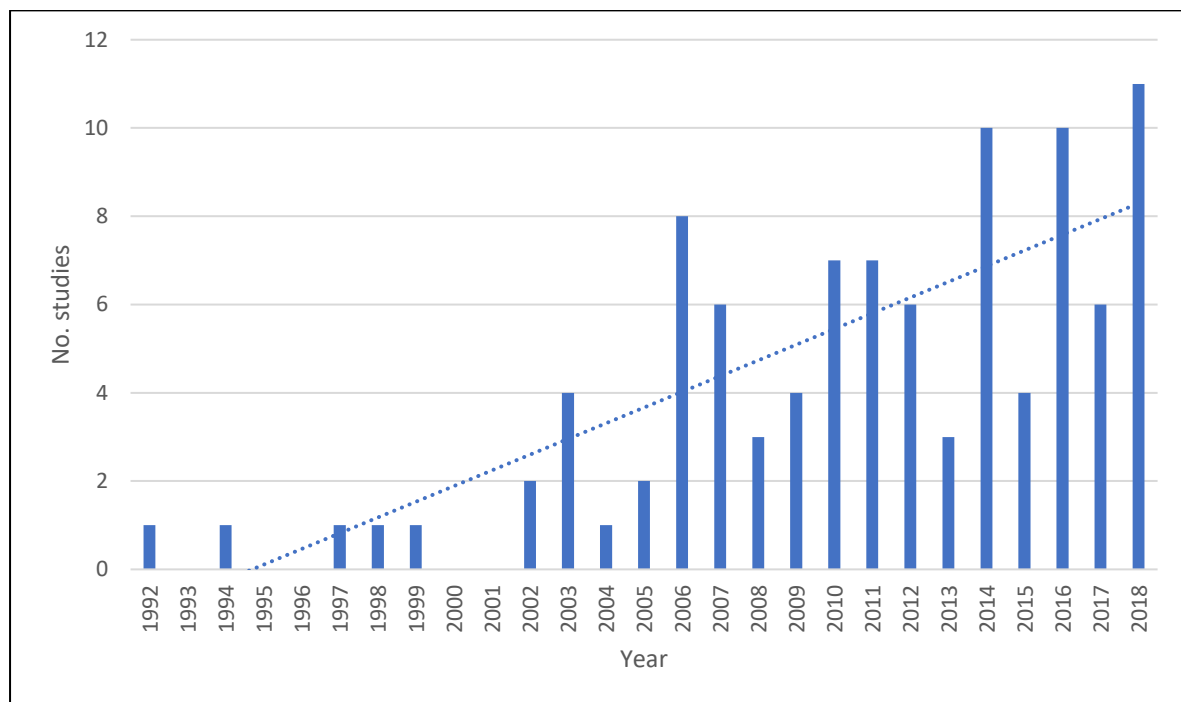

Figure 1 Years of publications

#### *Countries of origin*

Figure 2 illustrates the geographical distribution of included studies on the world map and figure 3 lists countries of origin (n=21) including the number of studies pertaining to each country. Eighty-eight studies originated in western or more developed countries of which the UK (n=26), Canada (n=15), Ireland (n=9), Sweden (n=9), and the United States (n=9) were most common.

1  
2  
3  
4  
5  
6  
7  
8  
9  
10  
11  
12  
13  
14  
15  
16  
17  
18  
19  
20  
21  
22  
23  
24  
25  
26  
27  
28  
29  
30  
31  
32  
33  
34  
35  
36  
37  
38  
39  
40  
41  
42  
43  
44  
45  
46



Figure 2 Map of geographical distribution of studies

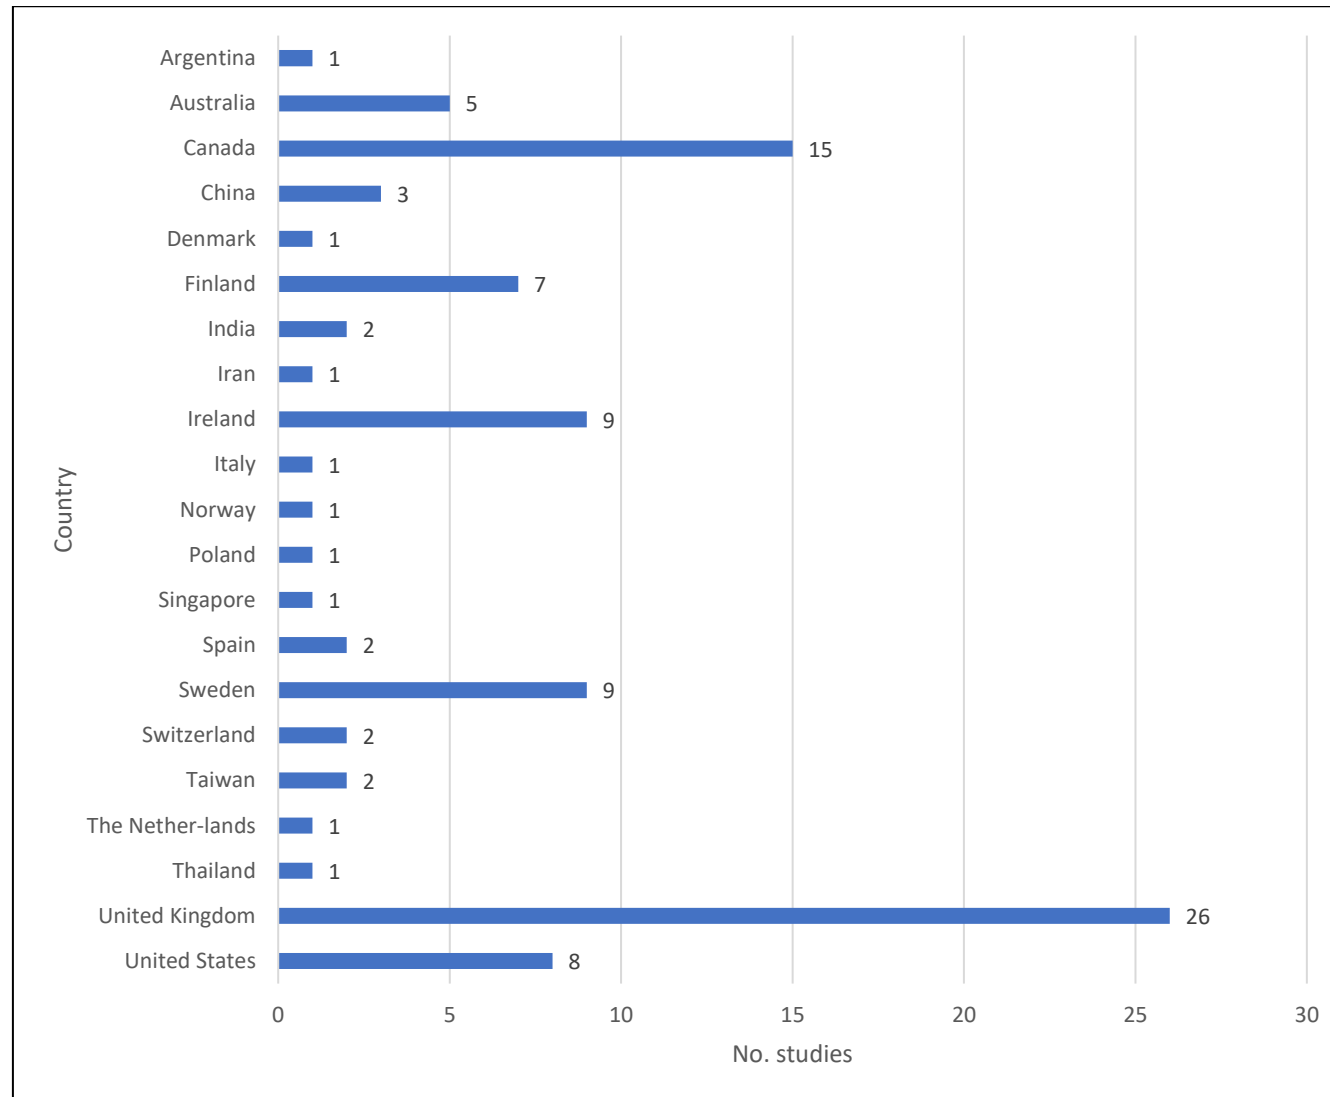

Figure 3 Number of studies per country

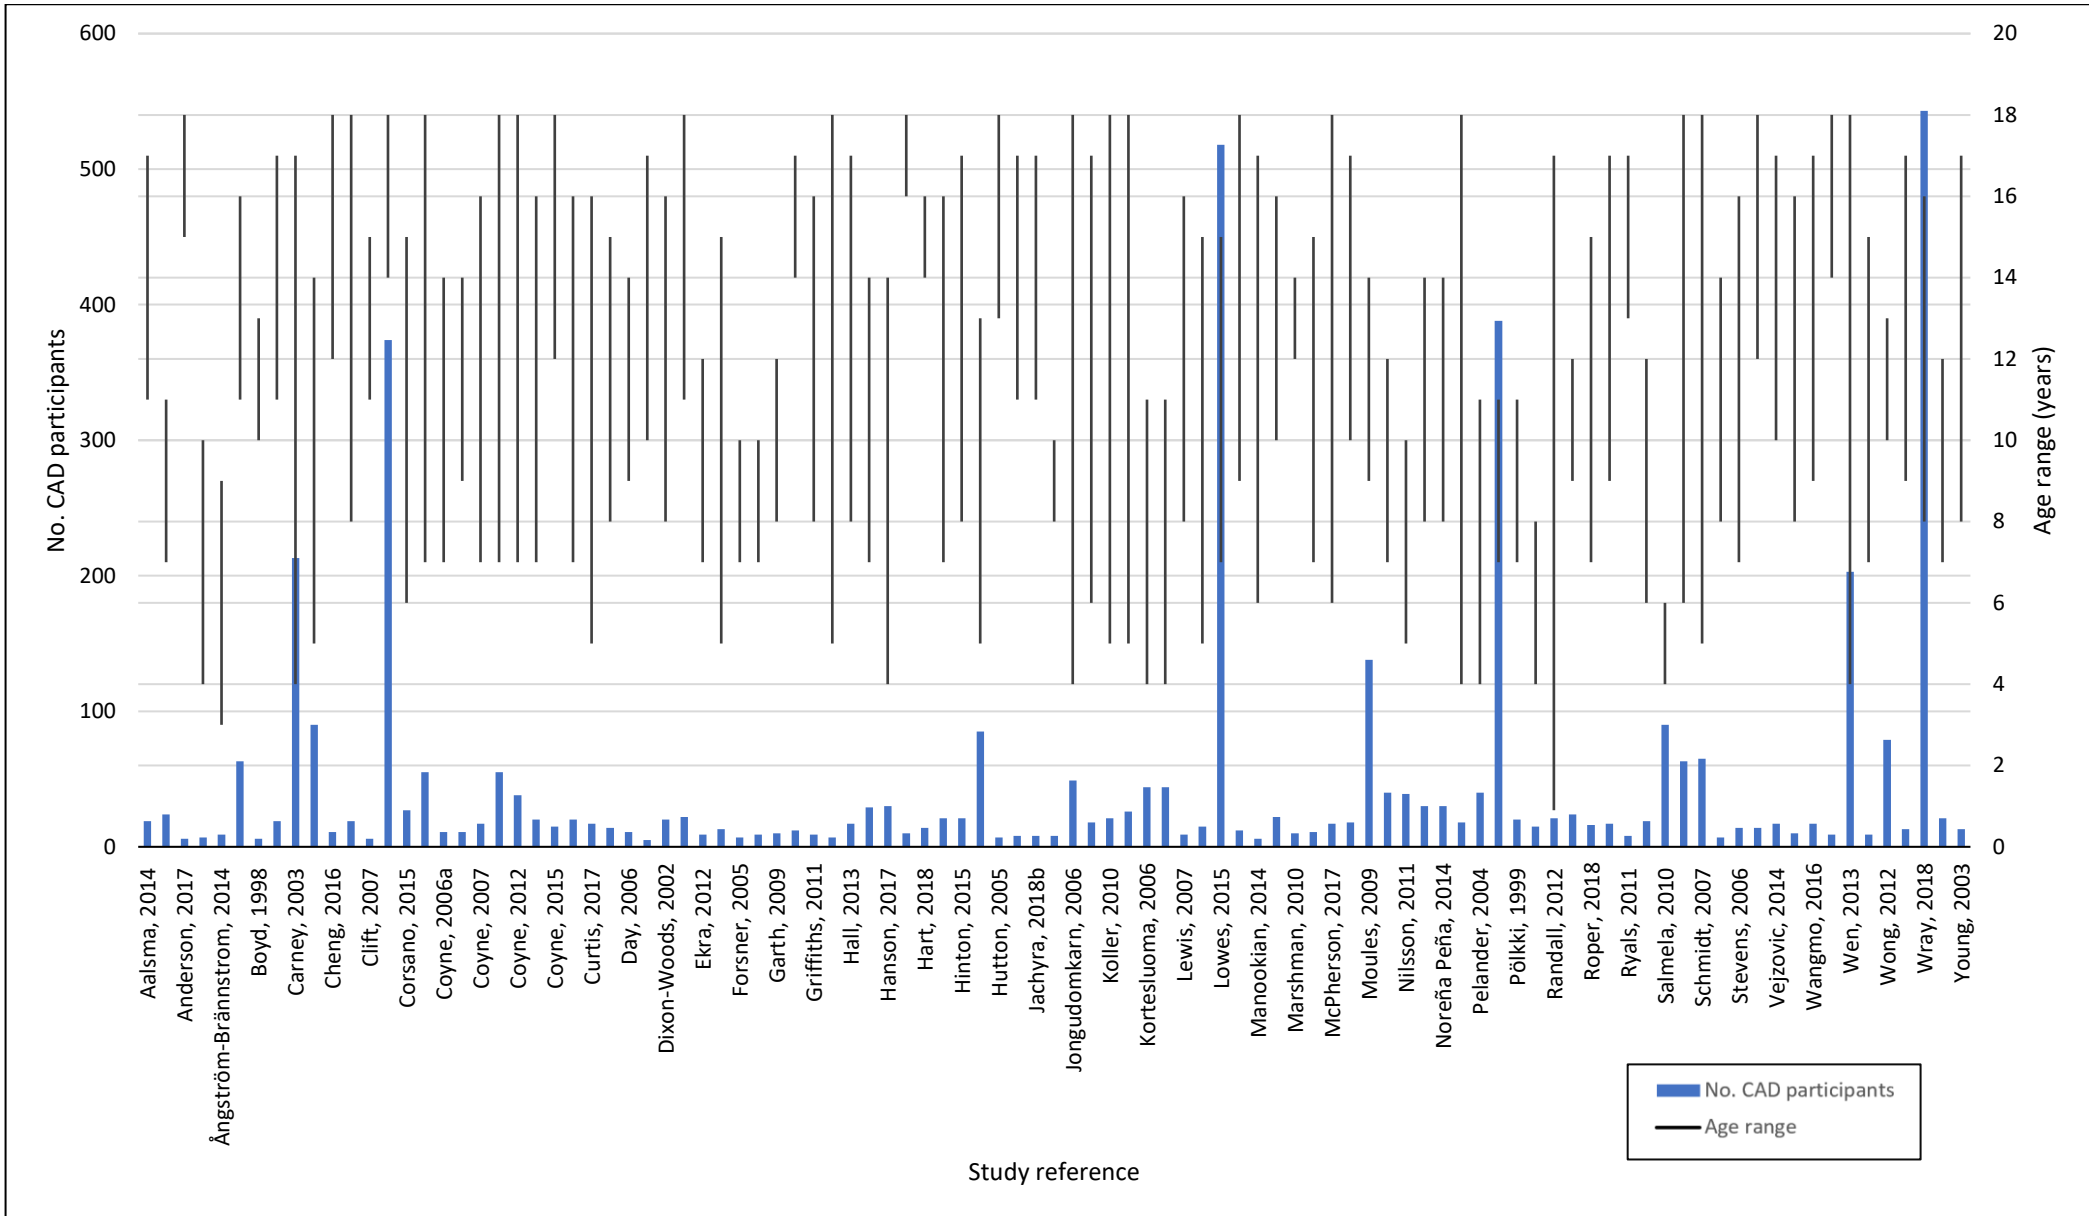

Figure 4 Number of CAD participants per study and age ranges

### *CAD participants*

The number of CAD participants per study and age ranges are illustrated in figure 4. Age ranges varied, however, most studies recruited CAD participants aged 6-17 years. Studies tended to recruit between 8 to 50 participants; seven studies recruited over 100.

### *Additional participants*

Most studies recruited CADs only (n=72). Some studies recruited other participants (n=27); who were parents, HCPs, and teachers (figure 5).

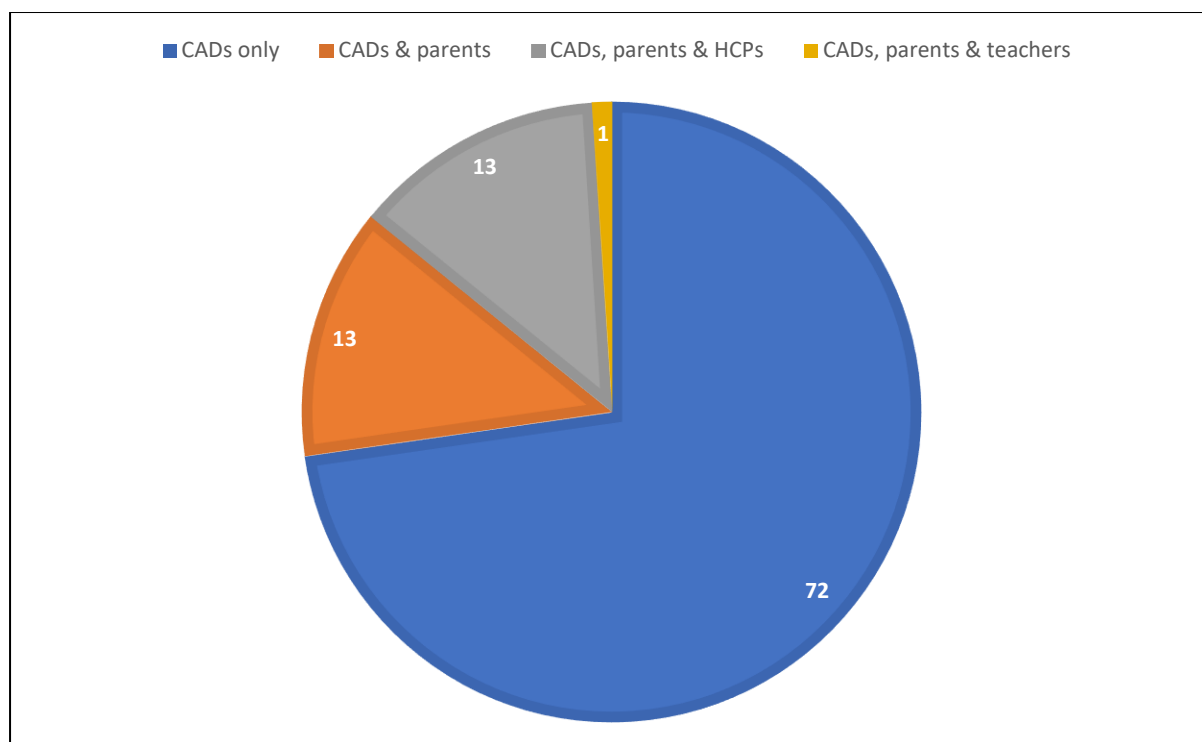

Figure 5 Study participants

### *Study methods*

Most studies used a single method; interviews were most prevalent, followed by focus groups, free-text questionnaires, and workshops (figure 6). Twenty-nine studies used 2 or 3 methods; commonly, interviews combined with observation or focus groups (figure 7).

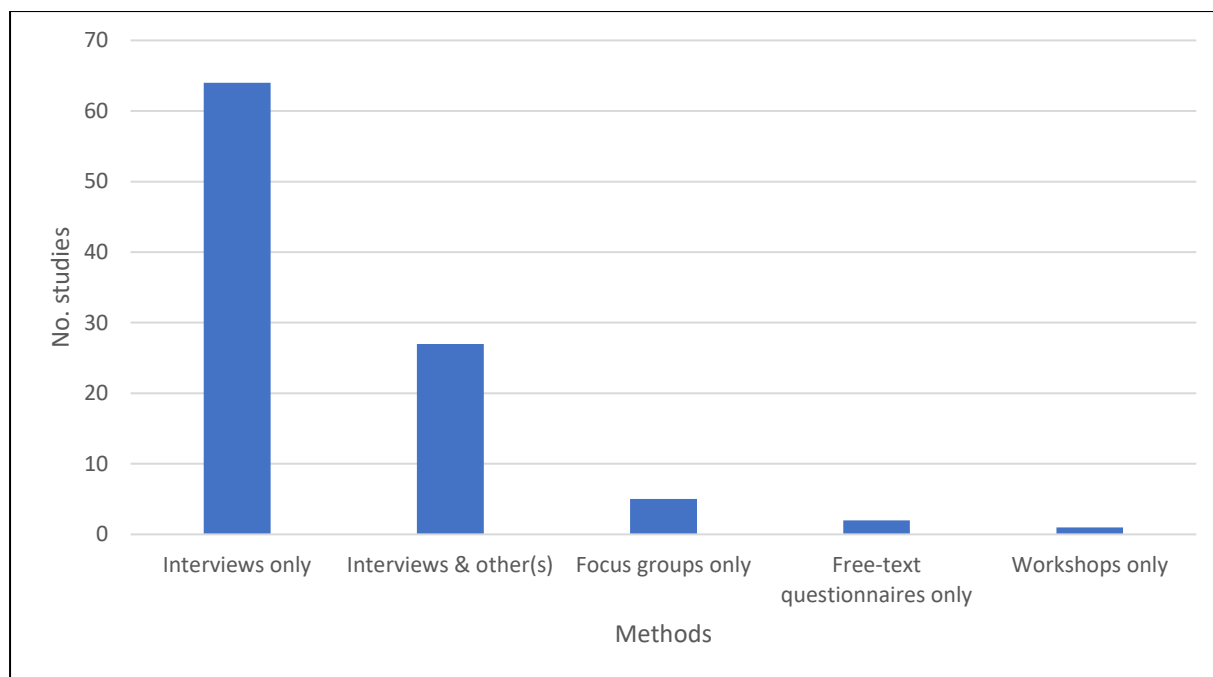

Figure 6 Methods classification

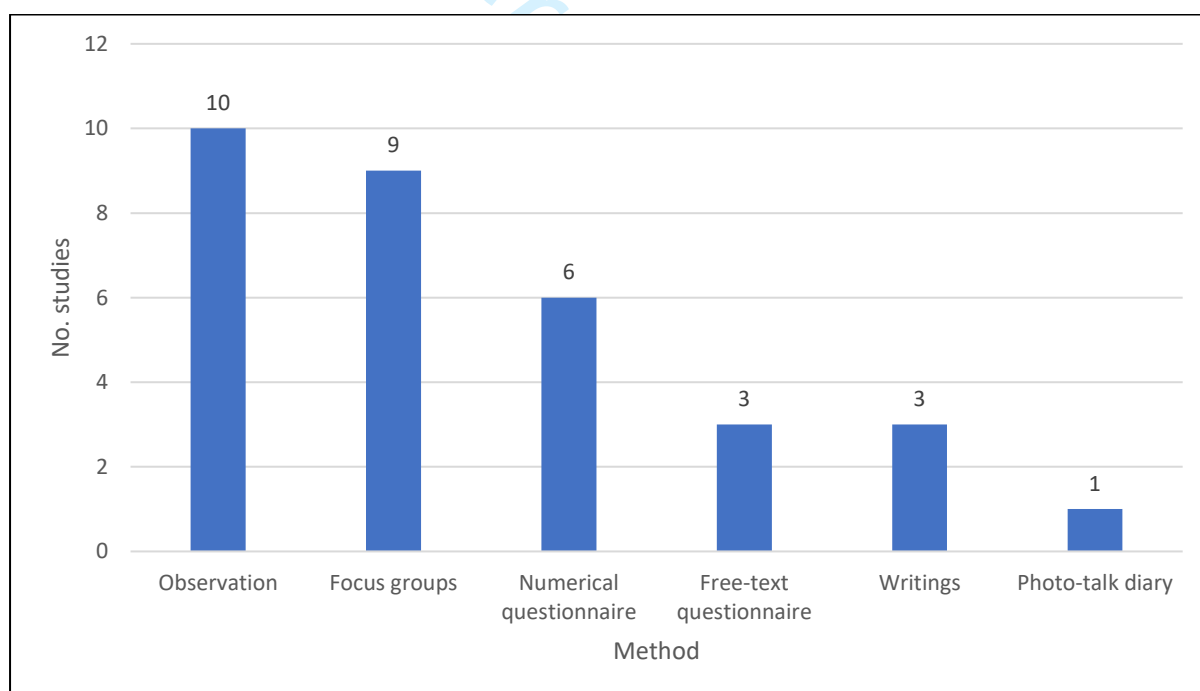

Figure 7 Methods conducted with interviews

### CADs' ages and genders from extracted quotes

Figure 1 illustrates the age distribution of quotations extracted. CADs aged 11-14 were more commonly quoted, while those aged 5-8 years were quoted less. Many quotations referenced CADs' ages (n=379, 56.7%) and genders (n=390, 58.3%); of which 52% were female.



Figure 1 CAD participant ages, from extracted quotes



Quotations presented in results section

The full quotations extracted from articles are accessible using the Dryad unique identifier

<https://doi.org/10.5061/dryad.z08kprrc2>

| Quote no. | Quote as written in results section                                                           | Quote reference (first author, year, quote no.) |
|-----------|-----------------------------------------------------------------------------------------------|-------------------------------------------------|
| 1         | 'bond'                                                                                        | Ryals, 2011(49)                                 |
| 2         | 'emotional attachment'                                                                        | Brown et al., 2014(04)                          |
| 3         | 'best friend'                                                                                 | Ryals, 2011(33)                                 |
| 4         | 'relate to'                                                                                   | Ryals, 2011(32)                                 |
| 5         | 'good care'                                                                                   | Ångström-Brännström et al., 2008(05)            |
| 6         | 'strangers'                                                                                   | Coyne et al., 2015(02)                          |
| 7         | 'As time passed, [...] we created that bond.'                                                 | Ryals, 2011(29)                                 |
| 8         | 'very smart'                                                                                  | Coyne et al., 2014(02)                          |
| 9         | 'experienced'                                                                                 | Hodgins et al., 1997(02)                        |
| 10        | '[knew] what to do'                                                                           | Day et al., 2006(04)                            |
| 11        | '[took] care'                                                                                 | Noreña Peña, 2011(21)                           |
| 12        | 'everything the best they [could]'                                                            | Boyd, 1998(03)                                  |
| 13        | 'truthful'                                                                                    | Brown et al., 2014(15)                          |
| 14        | 100% with you'                                                                                | Brown et al., 2014(15)                          |
| 15        | 'just [told] you straight up.'                                                                | Brown et al., 2014(15)                          |
| 16        | 'not tell children any lies'                                                                  | Koller et al., 2010(02)                         |
| 17        | 'nothing [was] hidden'                                                                        | Coyne et al., 2016(01)                          |
| 18        | 'really nice'                                                                                 | Clift et al., 2007(06)                          |
| 19        | 'nurturing, caring and helpful people who [were] there for you'                               | Schmidt et al., 2007(01)                        |
| 20        | 'good sense of [humour]'                                                                      | Schmidt et al., 2007(15)                        |
| 21        | 'she knew what I was talking about, she knew what I was feeling, she knew how I was feeling.' | Ryals, 2011(20)                                 |
| 22        | 'took time to get to know'                                                                    | Brown et al., 2014(06)                          |
| 23        | 'real conversations, not just [HCP]-patient discussions'                                      | Schmidt et al., 2007(31)                        |
| 24        | 'down to earth'                                                                               | Ryals, 2011(45)                                 |
| 25        | 'a lot in common'                                                                             | Ryals, 2011(22)                                 |
| 26        | 'you gotta have trust.'                                                                       | Ryals, 2011(42)                                 |
| 27        | 'satisfied'                                                                                   | Wangmo et al. 2016(05)                          |
| 28        | 'happy'                                                                                       | Corsano et al. 2015(04)                         |
| 29        | 'good memories'                                                                               | Manookian et al, 2014(03)                       |
| 30        | 'open up'                                                                                     | Ryals, 2011(42)                                 |
| 31        | 'tell anything'                                                                               | Beresford et al, 2003(06)                       |
| 32        | 'cure [the] illness'                                                                          | Han et al, 2011(01)                             |
| 33        | 'whatever happens I let them [HCPs] do what they have to do to help me get better.'           | Boyd & Hunsberger, 1998(01)                     |
| 34        | 'individually [they're] all heroes.'                                                          | Anderson et al., 2017(04)                       |
| 35        | 'Because you can save people [...] I'm going to be a children's doctor.'                      | Olausson et al., 2006(01)                       |
| 36        | 'everything [was] always clear'                                                               | Schalkers et al., 2014(04)                      |
| 37        | 'together'                                                                                    | Dell'Api et al., 2007(07)                       |
| 38        | 'seriously'                                                                                   | Clift et al., 2007(05)                          |
| 39        | 'as an equal'                                                                                 | Clift et al., 2007(05)                          |

|    |                                                                                                                                                                                                                                          |                            |
|----|------------------------------------------------------------------------------------------------------------------------------------------------------------------------------------------------------------------------------------------|----------------------------|
| 40 | 'into all the conversations'                                                                                                                                                                                                             | Coyne et al., 2011(15)     |
| 41 | 'as much as they [talked to the] parents'                                                                                                                                                                                                | Edgecombe et al., 2010(03) |
| 42 | '[breaking] the words down in an easier explanation'                                                                                                                                                                                     | Coyne et al., 2006(13)     |
| 43 | 'listening'                                                                                                                                                                                                                              | Coyne et al., 2006(03)     |
| 44 | 'I tell them I don't want this and they ... understand'                                                                                                                                                                                  | Coyne et al., 2006(03)     |
| 45 | 'me because I know my own body, my parents because they know what's best for me [...] and the paediatrician because they are qualified.'                                                                                                 | Garth et al., 2009(02)     |
| 46 | 'most important, as in the end it is about [them]'                                                                                                                                                                                       | Schalkers et al., 2014(04) |
| 47 | 'brilliant'                                                                                                                                                                                                                              | Moules, 2009(01)           |
| 48 | 'interesting and informational'                                                                                                                                                                                                          | Lowes et al., 2015(02)     |
| 49 | 'learn something new'                                                                                                                                                                                                                    | Lowes et al., 2015(03)     |
| 50 | 'comfortable and confident'                                                                                                                                                                                                              | Lowes et al., 2015(02)     |
| 51 | 'make better decisions'                                                                                                                                                                                                                  | Coyne & Kirwan, 2012(23)   |
| 52 | 'fully informed'                                                                                                                                                                                                                         | Coyne & Kirwan, 2012(23)   |
| 53 | 'I'm asking the doctor more questions myself than having my Dad do it.'                                                                                                                                                                  | Coyne et al., 2006(15)     |
| 54 | 'nasty'                                                                                                                                                                                                                                  | McPherson et al., 2018(03) |
| 55 | '[seeming] that concerned'                                                                                                                                                                                                               | Coyne, 2006b(02)           |
| 56 | 'too busy'                                                                                                                                                                                                                               | Coyne et al., 2006(28)     |
| 57 | 'big words'                                                                                                                                                                                                                              | Coyne et al., 2006(16)     |
| 58 | 'they [HCPs] might ask me "is that ok" and they ask me in such a way that I kind of feel like I don't have any other option but [to] agree with them'                                                                                    | Coyne et al., 2015(01)     |
| 59 | 'behind the curtains'                                                                                                                                                                                                                    | Coyne et al., 2011(20)     |
| 60 | 'in the middle'                                                                                                                                                                                                                          | Coyne et al., 2006(18)     |
| 61 | 'you try to say something but then your parents just say shhhh! [...] They come out and say, [...] did you understand that, you say no, they say, you should have asked them, and then you say, oh you didn't let me, they say rubbish!' | Hawthorne et al., 2011(04) |
| 62 | 'rejected'                                                                                                                                                                                                                               | Coyne et al., 2006(17)     |
| 63 | 'like a piece of machinery'                                                                                                                                                                                                              | Coyne, 2006b(04)           |
| 64 | 'hard to talk'                                                                                                                                                                                                                           | Anderson et al., 2017(01)  |
