# Supplementary material for: How do children and adolescents experience healthcare professionals? Scoping review and interpretive synthesis
Source: PubMed Central journal article supplement — BMJ Open. 2021 Jul 9;11(7):e054368. doi: 10.1136/bmjopen-2021-054368 (PMC8273482; doi:10.1136/bmjopen-2021-054368), 2021-07-09
Supplement: bmjopen-2021-054368supp002.pdf [file bmjopen-2021-054368supp002.pdf]

| MEDLINE search                                                                                                                                                                                                                                                                                 |
|------------------------------------------------------------------------------------------------------------------------------------------------------------------------------------------------------------------------------------------------------------------------------------------------|
| 1. health?care.mp.                                                                                                                                                                                                                                                                             |
| 2. Hospitals/                                                                                                                                                                                                                                                                                  |
| 3. Community Mental Health Services/ or Mental Health Services/ or Community Health Services/ or Community Health Nursing/                                                                                                                                                                     |
| 4. School Health Services/                                                                                                                                                                                                                                                                     |
| 5. 1 or 2 or 3 or 4                                                                                                                                                                                                                                                                            |
| 6. Stress, Psychological/                                                                                                                                                                                                                                                                      |
| 7. Emotions/                                                                                                                                                                                                                                                                                   |
| 8. emotion*.mp.                                                                                                                                                                                                                                                                                |
| 9. experienc*.mp.                                                                                                                                                                                                                                                                              |
| 10. 6 or 7 or 8 or 9                                                                                                                                                                                                                                                                           |
| 11. 5 and 10                                                                                                                                                                                                                                                                                   |
| 12. limit 11 to "all child (0 to 18 years)"                                                                                                                                                                                                                                                    |
| 13. ((child* or infant* or adolescen* or teen?age* or boy* or girl* or toddler*) adj5 (view* or opinion* or feeling* or emotion* or experience* or perception* or first?hand* or their* or say?in or decision* or choice* or choos* or autonomon* or interview* or art or "art* therap*")).mp. |
| 14. 12 and 13                                                                                                                                                                                                                                                                                  |
| 15. Qualitative Research/                                                                                                                                                                                                                                                                      |
| 16. 14 and 15                                                                                                                                                                                                                                                                                  |

key: mp, multi-purpose search; adj5, search within adjacent 5 words.
