# Supplementary material for: How do children and adolescents experience healthcare professionals? Scoping review and interpretive synthesis
Source: PubMed Central journal article supplement — BMJ Open. 2021 Jul 9;11(7):e054368. doi: 10.1136/bmjopen-2021-054368 (PMC8273482; doi:10.1136/bmjopen-2021-054368), 2021-07-09
Supplement: bmjopen-2021-054368supp003.pdf [file bmjopen-2021-054368supp003.pdf]

## Braun &amp; Clarke 15-point Thematic Analysis Checklist

| Process        | No. | Criteria                                                                                                                                                        | Response                                                                                                                                                                                                                                                                                                                                                           |
|----------------|-----|-----------------------------------------------------------------------------------------------------------------------------------------------------------------|--------------------------------------------------------------------------------------------------------------------------------------------------------------------------------------------------------------------------------------------------------------------------------------------------------------------------------------------------------------------|
| Transcription  | 1   | The data have been transcribed to an appropriate level of detail, and the transcripts have been checked against the tapes for 'accuracy'                        | Both focus group transcripts transcribed to an appropriate level of detail and checked against tapes.                                                                                                                                                                                                                                                              |
| Coding         | 2   | Each data item has been given equal attention in the coding process                                                                                             | We reviewed all quotations to generate coding.                                                                                                                                                                                                                                                                                                                     |
|                | 3   | Themes have not been generated from a few vivid examples (an anecdotal approach), but instead the coding process has been thorough, inclusive and comprehensive | Themes, and the findings described herein, were developed from a complete coding process of the entire dataset. The coding process was thorough, inclusive and comprehensive, as all quotations were used to generate codes, and develop themes. Each theme was developed based on numerous codes gathered across a range of articles and participants quotations. |
|                | 4   | All relevant extracts for all each theme have been collated                                                                                                     | Yes.                                                                                                                                                                                                                                                                                                                                                               |
|                | 5   | Themes have been checked against each other and back to the original data set                                                                                   | Yes.                                                                                                                                                                                                                                                                                                                                                               |
|                | 6   | Themes are internally coherent, consistent, and distinctive                                                                                                     | Yes.                                                                                                                                                                                                                                                                                                                                                               |
| Analysis       | 7   | Data have been analysed- interpreted, made sense of- rather than just paraphrased or described                                                                  | Yes, evident from the results.                                                                                                                                                                                                                                                                                                                                     |
|                | 8   | Analysis and data match each other- the extracts illustrate the analytic claims                                                                                 | The analysis and findings from it closely match the data set.                                                                                                                                                                                                                                                                                                      |
|                | 9   | Analysis tells a convincing and well-organised story about the data and topic                                                                                   | Yes.                                                                                                                                                                                                                                                                                                                                                               |
|                | 10  | A good balance between analytical narrative and illustrative extracts is provided                                                                               | Yes. Illustrative extracts have been used within the results section.                                                                                                                                                                                                                                                                                              |
| Overall        | 11  | Enough time has been allocated to complete all phases of the analysis adequately, without rushing a phase or giving it a once-over-lightly                      | Yes.                                                                                                                                                                                                                                                                                                                                                               |
| Written report | 12  | The assumptions about, and specific approach to, thematic analysis are clearly explicated                                                                       | Yes, stated in the methods section.                                                                                                                                                                                                                                                                                                                                |
|                | 13  | There is good fit between what you claim you do, and what you show you have done- i.e. described method and reported analysis are consistent                    | Yes.                                                                                                                                                                                                                                                                                                                                                               |

|  |    |                                                                                                               |      |
|--|----|---------------------------------------------------------------------------------------------------------------|------|
|  | 14 | The language and concepts used in the report are consistent with the epistemological position of the analysis | Yes. |
|  | 15 | The researcher is positioned as <i>active</i> in the research process; themes do not just 'emerge'            | Yes. |

## REFERENCE:

1. Braun V, Clarke V. Successful qualitative research: a practical guide for beginners. London: SAGE Publications Ltd; 2013.
