# Supplementary material for: How do children and adolescents experience healthcare professionals? Scoping review and interpretive synthesis
Source: PubMed Central journal article supplement — BMJ Open. 2021 Jul 9;11(7):e054368. doi: 10.1136/bmjopen-2021-054368 (PMC8273482; doi:10.1136/bmjopen-2021-054368), 2021-07-09
Supplement: bmjopen-2021-054368supp004.pdf [file bmjopen-2021-054368supp004.pdf]

### **Additional Scoping Review Results: Basic numerical analysis and figures**

This supplementary information includes additional findings and graphical illustrations from basic numerical analysis.

#### *Trend in study publications over time*

On average, four studies were published each year and the rate of publication rose progressively, increasing to 11 per year in 2018 (as shown in Figure 1).

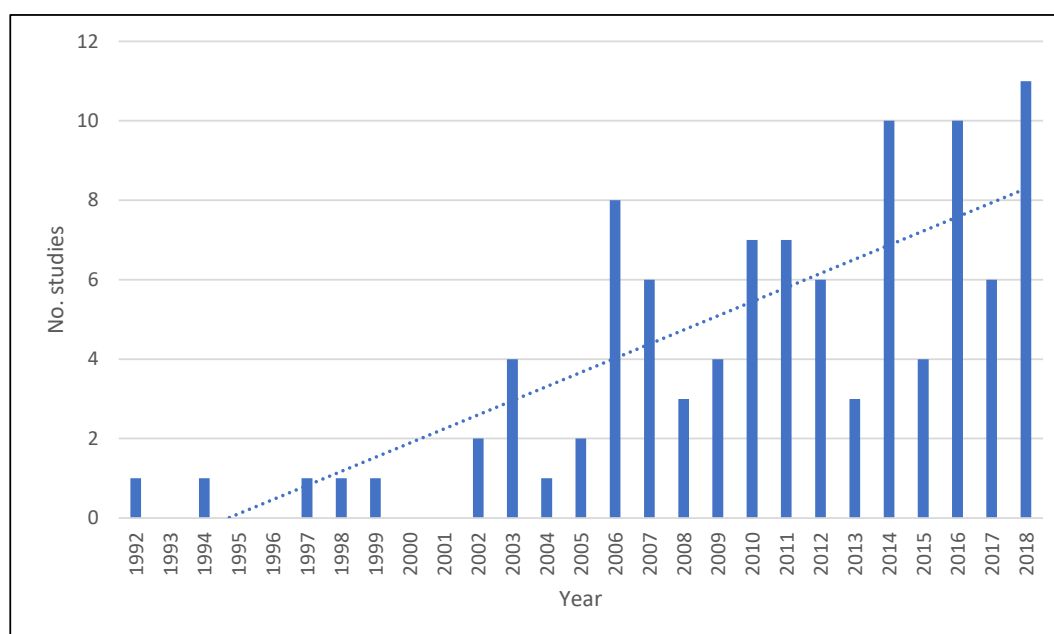

Figure 1 Years of publications

#### *Countries of origin*

Figure 2 illustrates the geographical distribution of included studies on the world map and figure 3 lists countries of origin (n=21) including the number of studies pertaining to each country. Eighty-eight studies originated in western or more developed countries of which the UK (n=26), Canada (n=15), Ireland (n=9), Sweden (n=9), and the United States (n=9) were most common.

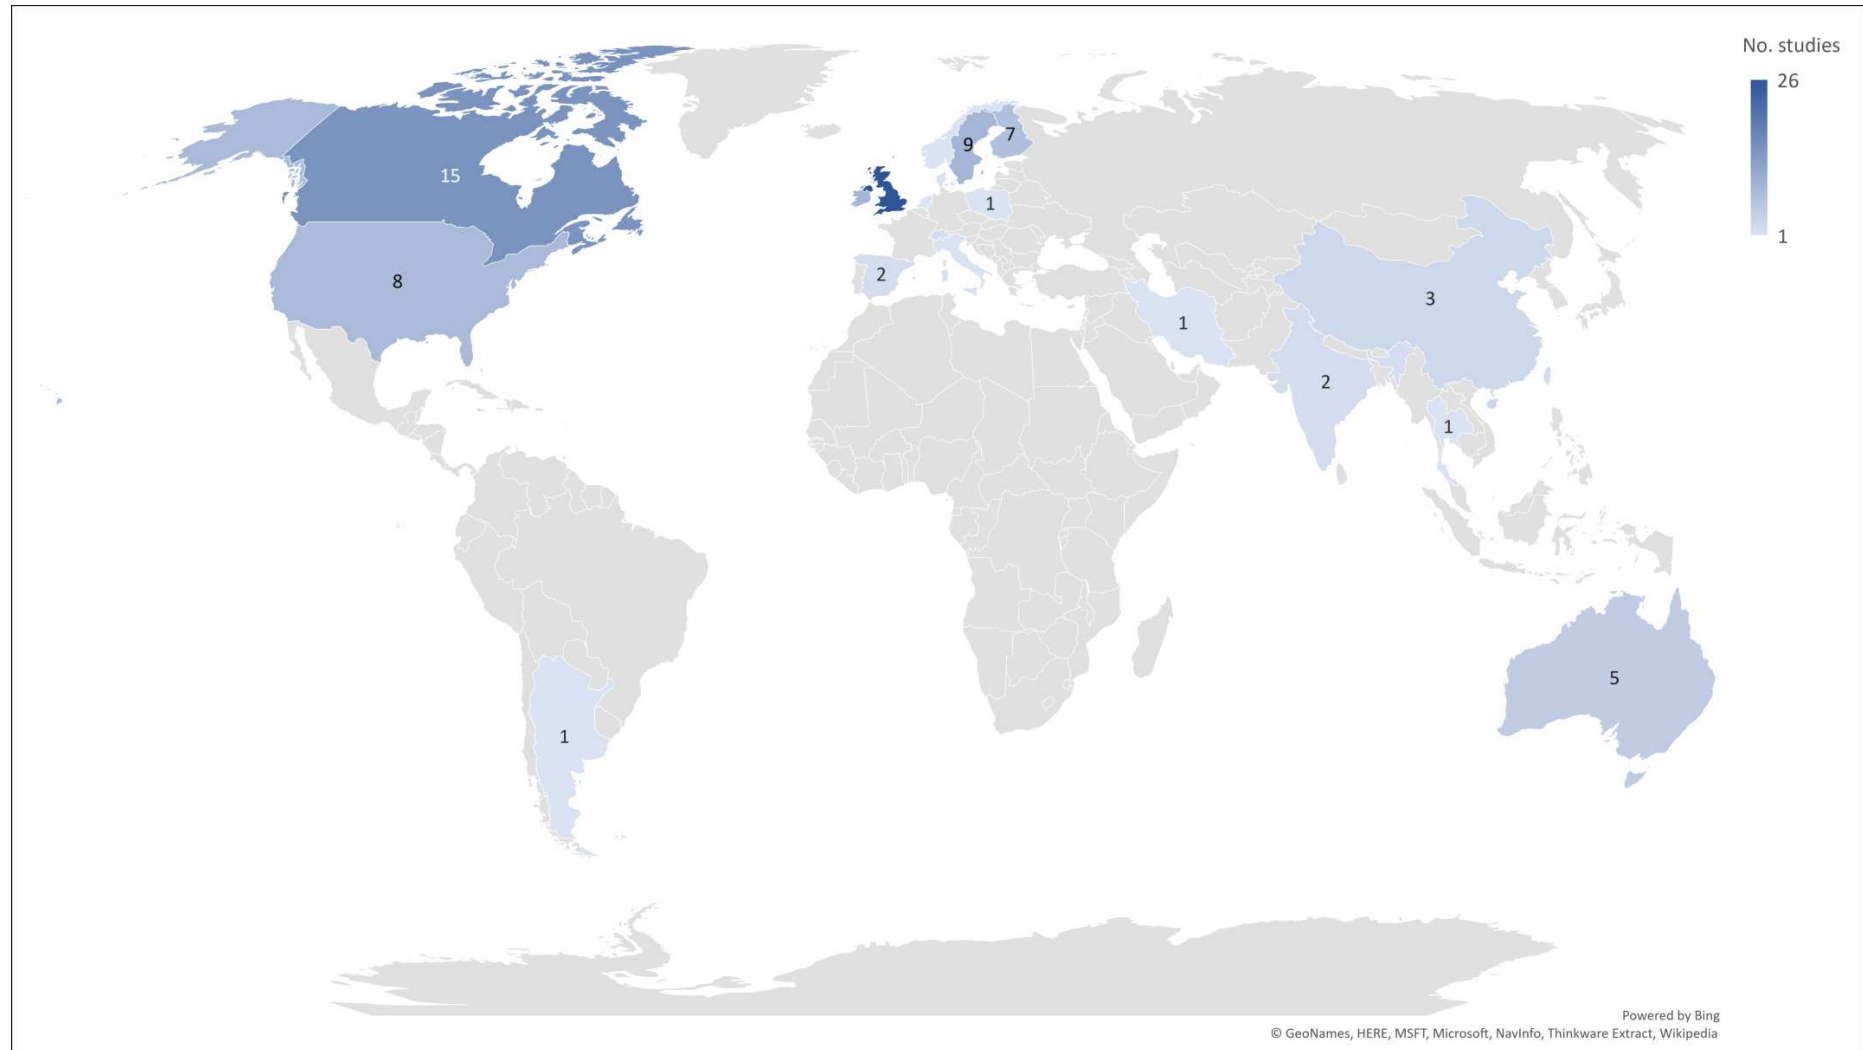

Figure 2 Map of geographical distribution of studies

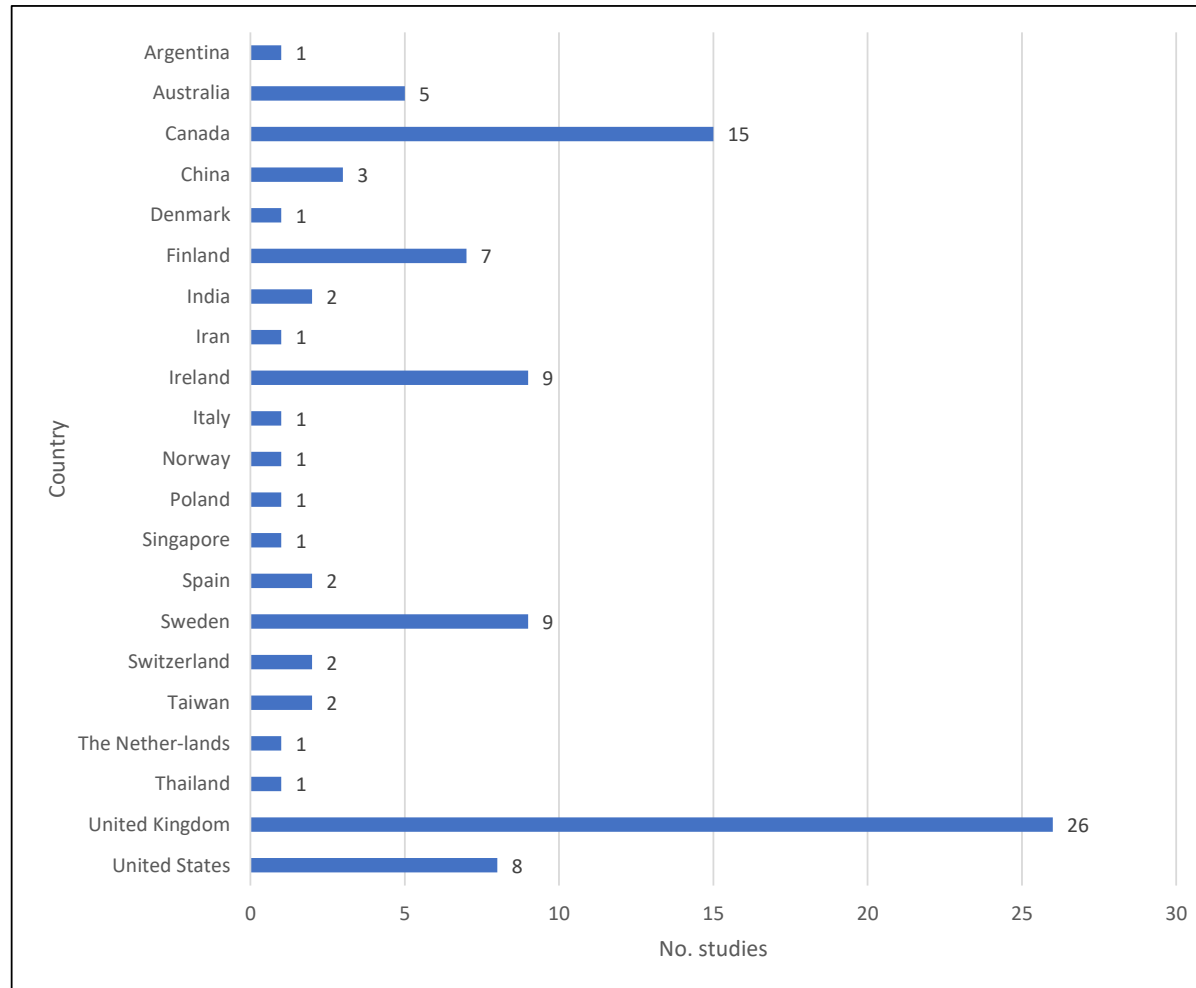

Figure 3 Number of studies per country

Figure 4 Number of CAD participants per study and age ranges

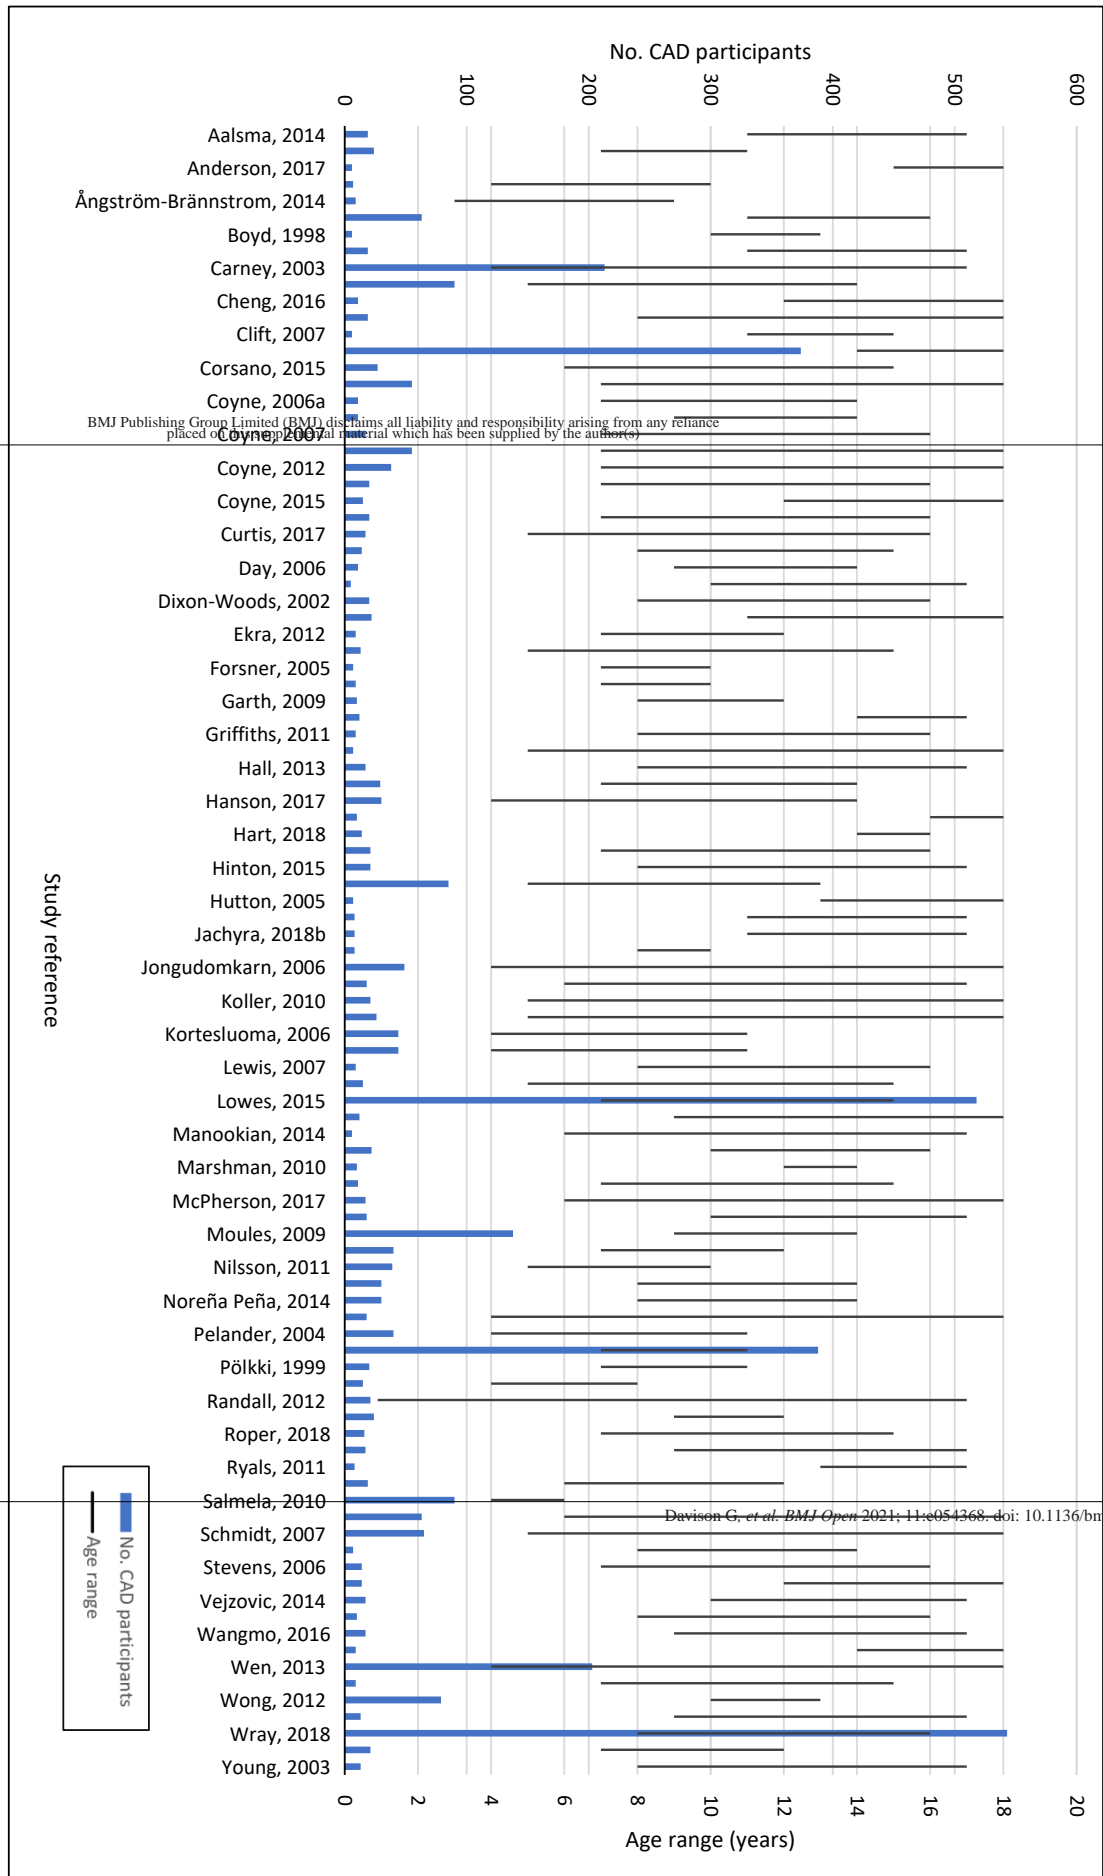

### CAD participants

The number of CAD participants per study and age ranges are illustrated in figure 4. Age ranges varied, however, most studies recruited CAD participants aged 6-17 years. Studies tended to recruit between 8 to 50 participants; seven studies recruited over 100.

### Additional participants

Most studies recruited CADs only (n=72). Some studies recruited other participants (n=27); who were parents, HCPs, and teachers (figure 5).

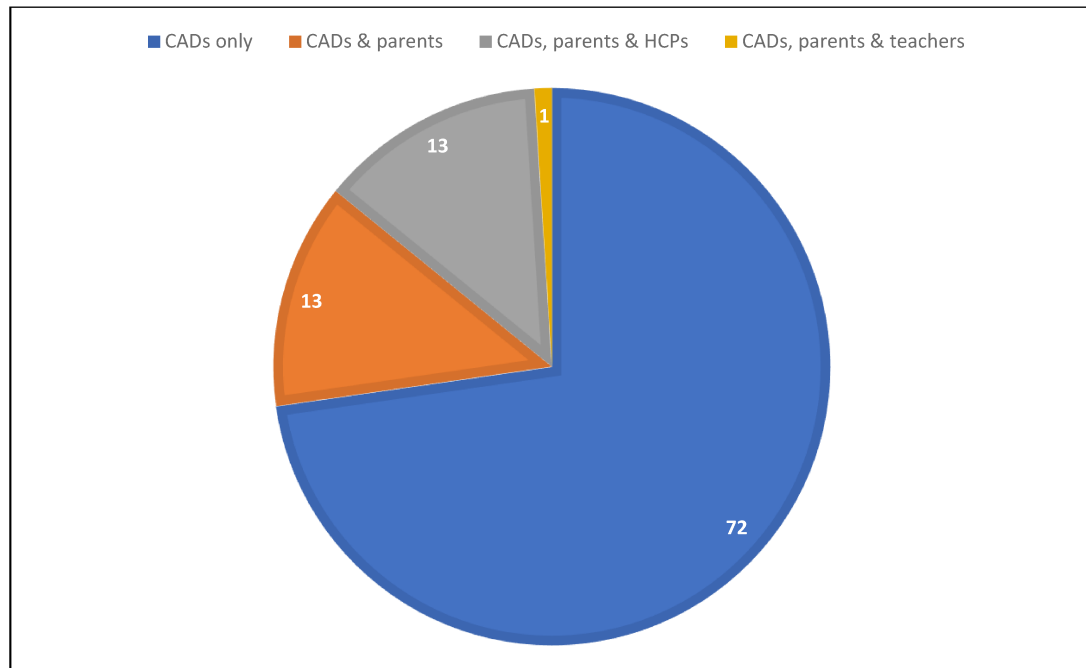

Figure 5 Study participants

### Study methods

Most studies used a single method; interviews were most prevalent, followed by focus groups, free-text questionnaires, and workshops (figure 6). Twenty-nine studies used 2 or 3 methods; commonly, interviews combined with observation or focus groups (figure 7).

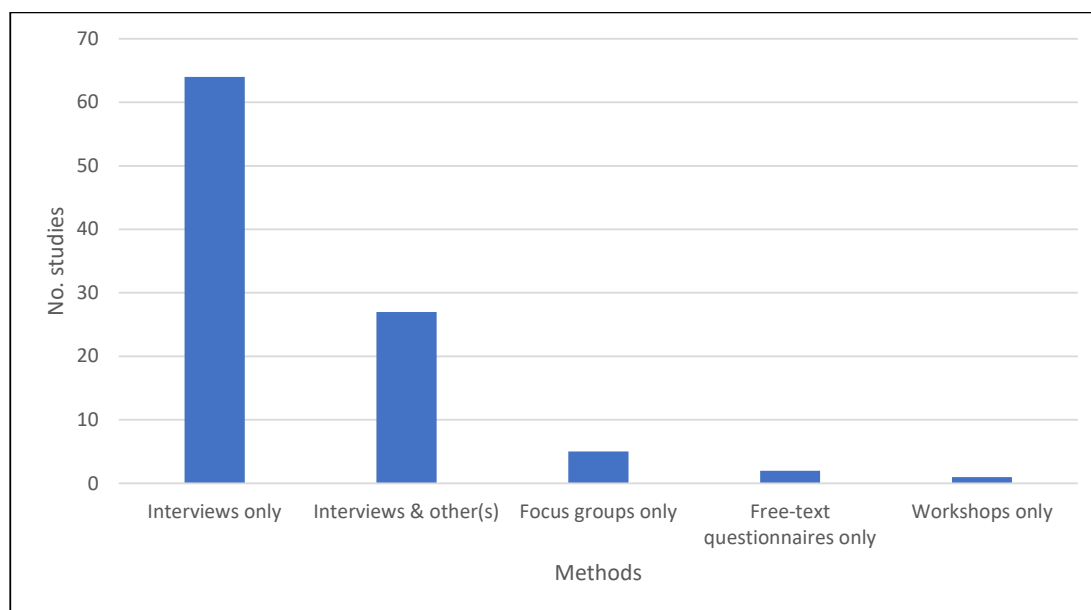

Figure 6 Methods classification

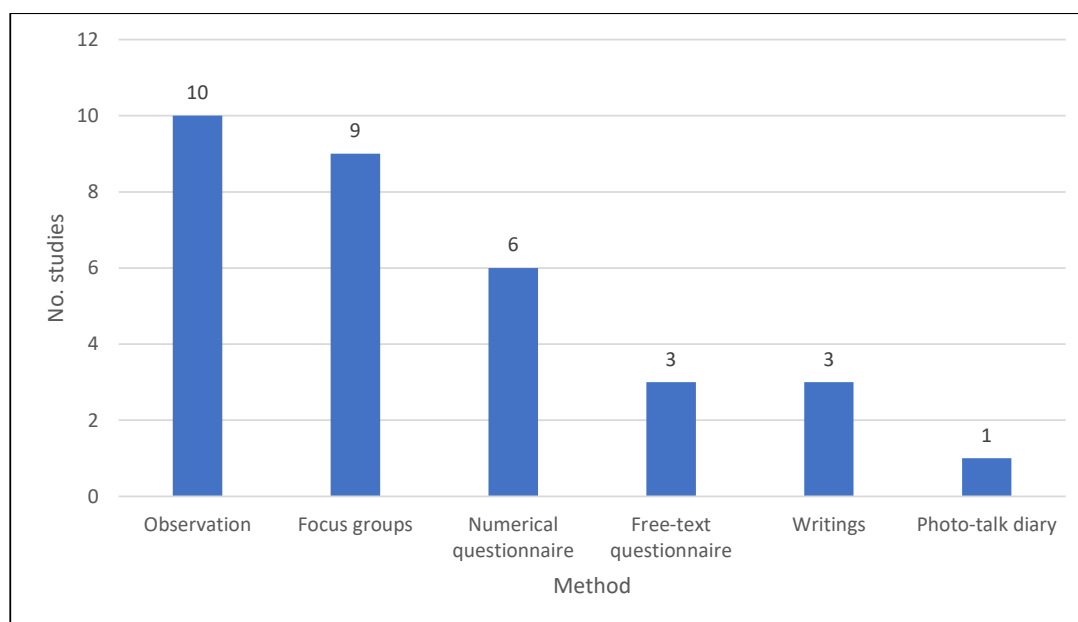

Figure 7 Methods conducted with interviews
