# Supplementary material for: How do children and adolescents experience healthcare professionals? Scoping review and interpretive synthesis
Source: PubMed Central journal article supplement — BMJ Open. 2021 Jul 9;11(7):e054368. doi: 10.1136/bmjopen-2021-054368 (PMC8273482; doi:10.1136/bmjopen-2021-054368), 2021-07-09
Supplement: bmjopen-2021-054368supp005.pdf [file bmjopen-2021-054368supp005.pdf]

CADs' ages and genders from extracted quotes

Figure 1 illustrates the age distribution of quotations extracted. CADs aged 11-14 were more commonly quoted, while those aged 5-8 years were quoted less. Many quotations referenced CADs' ages (n=379, 56.7%) and genders (n=390, 58.3%); of which 52% were female.

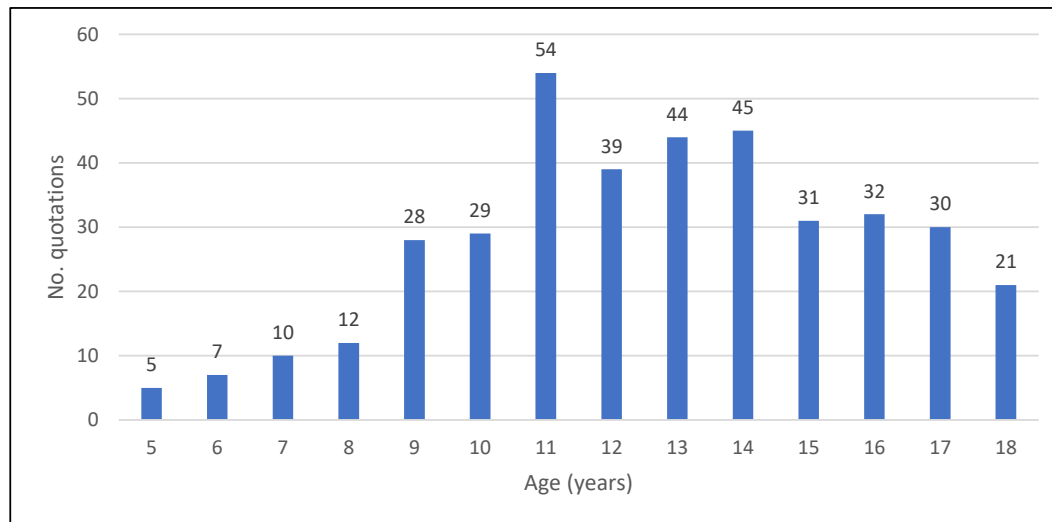

Figure 1 CAD participant ages, from extracted quotes
