# Supplementary material for: How do children and adolescents experience healthcare professionals? Scoping review and interpretive synthesis
Source: PubMed Central journal article supplement — BMJ Open. 2021 Jul 9;11(7):e054368. doi: 10.1136/bmjopen-2021-054368 (PMC8273482; doi:10.1136/bmjopen-2021-054368), 2021-07-09
Supplement: bmjopen-2021-054368supp007.pdf [file bmjopen-2021-054368supp007.pdf]

Quotations presented in results section

The full quotations extracted from articles are accessible using the Dryad unique identifier

<https://doi.org/10.5061/dryad.t76hdr817>

| Quote no. | Quote as written in results section                                                           | Quote reference (first author, year, quote no.) |
|-----------|-----------------------------------------------------------------------------------------------|-------------------------------------------------|
| 1         | 'bond'                                                                                        | Ryals, 2011(49)                                 |
| 2         | 'emotional attachment'                                                                        | Brown et al., 2014(04)                          |
| 3         | 'best friend'                                                                                 | Ryals, 2011(33)                                 |
| 4         | 'relate to'                                                                                   | Ryals, 2011(32)                                 |
| 5         | 'good care'                                                                                   | Ångström-Brännström et al., 2008(05)            |
| 6         | 'strangers'                                                                                   | Coyne et al., 2015(02)                          |
| 7         | 'As time passed, [...] we created that bond.'                                                 | Ryals, 2011(29)                                 |
| 8         | 'very smart'                                                                                  | Coyne et al., 2014(02)                          |
| 9         | 'experienced'                                                                                 | Hodgins et al., 1997(02)                        |
| 10        | '[knew] what to do'                                                                           | Day et al., 2006(04)                            |
| 11        | '[took] care'                                                                                 | Noreña Peña, 2011(21)                           |
| 12        | 'everything the best they [could]'                                                            | Boyd, 1998(03)                                  |
| 13        | 'truthful'                                                                                    | Brown et al., 2014(15)                          |
| 14        | 100% with you'                                                                                | Brown et al., 2014(15)                          |
| 15        | 'just [told] you straight up.'                                                                | Brown et al., 2014(15)                          |
| 16        | 'not tell children any lies'                                                                  | Koller et al., 2010(02)                         |
| 17        | 'nothing [was] hidden'                                                                        | Coyne et al., 2016(01)                          |
| 18        | 'really nice'                                                                                 | Clift et al., 2007(06)                          |
| 19        | 'nurturing, caring and helpful people who [were] there for you'                               | Schmidt et al., 2007(01)                        |
| 20        | 'good sense of [humour]'                                                                      | Schmidt et al., 2007(15)                        |
| 21        | 'she knew what I was talking about, she knew what I was feeling, she knew how I was feeling.' | Ryals, 2011(20)                                 |
| 22        | 'took time to get to know'                                                                    | Brown et al., 2014(06)                          |
| 23        | 'real conversations, not just [HCP]-patient discussions'                                      | Schmidt et al., 2007(31)                        |
| 24        | 'down to earth'                                                                               | Ryals, 2011(45)                                 |
| 25        | 'a lot in common'                                                                             | Ryals, 2011(22)                                 |
| 26        | 'you gotta have trust.'                                                                       | Ryals, 2011(42)                                 |
| 27        | 'satisfied'                                                                                   | Wangmo et al. 2016(05)                          |
| 28        | 'happy'                                                                                       | Corsano et al. 2015(04)                         |
| 29        | 'good memories'                                                                               | Manookian et al, 2014(03)                       |
| 30        | 'open up'                                                                                     | Ryals, 2011(42)                                 |
| 31        | 'tell anything'                                                                               | Beresford et al, 2003(06)                       |
| 32        | 'cure [the] illness'                                                                          | Han et al, 2011(01)                             |
| 33        | 'whatever happens I let them [HCPs] do what they have to do to help me get better.'           | Boyd & Hunsberger, 1998(01)                     |
| 34        | 'individually [they're] all heroes.'                                                          | Anderson et al., 2017(04)                       |
| 35        | 'Because you can save people [...] I'm going to be a children's doctor.'                      | Olausson et al., 2006(01)                       |
| 36        | 'everything [was] always clear'                                                               | Schalkers et al., 2014(04)                      |
| 37        | 'together'                                                                                    | Dell'Api et al., 2007(07)                       |
| 38        | 'seriously'                                                                                   | Clift et al., 2007(05)                          |
| 39        | 'as an equal'                                                                                 | Clift et al., 2007(05)                          |

|    |                                                                                                                                                                                                                                           |                            |
|----|-------------------------------------------------------------------------------------------------------------------------------------------------------------------------------------------------------------------------------------------|----------------------------|
| 40 | 'into all the conversations'                                                                                                                                                                                                              | Coyne et al., 2011(15)     |
| 41 | 'as much as they [talked to the] parents'                                                                                                                                                                                                 | Edgecombe et al., 2010(03) |
| 42 | '[breaking] the words down in an easier explanation'                                                                                                                                                                                      | Coyne et al., 2006(13)     |
| 43 | 'listening'                                                                                                                                                                                                                               | Coyne et al., 2006(03)     |
| 44 | 'I tell them I don't want this and they ... understand'                                                                                                                                                                                   | Coyne et al., 2006(03)     |
| 45 | 'me because I know my own body, my parents because they know what's best for me [...] and the paediatrician because they are qualified.'                                                                                                  | Garth et al., 2009(02)     |
| 46 | 'most important, as in the end it is about [them]'                                                                                                                                                                                        | Schalkers et al., 2014(04) |
| 47 | 'brilliant'                                                                                                                                                                                                                               | Moules, 2009(01)           |
| 48 | 'interesting and informational'                                                                                                                                                                                                           | Lowes et al., 2015(02)     |
| 49 | 'learn something new'                                                                                                                                                                                                                     | Lowes et al., 2015(03)     |
| 50 | 'comfortable and confident'                                                                                                                                                                                                               | Lowes et al., 2015(02)     |
| 51 | 'make better decisions'                                                                                                                                                                                                                   | Coyne & Kirwan, 2012(23)   |
| 52 | 'fully informed'                                                                                                                                                                                                                          | Coyne & Kirwan, 2012(23)   |
| 53 | 'I'm asking the doctor more questions myself than having my Dad do it.'                                                                                                                                                                   | Coyne et al., 2006(15)     |
| 54 | 'nasty'                                                                                                                                                                                                                                   | McPherson et al., 2018(03) |
| 55 | '[seeming] that concerned'                                                                                                                                                                                                                | Coyne, 2006b(02)           |
| 56 | 'too busy'                                                                                                                                                                                                                                | Coyne et al., 2006(28)     |
| 57 | 'big words'                                                                                                                                                                                                                               | Coyne et al., 2006(16)     |
| 58 | 'they [HCPs] might ask me "is that ok" and they ask me in such a way that I kind of feel like I don't have any other option but [to] agree with them'                                                                                     | Coyne et al., 2015(01)     |
| 59 | 'behind the curtains'                                                                                                                                                                                                                     | Coyne et al., 2011(20)     |
| 60 | 'in the middle'                                                                                                                                                                                                                           | Coyne et al., 2006(18)     |
| 61 | 'you try to say something but then your parents just say shhhhh! [...] They come out and say, [...] did you understand that, you say no, they say, you should have asked them, and then you say, oh you didn't let me, they say rubbish!' | Hawthorne et al., 2011(04) |
| 62 | 'rejected'                                                                                                                                                                                                                                | Coyne et al., 2006(17)     |
| 63 | 'like a piece of machinery'                                                                                                                                                                                                               | Coyne, 2006b(04)           |
| 64 | 'hard to talk'                                                                                                                                                                                                                            | Anderson et al., 2017(01)  |
